# Supplementary material for: Epilepsy-Related Voltage-Gated Sodium Channelopathies: A Review
Source: PubMed Central journal article supplement (PMC7461817; doi:10.3389/fphar.2020.01276), 2020-08-18
Supplement: DataSheet_1.pdf [file DataSheet_1.pdf]

## *Supplementary Material*

**Table S1. Complete epilepsy-related mutations identified in NaV1.1 table**

| <b>Variant</b>      | <b>Location</b> | <b>Mutation</b>      | <b>Disease</b> | <b>Alteration in biophysical properties and/or Clinical report</b> | <b>Reference</b>                       |
|---------------------|-----------------|----------------------|----------------|--------------------------------------------------------------------|----------------------------------------|
| M1                  | N-terminal      | Start codon mutation | SME            | NR                                                                 | (Depienne et al., 2008)                |
| M1T                 | N-terminal      | Start codon mutation | DS             | NR                                                                 | (Zuberi et al., 2011)                  |
| Q3X (De novo)       | N-terminal      | Nonsense             | DS             | First seizures<br>Generalized tonic clonic seizures                | (Claes et al., 2003; Lim et al., 2011) |
| L6P (Paternal)      | N-termial       | Nonsense             | GEFS+          | NR                                                                 | (Cetica et al., 2017)                  |
| P8fsX12 (De novo)   | N-terminal      | FrameShift           | DS             | NR                                                                 | (Wang et al., 2012)                    |
| P11Tfs*18           | N-terminal      | FrameShift           | GEFS+          | NR                                                                 | (Cetica et al., 2017)                  |
| P11QfsX80 (De novo) | N-terminal      | FrameShift           | EE             | NR                                                                 | (Wei et al., 2018)                     |

## Supplementary Material

|                        |            |                      |           |    |                                                                          |
|------------------------|------------|----------------------|-----------|----|--------------------------------------------------------------------------|
| P11LfsX81              | N-terminal | FrameShift           | DS        | NR | (Ishii et al., 2017)                                                     |
| P14SfsX78<br>(De novo) | N-terminal | FrameShift           | DS        | NR | (Harkin et al., 2007)                                                    |
| P17del                 | N-terminal | In-Frame<br>deletion | DS        | NR | (Zuberi et al., 2011)                                                    |
| T18del                 | N-terminal | In-Frame<br>deletion | DS        | NR | (Djémié et al., 2016)                                                    |
| A19X                   | N-terminal | Nonsense             | SME       | NR | (Lee et al., 2014)                                                       |
| E20X (De<br>novo)      | N-terminal | Nonsense             | SME<br>DS | NR | (Ceulemans et al., 2004;<br>Depienne et al., 2008; Wang et<br>al., 2012) |
| A24GfsX4               | N-terminal | FrameShift           | DS        | NR | (Zuberi et al., 2011)                                                    |
| A24T                   | N-terminal | Missense             | SME       | NR | (Xu et al., 2014)                                                        |
| E26X                   | N-terminal | Nonsense             | DS        | NR | (Zuberi et al., 2011)                                                    |

|                              |                |            |                             |                                                                                                       |                                                  |
|------------------------------|----------------|------------|-----------------------------|-------------------------------------------------------------------------------------------------------|--------------------------------------------------|
| A27T<br>(Paternal)           | N-terminal     | Missense   | GEFS+<br>SMEB               | Diffuse spikes,<br>prevailing in posterior<br>regions (EEG)                                           | (Nicita et al., 2010)                            |
| R28C<br>(Paternal)           | N-terminal     | Missense   | GEFS+                       | NR                                                                                                    | (Lossin, 2009; Lal et al.,<br>2016);             |
| E32X                         | N-terminal     | Nonsense   | EP                          | NR                                                                                                    | (Lindy et al., 2018)                             |
| L33A                         | N-terminal     | Missense   | GEFS+                       | NR                                                                                                    | (Cetica et al., 2017)                            |
| L38fsX54<br>(De novo)        | N-terminal     | FrameShift | SME<br>DS                   | NR                                                                                                    | (Wallace et al., 2003;<br>Depienne et al., 2008) |
| L41X                         | N-terminal     | Nonsense   | SME                         | NR                                                                                                    | (Xu et al., 2014)                                |
| D43<br>MetfsX47              | N-terminal     | FrameShift | SME<br>DS                   | Acute encephalopathy<br>resulting in severe<br>neurologic sequelae<br>Generalized slow waves<br>(EEG) | (Takayanagi et al., 2010;<br>Wang et al., 2012)  |
| D43MetfsX<br>49 (De<br>novo) | N-terminal     | FrameShift | DS                          | NR                                                                                                    | (Depienne et al., 2008)                          |
| D45N<br>(Paternal)           | N<br>-terminal | Missense   | Epilepsy-<br>Aphasia<br>FS+ | NR                                                                                                    | (Zuberi et al., 2011; Carvill et<br>al., 2013)   |

## Supplementary Material

|                 |            |            |                      |                                                                                                                       |                          |
|-----------------|------------|------------|----------------------|-----------------------------------------------------------------------------------------------------------------------|--------------------------|
| D45E            | N-terminal | Missense   | DS                   | Multifocal discharges (EEG)<br>Hippocampal atrophy (MRI)                                                              | (Zhou et al., 2018)      |
| N47MfsX45       | N-terminal | FrameShift | Epilepsy             | NR                                                                                                                    | (Stosser et al., 2018)   |
| N47LfsX45       | N-terminal | FrameShift | Epilepsy             | NR                                                                                                                    | (Lindy et al., 2018)     |
| G58X (De novo)  | N-terminal | Nonsense   | DS<br>Focal Epilepsy | Moderate mental retardation<br>Autistic characteristics<br>Hyperactivity<br>Periventricular nodular heterotopia (MRI) | (Barba et al., 2014)     |
| G58R            | N-terminal | Missense   | FS+                  | Febrile and afebrile GTC<br>Large amplitude and diffuse (EEG)                                                         | (Mina et al., 2015)      |
| G58V            | N-terminal | Missense   | DS                   | NR                                                                                                                    | (Depienne et al., 2008)  |
| L61F            | N-terminal | Missense   | DS                   | NR                                                                                                                    | (Depienne et al., 2008)  |
| L61P (Paternal) | N-terminal | Missense   | DS                   | Febrile seizures                                                                                                      | (Halvorsen et al., 2016) |

|                    |            |            |      |                                                                                                        |                       |
|--------------------|------------|------------|------|--------------------------------------------------------------------------------------------------------|-----------------------|
| P62fsX30           | N-terminal | FrameShift | SME  | NR                                                                                                     | (Xu et al., 2014)     |
| F63L(Paternal)     | N-terminal | Missense   | DS   | Severe developmental delay<br><br>Spike and Waves in right fronto-temporal region with spreading (EEG) | (Nicita et al., 2010) |
| Y65X (De novo)     | N-terminal | Nonsense   | DS   | Generalized tonic-clonic seizures                                                                      | (Zucca et al., 2008)  |
| I68T (Maternal)    | N-terminal | Missense   | SMEB | NR                                                                                                     | (Zuberi et al., 2011) |
| Ser74Pro (De novo) | N-terminal | Missense   | FS+  | NR                                                                                                     | (Marini et al., 2007) |
| E75D (De novo)     | N-terminal | Missense   | DS   | Slow-spike-wave complexes (EEG)                                                                        | (Arafat et al., 2017) |
| P76T (De novo)     | N-terminal | Missense   | DS   | NR                                                                                                     | (Ishii et al., 2017)  |
| L77P (De novo)     | N-terminal | Missense   | DS   | NR                                                                                                     | (Kothur et al., 2018) |
| E78X               | N-terminal | Nonsense   | DS   | NR                                                                                                     | (Surovy et al., 2016) |

|                      |            |                   |          |                                                                                   |                                              |
|----------------------|------------|-------------------|----------|-----------------------------------------------------------------------------------|----------------------------------------------|
| E78GfsX7             | N-terminal | FrameShift        | Epilepsy | NR                                                                                | (Lindy et al., 2018)                         |
| E78D (De novo)       | N-terminal | Missense          | DS       | NR                                                                                | (Nabbout et al., 2003)                       |
| D79N(De novo)        | N-terminal | Missense          | DS       | NR                                                                                | (Depienne et al., 2008; Zuberi et al., 2011) |
| D79H (De novo)       | N-terminal | Missense          | SMEB     | NR                                                                                | (Harkin et al., 2007; Depienne et al., 2008) |
| L80_D81del (De novo) | N-terminal | In-frame deletion | DS       | Pharmacoresistant                                                                 | (Usluer et al., 2016)                        |
| D81N (De novo)       | N-terminal | Missense          | DS       | Severe Motor and mental delay<br>Severe Autistic<br>Multi-focal spike-waves (EEG) | (Usluer et al., 2016)                        |
| D81E (De novo)       | N-terminal | Missense          | Epilepsy | NR                                                                                | (Lindy et al., 2018)                         |
| Y83X (De novo)       | N-terminal | Nonsense          | SMEB     | NR                                                                                | (Zuberi et al., 2011)                        |
| Y84fsX4              | N-terminal | FrameShift        | DS       | NR                                                                                | (Ishii et al., 2017)                         |

|                    |            |            |      |                                                               |                                                                               |
|--------------------|------------|------------|------|---------------------------------------------------------------|-------------------------------------------------------------------------------|
| Y84C (De novo)     | N-terminal | Missense   | DS   | NR                                                            | (Harkin et al., 2007; Wang et al., 2012)                                      |
| N86SfsX7           | N-terminal | FrameShift | DS   | NR                                                            | (Ishii et al., 2017)                                                          |
| F90S(Paternal)     | N-terminal | Missense   | DS   | Multifocal spikes, frontal-dominant spike-waves complex (EEG) | (Sun et al., 2008a; Wang et al., 2012; Xu et al., 2014; Butler et al., 2017b) |
| I91T (De novo)     | N-terminal | Missense   | DS   | Frontal-dominant spike-waves complex (EEG)                    | (Sun et al., 2008a; Xu et al., 2014)                                          |
| I91SfsX4           | N-terminal | FrameShift | SMEB | NR                                                            | (Depienne et al., 2008; Villeneuve et al., 2014)                              |
| I91fs              | N-terminal | FrameShift | SME  | NR                                                            | (Lee et al., 2014)                                                            |
| L93EfsX2 (De novo) | N-terminal | FrameShift | DS   | NR                                                            | (Riva et al., 2009)                                                           |
| L93S               | N-terminal | Missense   | SME  | NR                                                            | (Lee et al., 2014)                                                            |
| L93X               | N-terminal | Nonsense   | DS   | NR                                                            | (Cetica et al., 2017)                                                         |
| N94L (De novo)     | N-terminal | Missense   | DS   | NR                                                            | (Ishii et al., 2017)                                                          |

Supplementary Material

|                           |            |            |                              |                                                           |                                                                                                                                                                                                                  |
|---------------------------|------------|------------|------------------------------|-----------------------------------------------------------|------------------------------------------------------------------------------------------------------------------------------------------------------------------------------------------------------------------|
| G96EfsX24<br>(De novo)    | N-terminal | FrameShift | NR                           | Genetic generalized epilepsy with intellectual disability | (Fry et al., 2016)                                                                                                                                                                                               |
| L97fsx14                  | N-terminal | FrameShift | SME                          | NR                                                        | (Xu et al., 2014)                                                                                                                                                                                                |
| A98P (De novo)            | N-terminal | Missense   | DS                           | NR                                                        | (Zuberi et al., 2011)                                                                                                                                                                                            |
| A98PfsX14                 | N-terminal | FrameShift | Epilepsy                     | NR                                                        | (Lindy et al., 2018)                                                                                                                                                                                             |
| R101W (De novo; Paternal) | N-terminal | Missense   | DS<br>SMEB                   | NR                                                        | (Harkin et al., 2007; Depienne et al., 2008; Sun et al., 2010; Wang et al., 2012; Fry et al., 2016; Kothur et al., 2018)                                                                                         |
| R101Q(De novo; Maternal)  | N-terminal | Missense   | DS<br>SMEB<br>GEFS+<br>PEFS+ | Psychomotor retardation                                   | (Fukuma et al., 2004; Harkin et al., 2007; Marini et al., 2007; Depienne et al., 2008; Sun et al., 2010; Zuberi et al., 2011; Wang et al., 2012; Tonekaboni et al., 2013; Lee et al., 2014; Djémié et al., 2016) |
| S103G (Paternal)          | N-terminal | Missense   | SME<br>DS                    | Severe mental decline<br>Rare-spike wave complex (EEG)    | (Fujiwara, 2003; Ebrahimi et al., 2010; Tonekaboni et al., 2013)                                                                                                                                                 |
| S103I                     | N-terminal | Missense   | DS                           | NR                                                        | (Xu et al., 2015)                                                                                                                                                                                                |



|                  |            |          |                |                                                                                          |                                           |
|------------------|------------|----------|----------------|------------------------------------------------------------------------------------------|-------------------------------------------|
| A104V (De novo)  | N-terminal | Missense | DS             | Epileptic discharges, slow spike and wave; sharp wave, sharp and slow wave complex (EEG) | (Kwong et al., 2012; Myers et al., 2017a) |
| T105I            | N-terminal | Missense | DS             | NR                                                                                       | (Wang et al., 2012; Lindy et al., 2018)   |
| S106F (Paternal) | N-terminal | Missense | Focal epilepsy | Right temporal parietal occipital slow-wave and generalized spike-wave complex (EEG)     | (Barba et al., 2014)                      |
| A107D (De novo)  | N-terminal | Missense | DS             | NR                                                                                       | (Ishii et al., 2017)                      |
| L108R            | N-terminal | Missense | DS<br>SMEB     | Generalized tonic-clonic seizures                                                        | (Tang et al., 2011; Zuberi et al., 2011)  |
| L108P            | N-terminal | Missense | DS             | NR                                                                                       | (Xu et al., 2015)                         |
| T112I            | N-terminal | Missense | SME            | Rare spike-wave complex and rare multifocal spikes (EEG)                                 | (Fujiwara, 2003)                          |
| P113T            | N-terminal | Missense | SMEB           | NR                                                                                       | (Xu et al., 2014)                         |
| P113L            | N-terminal | Missense | Epilepsy       | NR                                                                                       | (Lindy et al., 2018)                      |

Supplementary Material

|                        |            |            |                  |                                                                       |                                                                         |
|------------------------|------------|------------|------------------|-----------------------------------------------------------------------|-------------------------------------------------------------------------|
| F114LfsX6<br>(De novo) | N-terminal | FrameShift | SME              | NR                                                                    | (Kodera et al., 2013)                                                   |
| L117QfsX6<br>(De novo) | N-terminal | FrameShift | DS               | NR                                                                    | (Depienne et al., 2008)                                                 |
| R118S (De<br>novo)     | N-terminal | Missense   | DS               | Generalized tonic-<br>clonic seizures<br>Severe mental<br>retardation | (Zucca et al., 2008)                                                    |
| L123RfsX1<br>1         | DIS1       | FrameShift | Epilepsy         | NR                                                                    | (Lindy et al., 2018)                                                    |
| I124N(Mate<br>rnal)    | DIS1       | Missense   | SME              | NR                                                                    | (Depienne et al., 2008)                                                 |
| H127N (De<br>novo)     | DIS1       | Missense   | SMEB<br>DS       | NR                                                                    | (Zuberi et al., 2011; Cetica et<br>al., 2017)                           |
| H127Y (De<br>novo)     | DIS1       | Missense   | GEFS+            | NR                                                                    | (Djémié et al., 2016)                                                   |
| H127L                  | DIS1       | Missense   | DS               | NR                                                                    | (Xu et al., 2015)                                                       |
| S128X (De<br>novo)     | DIS1       | Nonsense   | DS<br>FS+<br>SME | NR                                                                    | (Nabbout et al., 2003; Zuberi<br>et al., 2011; Carvill et al.,<br>2014) |

|                            |      |                      |                          |                                                                       |                                                                                              |
|----------------------------|------|----------------------|--------------------------|-----------------------------------------------------------------------|----------------------------------------------------------------------------------------------|
| L129del<br>(De novo)       | DIS1 | In-frame<br>deletion | DS                       | NR                                                                    | (Riva et al., 2009)                                                                          |
| S131R                      | DIS1 | Missense             | NR                       | NR                                                                    | (Fry et al., 2016)                                                                           |
| C136WfsX<br>14             | DIS1 | FrameShift           | DS                       | NR                                                                    | (Cho et al., 2018)                                                                           |
| I138FfsX11<br>(Paternal)   | DIS1 | FrameShift           | DS                       | NR                                                                    | (Zuberi et al., 2011)                                                                        |
| T140R (De<br>novo)         | DIS1 | Missense             | DS                       | NR                                                                    | (Ishii et al., 2017)                                                                         |
| Val143fsX1<br>6 (De novo)  | DIS1 | FrameShift           | DS                       | NR                                                                    | (Wang et al., 2012)                                                                          |
| Phe144TyrfsX5 (De<br>novo) | DIS1 | Frameshift           | SME<br>DS                | Moderate psychomotor<br>retardation                                   | (Fukuma et al., 2004; Zuberi<br>et al., 2011; Wang et al., 2012;<br>Villeneuve et al., 2014) |
| Met145AspfsX4 (De<br>novo) | DIS1 | Frameshift           | PEFS+                    | Generalized tonic-<br>clonic seizures without<br>any provoked factors | (Yu et al., 2010)                                                                            |
| Met145Val                  | DIS1 | Missense             | DS                       | NR                                                                    | (Xu et al., 2015)                                                                            |
| M145T<br>(Paternal)        | DIS1 | Missense             | Unidentified<br>epilepsy | Decrease current<br>density                                           | (Mantegazza et al., 2005;<br>Colosimo et al., 2007)                                          |

|                 |         |            |            | Shift of steady-state inactivation to more positive values |                        |
|-----------------|---------|------------|------------|------------------------------------------------------------|------------------------|
| M145L           | DIS1    | Missense   | DS         | NR                                                         | (Lindy et al., 2018)   |
| W153X           | D1S1-S2 | Nonsense   | DS<br>SMEB | NR                                                         | (Zuberi et al., 2011)  |
| E158Q           | DIS1-S2 | Missense   | Epilepsy   | NR                                                         | (Lindy et al., 2018)   |
| Y159SfsX1<br>3  | DIS2    | FrameShift | Epilepsy   | NR                                                         | (Lindy et al., 2018)   |
| T162P (De novo) | DIS2    | Missense   | DS         | NR                                                         | (Riva et al., 2009)    |
| T162I           | DIS2    | Missense   | SME        | NR                                                         | (Cetica et al., 2017)  |
| G163E           | DIS2    | Missense   | SME        | NR                                                         | (Hattori et al., 2008) |
| Y165X (De novo) | DIS2    | Nonsense   | DS         | NR                                                         | (Nabbout et al., 2003) |

|                        |         |            |           |                                                   |                                                                        |
|------------------------|---------|------------|-----------|---------------------------------------------------|------------------------------------------------------------------------|
| T166VfsX5<br>(De novo) | DIS2    | FrameShift | DS        | NR                                                | (Harkin et al., 2007)                                                  |
| S169IfsX10<br>8        | DIS2    | FrameShift | SME       | Severe mental<br>retardation<br>Autistic features | (Le Gal et al., 2010; Barba et<br>al., 2014)                           |
| S169P<br>(Mosaic)      | DIS2    | Missense   | DS        | NR                                                | (Yang et al., 2017)                                                    |
| I171L(De<br>novo)      | DIS2    | Missense   | SMEB      | NR                                                | (Harkin et al., 2007)                                                  |
| I171R (De<br>novo)     | DIS2    | Missense   | DS        | NR                                                | (Depienne et al., 2008)                                                |
| A175T (De<br>novo)     | DIS2    | Missense   | SMEB      | NR                                                | (Harkin et al., 2007)                                                  |
| A175V (De<br>novo)     | DIS2    | Missense   | DS        | NR                                                | (Depienne et al., 2008)                                                |
| G177R (De<br>novo)     | DIS2-S3 | Missense   | SME       | NR                                                | (Hattori et al., 2008; Reyes et<br>al., 2011)                          |
| G177DfsX4              | DIS2-S3 | FrameShift | DS        | Generalized tonic-<br>clonic seizures             | (Fujiwara, 2003)                                                       |
| G177E (De<br>novo)     | DIS2-S3 | Missense   | SME<br>DS | Non-functional channel                            | (Nabbout et al., 2003; Ohmori<br>et al., 2006; Usluer et al.,<br>2016) |

|                      |         |            |       |                                                                                      |                                                                      |
|----------------------|---------|------------|-------|--------------------------------------------------------------------------------------|----------------------------------------------------------------------|
| G177Val              | DIS2-S3 | Missense   | DS    | NR                                                                                   | (Cetica et al., 2017)                                                |
| P178Ser              | DIS2-S3 | Missense   | DS    | NR                                                                                   | (Wang et al., 2012)                                                  |
| C179Arg              | DIS2-S3 | Missense   | DS    | NR                                                                                   | (Wang et al., 2012)                                                  |
| L180X (De novo)      | DIS2-S3 | Nonsense   | DS    | Focal spike wave (EEG)                                                               | (Liu et al., 2018)                                                   |
| E181X (Familial)     | DIS2-S3 | Nonsense   | GEFS+ | NR                                                                                   | (Orrico et al., 2009)                                                |
| D182IfsX34 (De novo) | DIS2-S3 | FrameShift | DS    | NR                                                                                   | (Yang et al., 2017)                                                  |
| T184YfsX93           | DIS2-S3 | FrameShift | SMEB  | NR                                                                                   | (Lindy et al., 2018)                                                 |
| D188V (Paternal)     | DIS2-S3 | Missense   | GEFS+ | Resistance to entry into closed state inactivation during high frequency stimulation | (Wallace et al., 2001; Cossette et al., 2003; Rilstone et al., 2012) |
| W190R (Maternal)     | DIS3    | Missense   | DS    | NR                                                                                   | (Fukuma et al., 2004; Wang et al., 2012)                             |

|                 |      |          |                   |                                                                                                          |                                                                                                                                                |
|-----------------|------|----------|-------------------|----------------------------------------------------------------------------------------------------------|------------------------------------------------------------------------------------------------------------------------------------------------|
| W190X (De novo) | DIS3 | Nonsense | DS                | Febrile, partial and generalized tonic-clonic and myo-clonic seizures<br>Severe intellectual disability. | (Marini et al., 2007; Kwong et al., 2012)                                                                                                      |
| N191Y           | DIS3 | Missense | DS                | NR                                                                                                       | (Depienne et al., 2008)                                                                                                                        |
| N191T           | DIS3 | Missense | DS                | NR                                                                                                       | (Ishii et al., 2017)                                                                                                                           |
| N191L           | DIS3 | Missense | DS                | NR                                                                                                       | (Depienne et al., 2008)                                                                                                                        |
| W192X (De novo) | DIS3 | Nonsense | DS                | NR                                                                                                       | (Depienne et al., 2008)                                                                                                                        |
| L193F(Paternal) | DIS3 | Missense | GEFS+             | Generalized tonic-clonic seizures                                                                        | (Cui et al., 2011)                                                                                                                             |
| D194N(De novo)  | DIS3 | Missense | SME<br>DS<br>SMEB | NR                                                                                                       | (Harkin et al., 2007; Riva et al., 2009; Azmanov et al., 2010; Zuberi et al., 2011; Kodera et al., 2013; Cho et al., 2018; Lindy et al., 2018) |
| D194H           | DIS3 | Missense | DS                | NR                                                                                                       | (Zuberi et al., 2011)                                                                                                                          |
| D194G           | DIS3 | Missense | DS                | NR                                                                                                       | (Depienne et al., 2008)                                                                                                                        |

|                 |         |            |      |                                 |                                       |
|-----------------|---------|------------|------|---------------------------------|---------------------------------------|
| D194A           | DIS3    | Missense   | SME  | EEG reveals background slow     | (Lee et al., 2014)                    |
| T199R (De novo) | DIS3    | Missense   | SMEB | NR                              | (Harkin et al., 2007)                 |
| T199SfsX15      | DIS3    | Frameshift | DS   | NR                              | (Cho et al., 2018)                    |
| A201E           | DIS3    | Missense   | DS   | NR                              | (Do et al., 2017; Lindy et al., 2018) |
| Y202X (De novo) | DIS3    | Nonsense   | DS   | NR                              | (Wang et al., 2012)                   |
| V207G           | DIS3    | Missense   | EE   | Early-onset multifocal seizures | (Daoud et al., 2016)                  |
| L209PfsX68      | DIS3-S4 | Frameshift | DS   | NR                              | (Møller et al., 2016)                 |
| G210D           | DIS3-S4 | Missense   | DS   | NR                              | (Ishii et al., 2017)                  |
| V212A           | DIS3-S4 | Missense   | SME  | NR                              | (Hattori et al., 2008)                |



|                             |         |            |                |                                                                                                                                                                  |                                                  |
|-----------------------------|---------|------------|----------------|------------------------------------------------------------------------------------------------------------------------------------------------------------------|--------------------------------------------------|
| S213HfsX9                   | DIS3-S4 | Frameshift | Epilepsy       | NR                                                                                                                                                               | (Lindy et al., 2018)                             |
| S213W (De novo)             | DIS3-S4 | Missense   | Epilepsy       | Febrile and afebrile seizures<br>Developmental delay                                                                                                             | (Butler et al., 2017a)                           |
| L215_R219 delinsfsX         | DIS3-S4 | Frameshift | DS             | NR                                                                                                                                                               | (Ko et al., 2018)                                |
| T217L (De novo)             | DIS4    | Missense   | DS             | NR                                                                                                                                                               | (Riva et al., 2009)                              |
| F218L (Paternal, Maternal)+ | DIS4    | Missense   | GEFS+<br>PEFS+ | Slow wave discharges in left posterior region with occasional generalization; A second EEG reveal multifocal spike and generalized slow wave-spike complex (EEG) | (Livingston et al., 2009; Catarino et al., 2011) |
| R219G (De novo)             | DIS4    | Missense   | DS             | NR                                                                                                                                                               | (Usluer et al., 2016)                            |
| R219T                       | DIS4    | Missense   | Epilepsy       | NR                                                                                                                                                               | (Lindy et al., 2018)                             |
| R219SfsX57 (De novo)        | DIS4    | FrameShift | DS             | Generalized tonic-clonic seizures                                                                                                                                | (Claes et al., 2001)                             |
| V220fsX4                    | DIS4    | FrameShift | SME            | NR                                                                                                                                                               | (Xu et al., 2014)                                |

## Supplementary Material

|                 |      |          |                                                |                       |                                                                                                                                                                                                                     |
|-----------------|------|----------|------------------------------------------------|-----------------------|---------------------------------------------------------------------------------------------------------------------------------------------------------------------------------------------------------------------|
| V220D           | DIS4 | Missense | Malignat migrating partial seizures of infancy | NR                    | (Zhang et al., 2015)                                                                                                                                                                                                |
| L221P           | DIS4 | Missense | Epilepsy                                       | NR                    | (Lindy et al., 2018)                                                                                                                                                                                                |
| R222X (De novo) | DIS4 | Nonsense | DS SMEB                                        | No measurable current | (Claes et al., 2001; Nabbout et al., 2003; Fukuma et al., 2004; Harkin et al., 2007; Depienne et al., 2008; Orrico et al., 2009; Zuberi et al., 2011; Wang et al., 2012; Xu et al., 2014; Esterhuizen et al., 2018) |
| A223E (De novo) | DIS4 | Missense | DS                                             | NR                    | (Depienne et al., 2008)                                                                                                                                                                                             |
| L224S           | DIS4 | Missense | Epilepsy                                       | NR                    | (Lindy et al., 2018)                                                                                                                                                                                                |
| K225N           | DIS4 | Missense | SME                                            | NR                    | (Lee et al., 2014; Xu et al., 2014; Lindy et al., 2018)                                                                                                                                                             |
| T226M (De novo) | DIS4 | Missense | DS                                             | NR                    | (Harkin et al., 2007; Mulley et al., 2013; Dhamija et al., 2014; Muona et al., 2015; Lindy et al., 2018)                                                                                                            |
| T226K           | DIS4 | Missense | SME                                            | NR                    | (Catarino et al., 2011)                                                                                                                                                                                             |

|                      |         |            |             |                                     |                                                                                                                                                |
|----------------------|---------|------------|-------------|-------------------------------------|------------------------------------------------------------------------------------------------------------------------------------------------|
| T226R (De novo)      | DIS4    | Missense   | DS          | NR                                  | (Wang et al., 2012; Lindy et al., 2018)                                                                                                        |
| I227T (De novo)      | DIS4    | Missense   | DS          | NR                                  | (Zuberi et al., 2011)                                                                                                                          |
| I227S (De novo)      | DIS4    | Missense   | SME<br>SMEB | Low current density (no detectable) | (Nabbout et al., 2003; Ohmori et al., 2006; Depienne et al., 2008; Riva et al., 2009; Mak et al., 2011; Wang et al., 2012; Lindy et al., 2018) |
| S228P                | DIS4    | Missense   | DS          |                                     | (Parrini et al., 2017)                                                                                                                         |
| G232S                | DIS4    | Missense   | DS          | NR                                  | (Depienne et al., 2008; Zuberi et al., 2011)                                                                                                   |
| L233EfsX43 (De novo) | DIS4    | FrameShift | DS          | NR                                  | (Petrelli et al., 2012)                                                                                                                        |
| L233G                | DIS4    | Missense   | Epilepsy    | NR                                  | (Lindy et al., 2018)                                                                                                                           |
| L233R (De novo)      | DIS4    | Missense   | DS          | NR                                  | (Zuberi et al., 2011)                                                                                                                          |
| T235S                | DIS4-S5 | Missense   | GEFS+       | NR                                  | (Cetica et al., 2017)                                                                                                                          |

Supplementary Material

|                           |         |                   |           |                                                                                               |                                                               |
|---------------------------|---------|-------------------|-----------|-----------------------------------------------------------------------------------------------|---------------------------------------------------------------|
| I1236LfsX5                | DIS4-S5 | FrameShift        | Epilepsy  | NR                                                                                            | (Lindy et al., 2018)                                          |
| A239T (De novo, Paternal) | DIS4-S5 | Missense          | DS        | NR                                                                                            | (Harkin et al., 2007; Sun et al., 2008a; Cetica et al., 2017) |
| A239V (De novo)           | DIS4-S5 | Missense          | SME<br>DS | Focal right fronto-temporal spikes with spreading (EEG)                                       | (Iannetti et al., 2009; Nicita et al., 2010; Xu et al., 2014) |
| S243Y                     | DIS4-S5 | Missense          | SME       | NR                                                                                            | (Depienne et al., 2008; Xu et al., 2014)                      |
| S243F                     | DIS4-S5 | Missense          | SME       | Slow background, focal spikes and generalized epileptiform discharges (EEG)                   | (Lee et al., 2014)                                            |
| V244L (Maternal)          | DIS4-S5 | Missense          | DS        | Myoclonic seizures and generalized spikes or spike-and-wave complexes in the interictal (EEG) | (Morimoto et al., 2006)                                       |
| V244EfsX3 2 (De novo)     | DIS4-S5 | FrameShift        | DS        | NR                                                                                            | (Marini et al., 2007)                                         |
| L247del                   | DIS4-S5 | In-frame Deletion | Epilepsy  | NR                                                                                            | (Lindy et al., 2018)                                          |
| D249E                     | DIS4-S5 | Missense          | DS        | Generalized tonic seizures; Absences<br>Mental retardation                                    | (Le Gal et al., 2014)                                         |

|                 |         |            |          |                                                                           |                                             |
|-----------------|---------|------------|----------|---------------------------------------------------------------------------|---------------------------------------------|
| V250I           | DIS4-S5 | Missense   | Epilepsy | NR                                                                        | (Retterer et al., 2016; Lindy et al., 2018) |
| M251X           | DIS5    | Nonsense   | SME      | NR                                                                        | (Xu et al., 2014)                           |
| I252N           | DIS5    | Missense   | DS       | NR                                                                        | (Ceulemans et al., 2004)                    |
| I252M           | DIS5    | Missense   | Epilepsy | NR                                                                        | (Wang et al., 2012)                         |
| T254CfsX4       | DIS5    | FrameShift | DS       | Moderate intellectual disability<br>Slow speaking<br>Spasticity<br>Ataxia | (Martin et al., 2010)                       |
| T254I           | DIS5    | Missense   | FS+      | NR                                                                        | (Zuberi et al., 2011)                       |
| F256LfsX2<br>0  | DIS5    | FrameShift | Epilepsy | NR                                                                        | (Hesse et al., 2018)                        |
| C257R           | DIS5    | Missense   | SME      | NR                                                                        | (Xu et al., 2014; Lindy et al., 2018)       |
| S259R (De novo) | DIS5    | Missense   | DS       | NR                                                                        | (Sun et al., 2010; Wang et al., 2012)       |

## Supplementary Material

|                         |      |            |          |                                                                                                                                                                                          |                                                                 |
|-------------------------|------|------------|----------|------------------------------------------------------------------------------------------------------------------------------------------------------------------------------------------|-----------------------------------------------------------------|
| F261IfsX16<br>(De novo) | DIS5 | FrameShift | DS       | NR                                                                                                                                                                                       | (Yang et al., 2017)                                             |
| L263V<br>(Paternal)     | DIS5 | Missense   | FHM      | Shift steady-state activation to more negative values<br>Slightly resists to entry into the fast inactivation state and slow inactivated state<br>Accelerated recovery from inactivation | (Kahlig et al., 2008; Castro et al., 2009; Barros et al., 2014) |
| K263X (De novo)         | DIS5 | Nonsense   | DS       | NR                                                                                                                                                                                       | (Zuberi et al., 2011)                                           |
| I264fs                  | DIS5 | FrameShift | SME      | NR                                                                                                                                                                                       | (Lee et al., 2014)                                              |
| I264T                   | DIS5 | Missense   | Epilepsy | NR                                                                                                                                                                                       | (Lindy et al., 2018)                                            |
| G265W (De novo)         | DIS5 | Missense   | DS       | NR                                                                                                                                                                                       | (Depienne et al., 2008)                                         |
| Q267X (De novo)         | DIS5 | Nonsense   | DS       | NR                                                                                                                                                                                       | (Wang et al., 2012)                                             |
| G271R                   | DIS5 | Missense   | DS       | NR                                                                                                                                                                                       | (Cetica et al., 2017)                                           |

|                 |         |            |          |                                                     |                                                             |
|-----------------|---------|------------|----------|-----------------------------------------------------|-------------------------------------------------------------|
| L273Q           | DIS5    | Missense   | DS       | NR                                                  | (Cho et al., 2018)                                          |
| L273P           | DIS5    | Missense   | Epilepsy | NR                                                  | (Lindy et al., 2018)                                        |
| N275K           | DIS5    | Missense   | PEFS+    | Hippocampa volume loss (MRI)                        | (Kim et al., 2014)                                          |
| K276VfsX2       | DIS5    | FrameShift | DS       | NR                                                  | (Xu et al., 2015)                                           |
| K276Q           | DIS5    | Missense   | DS       | NR                                                  | (Xu et al., 2015)                                           |
| K276I           | DIS5    | Missense   | Epilepsy | NR                                                  | (Lindy et al., 2018)                                        |
| C277R (De novo) | DIS5    | Missense   | DS       | NR                                                  | (Depienne et al., 2008)                                     |
| C277G           | DIS5-S6 | Missense   | DS       | NR                                                  | (Pérez Delgado et al., 2010)                                |
| Q279X (De novo) | DIS5-S6 | Nonsense   | SMEB     | NR                                                  | (Zuberi et al., 2011)                                       |
| W280R (De novo) | DIS5-S6 | Missense   | DS       | Febrile seizures<br>Status epilepticus<br>Myoclonic | (Nabbout et al., 2003; Wang et al., 2012; Liu et al., 2018) |

## Supplementary Material

|                           |         |            |     |                                                          |                                                                  |
|---------------------------|---------|------------|-----|----------------------------------------------------------|------------------------------------------------------------------|
|                           |         |            |     | Multifocal discharges (EEG)                              |                                                                  |
| W280C                     | DIS5-S6 | Missense   | DS  | Sporadic, diffuse, irregular spike-wave complex (EEG)    | (Miyama et al., 2008; Villeneuve et al., 2014)                   |
| W281R (De novo)           | DIS5-S6 | Missense   | SME | NR                                                       | (Xu et al., 2014)                                                |
| P281S                     | DIS5-S6 | Missense   | DS  | NR                                                       | (Depienne et al., 2008)                                          |
| P281A                     | DIS5-S6 | Missense   | DS  | NR                                                       | (Wang et al., 2012)                                              |
| P281L (De novo)           | DIS5-S6 | Missense   | DS  | Moderate mental retardation                              | (Depienne et al., 2008; Gokben et al., 2017; Lindy et al., 2018) |
| S286WfsX6 (De novo)       | DIS5-S6 | FrameShift | DS  | NR                                                       | (Nabbout et al., 2003; Riva et al., 2009)                        |
| E289X (De novo, Maternal) | DIS5-S6 | Nonsense   | DS  | NR                                                       | (Nabbout et al., 2003; Orrico et al., 2009)                      |
| E289V                     | DIS5-S6 | Missense   | DS  | Generalized tonic-clonic seizures<br>Developmental delay | (Lemke et al., 2012)                                             |



|                     |         |            |           |                                                                                              |                                              |
|---------------------|---------|------------|-----------|----------------------------------------------------------------------------------------------|----------------------------------------------|
| H290R               | DIS5-S6 | Missense   | DS        | NR                                                                                           | (Wang et al., 2012)                          |
| S291G               | DIS5-S6 | Missense   | GEFS+     | NR                                                                                           | (Zuberi et al., 2011)                        |
| T297I<br>(Maternal) | DIS5-S6 | Missense   | DS        | In association with R1525Q provokes shift in steady state activation to more positive values | (Nabbout et al., 2003; Binini et al., 2017)  |
| V298EfsX3           | DIS5-S6 | FrameShift | SME<br>DS | Haploinsufficiency                                                                           | (Zuberi et al., 2011; Petrelli et al., 2012) |
| N299fsX3            | DIS5-S6 | FrameShift | SME       | NR                                                                                           | (Xu et al., 2014)                            |
| N306Metfs<br>X26    | DIS5-S6 | FrameShift | DS        | NR                                                                                           | (Wang et al., 2012)                          |
| F310fsX1            | DIS5-S6 | FrameShift | SME       | NR                                                                                           | (Xu et al., 2014)                            |
| E311ValfsX<br>22    | DIS5-S6 | FrameShift | DS        | NR                                                                                           | (Xu et al., 2015)                            |
| E311X (De<br>novo)  | DIS5-S6 | Nonsense   | DS        | Haploinsufficiency                                                                           | (Orrico et al., 2009)                        |

## Supplementary Material

|                                   |         |                     |                                  |    |                         |
|-----------------------------------|---------|---------------------|----------------------------------|----|-------------------------|
| F312S                             | DIS5-S6 | Missense            | DS                               | NR | (Ishii et al., 2017)    |
| D313fs                            | DIS5-S6 | FrameShift          | SME                              | NR | (Lee et al., 2014)      |
| W314R<br>(Maternal)               | DIS5-S6 | Missense            | Myoclonic-<br>atonic<br>epilepsy | NR | (Zuberi et al., 2011)   |
| W314G                             | DIS5-S6 | Missense            | GEFS+                            | NR | (Afawi et al., 2016)    |
| W314X                             | DIS5-S6 | Nonsense            | Epilepsy                         | NR | (Lindy et al., 2018)    |
| Y317H                             | DIS5-S6 | Missense            | SME                              | NR | (Lee et al., 2014)      |
| Y317C                             | DIS5-S6 | Missense            | DS                               | NR | (Cetica et al., 2017)   |
| D320_R322<br>delinsG (De<br>novo) | DIS5-S6 | Slice donor<br>site | DS                               | NR | (Depienne et al., 2008) |
| S321X (De<br>novo)                | DIS5-S6 | Nonsense            | DS                               | NR | (Depienne et al., 2008) |

|                          |         |                   |     |                                                                   |                                              |
|--------------------------|---------|-------------------|-----|-------------------------------------------------------------------|----------------------------------------------|
| R322I                    | DIS5-S6 | Missense          | DS  | NR                                                                | (Marini et al., 2007; Depienne et al., 2008) |
| Y323X (De novo)          | DIS5-S6 | Nonsense          | DS  | NR                                                                | (Riva et al., 2009; Nicita et al., 2010)     |
| H324N                    | DIS5-S6 | Missense          | DS  | NR                                                                | (Ishii et al., 2017)                         |
| H324P (Mosaic, Maternal) | DIS5-S6 | Missense          | DS  | NR                                                                | (Yang et al., 2017)                          |
| Y325C (De novo)          | DIS5-S6 | Missense          | SME | NR                                                                | (Liu et al., 2013)                           |
| Y325del                  | DIS5-S6 | In-Frame Deletion | DS  | NR                                                                | (Wu et al., 2015)                            |
| Y325X                    | DIS5-S6 | Nonsense          | SME | NR                                                                | (Liu et al., 2013)                           |
| L327R (Mosaic)           | DIS5-S6 | Missense          | DS  | Generalized tonic-clonic seizures                                 | (de Lange et al., 2018)                      |
| E328GfsX1<br>2           | DIS5-S6 | FrameShift        | DS  | Generalized tonic-clonic seizures<br>Hemicconvulsion<br>Absences. | (de Lange et al., 2018)                      |

## Supplementary Material

|                      |         |            |             |                          |                                             |
|----------------------|---------|------------|-------------|--------------------------|---------------------------------------------|
| G329C                | DIS5-S6 | Missense   | Epilepsy    | NR                       | (Lindy et al., 2018)                        |
| G329A (De novo)      | DIS5-S6 | Missense   | GEFS+       | Generalized tonic-clonic | (Myers et al., 2017a)                       |
| L331fsX (De novo)    | DIS5-S6 | FrameShift | SME<br>SMEB | NR                       | (Zuberi et al., 2011; Verbeek et al., 2013) |
| L331FefsX9 (De novo) | DIS5-S6 | FrameShift | DS          | NR                       | (Riva et al., 2009)                         |
| D332G                | DIS5-S6 | Missense   | Epilepsy    | NR                       | (Lindy et al., 2018)                        |
| C336Y                | DIS5-S6 | Missense   | SME<br>DS   | NR                       | (Xu et al., 2014)                           |
| G337E                | DIS5-S6 | Missense   | DS          | NR                       | (Ishii et al., 2017)                        |
| S340F                | DIS5-S6 | Missense   | DS          | NR                       | (Depienne et al., 2008)                     |
| A342S                | DIS5-S6 | Missense   | DS          | NR                       | (Xu et al., 2015)                           |

|                 |         |            |                   |                                                                                                    |                                                              |
|-----------------|---------|------------|-------------------|----------------------------------------------------------------------------------------------------|--------------------------------------------------------------|
| A342V (De novo) | DIS5-S6 | Missense   | DS<br>SME         | NR                                                                                                 | (Zuberi et al., 2011; Xu et al., 2014)                       |
| G343R           | DIS5-S6 | Missense   | DS                | NR                                                                                                 | (Ishii et al., 2017)                                         |
| G343C           | DIS5-S6 | Missense   | DS                | NR                                                                                                 | (Ishii et al., 2017)                                         |
| G343E (De novo) | DIS5-S6 | Missense   | SMEB<br>SME<br>DS | Spike-wave complex and multifocal spikes (EEG)<br><br>Photo and pattern sensitivity                | (Fujiwara, 2003; Depienne et al., 2008; Zuberi et al., 2011) |
| C345VfsX8       | DIS5-S6 | FrameShift | DS                | NR                                                                                                 | (Harkin et al., 2007; Depienne et al., 2008)                 |
| C345R (De novo) | DIS5-S6 | Missense   | DS                | NR                                                                                                 | (Depienne et al., 2008)                                      |
| C345Y           | DIS5-S6 | Missense   | DS                | Moderate intellectual disability<br><br>Slow speaking<br>Dysarthrophonia<br>Bradykinesia<br>Ataxia | (Martin et al., 2010)                                        |
| C345X (De novo) | DIS5-S6 | Nonsense   | DS                | NR                                                                                                 | (Zuberi et al., 2011)                                        |
| C345W (De novo) | DIS5-S6 | Missense   | DS                | NR                                                                                                 | (Zuberi et al., 2011)                                        |

|                     |         |            |           |    |                                        |
|---------------------|---------|------------|-----------|----|----------------------------------------|
| G348X (De novo)     | DIS5-S6 | Nonsense   | DS        | NR | (Riva et al., 2009)                    |
| M350VfsX6 (De novo) | DIS5-S6 | FrameShift | DS        | NR | (Harkin et al., 2007)                  |
| M350V               | DIS5-S6 | Missense   | DS        | NR | (Xu et al., 2015)                      |
| C351R               | DIS5-S6 | Missense   | DS        | NR | (Doccini et al., 2015)                 |
| C351W (De novo)     | DIS5-S6 | Missense   | DS        | NR | (Zuberi et al., 2011)                  |
| C351X               | DIS5-S6 | Nonsense   | DS        | NR | (Kwong et al., 2012)                   |
| V352CfsX5           | DIS5-S6 | FrameShift | Epilepsy  | NR | (Lindy et al., 2018)                   |
| K353fsX (De novo)   | DIS5-S6 | FrameShift | DS        | NR | (Zuberi et al., 2011)                  |
| V352EfsX4 (De novo) | DIS5-S6 | FrameShift | SME<br>DS | NR | (Harkin et al., 2007; Xu et al., 2014) |

|                 |         |            |             |    |                                                                                    |
|-----------------|---------|------------|-------------|----|------------------------------------------------------------------------------------|
| G355D (De novo) | DIS5-S6 | Missense   | DS          | NR | (Depienne et al., 2008)                                                            |
| R356G           | DIS5-S6 | Missense   | SMEB        | NR | (Marini et al., 2007)                                                              |
| R356X           | DIS5-S6 | Nonsense   | DS          | NR | (Ishii et al., 2017)                                                               |
| N357Y           | DIS5-S6 | Missense   | DS          | NR | (Cho et al., 2018)                                                                 |
| N357I (De novo) | DIS5-S6 | Missense   | DS          | NR | (Depienne et al., 2008)                                                            |
| P358T           | DIS5-S6 | Missense   | SMEB<br>SME | NR | (Marini et al., 2007; Xu et al., 2014)                                             |
| P358S           | DIS5-S6 | Missense   | DS          | NR | (Xu et al., 2014)                                                                  |
| N359S (De novo) | DIS5-S6 | Missense   | DS          | NR | (Zuberi et al., 2011; Dhamija et al., 2014; Xu et al., 2014; Butler et al., 2017a) |
| N359IfsX20      | DIS5-S6 | FrameShift | DS          | NR | (Wang et al., 2012)                                                                |
| N359I           | DIS5-S6 | Missense   | Epilepsy    | NR | (Lindy et al., 2018)                                                               |

## Supplementary Material

|                      |         |            |          |                                   |                                            |
|----------------------|---------|------------|----------|-----------------------------------|--------------------------------------------|
| N359K (De novo)      | DIS5-S6 | Missense   | DS       | NR                                | (Yang et al., 2017)                        |
| T363P                | DIS5-S6 | Missense   | DS       | NR                                | (Zuberi et al., 2011)                      |
| Thr363Arg            | DIS5-S6 | Missense   | DS       | Generalized tonic-clonic seizures | (Zuberi et al., 2011; Le Gal et al., 2014) |
| S364AfsX15 (De novo) | DIS5-S6 | FrameShift | DS       | NR                                | (Zuberi et al., 2011)                      |
| F365LfsX14 (De novo) | DIS5-S6 | Missense   | DS       | NR                                | (Yang et al., 2017)                        |
| D366X (De novo)      | DIS5-S6 | Nonsense   | DS       | NR                                | (Depienne et al., 2008)                    |
| D366fsX76            | DIS5-S6 | FrameShift | SME      | NR                                | (Xu et al., 2014)                          |
| D366E (De novo)      | DIS5-S6 | Missense   | DS       | Generalized tonic-clonic seizures | (Zucca et al., 2008)                       |
| A371V                | DIS5-S6 | Missense   | Epilepsy | NR                                | (Lindy et al., 2018)                       |



|                       |         |            |       |                                                                              |                                                                                                                                                                        |
|-----------------------|---------|------------|-------|------------------------------------------------------------------------------|------------------------------------------------------------------------------------------------------------------------------------------------------------------------|
| L373FfsX6             | DIS5-S6 | FrameShift | PEFS+ | Mild ventricular dilatation (MRI)<br>Developmental delay                     | (Kim et al., 2014)                                                                                                                                                     |
| S374fsX5<br>(De novo) | DIS5-S6 | FrameShift | DS    | NR                                                                           | (Nabbout et al., 2003)                                                                                                                                                 |
| S374Y (De novo)       | DIS5-S6 | Missense   | DS    | NR                                                                           | (Djémié et al., 2016)                                                                                                                                                  |
| L375F (De novo)       | DIS5-S6 | Missense   | DS    | NR                                                                           | (Wei et al., 2018)                                                                                                                                                     |
| R377X (De novo)       | DIS5-S6 | Nonsense   | DS    | NR                                                                           | (Depienne et al., 2008; Riva et al., 2009; Zuberi et al., 2011; Wang et al., 2012; Gaily et al., 2013; Xu et al., 2014; Djémié et al., 2016; Esterhuizen et al., 2018) |
| R377L                 | DIS5-S6 | Missense   | SME   | NR                                                                           | (Hattori et al., 2008)                                                                                                                                                 |
| R377Q<br>(Maternal)   | DIS5-S6 | Missense   | GEFS+ | Generalized tonic-clonic seizures                                            | (Zucca et al., 2008; Xu et al., 2015; Cetica et al., 2017)                                                                                                             |
| L378Q                 | DIS5-S6 | Missense   | DS    | NR                                                                           | (Depienne et al., 2008)                                                                                                                                                |
| M379R                 | DIS5-S6 | Missense   | DS    | Generalized tonic-clonic seizures<br>Partial seizures<br>Developmental delay | (Lemke et al., 2012)                                                                                                                                                   |

## Supplementary Material

|                 |         |            |                   |                                                                |                                                                |
|-----------------|---------|------------|-------------------|----------------------------------------------------------------|----------------------------------------------------------------|
| M379K           | DIS5-S6 | Missense   | DS                | NR                                                             | (Xu et al., 2015)                                              |
| T380IfsX11      | DIS5-S6 | FrameShift | Epilepsy          | NR                                                             | (Lindy et al., 2018)                                           |
| D382N (De novo) | DIS5-S6 | Missense   | SME               | NR                                                             | (Zuberi et al., 2011)                                          |
| D382R           | DIS5-S6 | Missense   | DS                | NR                                                             | (Xu et al., 2014)                                              |
| F383D (De novo) | DIS5-S6 | Missense   | DS                | NR                                                             | (Riva et al., 2009)                                            |
| W384R (De novo) | DIS5-S6 | Missense   | DS<br>SMEB<br>SME | Generalized tonic-clonic seizures<br>Partial seizures          | (Zuberi et al., 2011; Wang et al., 2012; Verbeek et al., 2013) |
| W384X           | DIS5-S6 | Nonsense   | DS                | Complex partial seizures with generalization<br>Tonic seizures | (Surovy et al., 2016)                                          |
| E385K           | DIS5-S6 | Missense   | SMEB              | NR                                                             | (Harkin et al., 2007)                                          |
| E385G(De novo)  | DIS5-S6 | Missense   | DS                | NR                                                             | (Petrelli et al., 2012; Ko et al., 2018)                       |

|                      |         |            |                   |                                                       |                                                                                                                                                                       |
|----------------------|---------|------------|-------------------|-------------------------------------------------------|-----------------------------------------------------------------------------------------------------------------------------------------------------------------------|
| E385V                | DIS5-S6 | Missense   | DS                | NR                                                    | (Doccini et al., 2015)                                                                                                                                                |
| E385D (De novo)      | DIS5-S6 | Missense   | DS                | NR                                                    | (Wu et al., 2015)                                                                                                                                                     |
| N386KfsX64 (De novo) | DIS5-S6 | FrameShift | DS                | NR                                                    | (Wang et al., 2012)                                                                                                                                                   |
| Y388H (Paternal)     | DIS5-S6 | Missense   | DS<br>GEFS+       | NR                                                    | (Mahoney et al., 2009; Bennett et al., 2017)                                                                                                                          |
| Q389X                | DIS5-S6 | Nonsense   | DS                | NR                                                    | (Nabbout et al., 2003)                                                                                                                                                |
| T391P (De novo)      | DIS5-S6 | Missense   | DS                | Generalized tonic-clonic seizures<br>Partial Seizures | (Reyes et al., 2011)                                                                                                                                                  |
| R393TfsX57           | DIS5-S6 | FrameShift | DS                | NR                                                    | (Zuberi et al., 2011)                                                                                                                                                 |
| L392F                | DIS5-S6 | Missense   | DS                | NR                                                    | (Ishii et al., 2017)                                                                                                                                                  |
| R393C (De novo)      | DIS5-S6 | Missense   | DS<br>LGS<br>SMEB | NR                                                    | (Harkin et al., 2007; Marini et al., 2007; Riva et al., 2009; Lim et al., 2011; Zuberi et al., 2011; Kwong et al., 2012; Allen et al., 2013; Villeneuve et al., 2014) |

## Supplementary Material

|                     |         |            |                                        |                                                                                                          |                                                                                                                                                                                                             |
|---------------------|---------|------------|----------------------------------------|----------------------------------------------------------------------------------------------------------|-------------------------------------------------------------------------------------------------------------------------------------------------------------------------------------------------------------|
| R393S (De novo)     | DIS5-S6 | Missense   | DS<br>Myoclonic<br>astatic<br>epilepsy | NR                                                                                                       | (Harkin et al., 2007; Marini et al., 2007; Depienne et al., 2008; Riva et al., 2009)                                                                                                                        |
| R393H (De novo)     | DIS5-S6 | Missense   | DS<br>SMEB                             | Generalized tonic-clonic seizures<br>Myoclonus<br>Febrile seizures<br>Developmental delay                | (Claes et al., 2003; Marini et al., 2007; Sun et al., 2010; Zuberi et al., 2011; Lemke et al., 2012; Rilstone et al., 2012; Wang et al., 2012; Xu et al., 2014; Djémié et al., 2016; Haginoya et al., 2018) |
| R393L               | DIS5-S6 | Missense   | DS                                     | NR                                                                                                       | (Cetica et al., 2017)                                                                                                                                                                                       |
| A394D               | DIS5-S6 | Missense   | GEFS+                                  | Mild proeminence of lateral ventricles (MRI)<br>Developmental delay<br>Generalized tonic-clonic seizures | (Myers et al., 2017a)                                                                                                                                                                                       |
| A395SfsX5<br>5      | DIS5-S6 | FrameShift | DS                                     | NR                                                                                                       | (Xu et al., 2015)                                                                                                                                                                                           |
| A395P (De novo)     | DIS5-S6 | Missense   | Cryptogenic focal epilepsy             | NR                                                                                                       | (Harkin et al., 2007)                                                                                                                                                                                       |
| A395MfsX6 (De novo) | DIS5-S6 | FrameShift | DS                                     | NR                                                                                                       | (Sun et al., 2010)                                                                                                                                                                                          |
| G396E (De novo)     | DIS5-S6 | Missense   | DS                                     | NR                                                                                                       | (Lim et al., 2011)                                                                                                                                                                                          |

|                   |         |                   |                   |                                                                             |                                                                    |
|-------------------|---------|-------------------|-------------------|-----------------------------------------------------------------------------|--------------------------------------------------------------------|
| T398RfsX3         | DIS5-S6 | FrameShift        | Epilepsy          | NR                                                                          | (Lindy et al., 2018)                                               |
| Y399D             | DIS5-S6 | Missense          | Epilepsy          | NR                                                                          | (Lindy et al., 2018)                                               |
| Y399F             | DIS5-S6 | Missense          | GEFS+             | Focal seizures with secondary generalization arising from hemispheres (EEG) | (Gauthier et al., 2017)                                            |
| Y399X (De novo)   | DIS5-S6 | Nonsense          | DS                | NR                                                                          | (Harkin et al., 2007)                                              |
| M400DfsX49        | DIS5-S6 | Missense          | DS                | NR                                                                          | (Xu et al., 2015)                                                  |
| M400del (De novo) | DIS6    | In-frame Deletion | SME<br>DS<br>SMEB | NR                                                                          | (Ceulemans et al., 2004; Depienne et al., 2008; Wang et al., 2012) |
| M400K             | DIS6    | Missense          | DS                | NR                                                                          | (Xu et al., 2015)                                                  |
| M400V             | DIS6    | Missense          | GEFS+             | NR                                                                          | (Brunklau et al., 2015)                                            |
| F402L (Mosaic)    | DIS6    | Missense          | Epilepsy          | NR                                                                          | (Stosser et al., 2018)                                             |

|                     |      |            |               |                 |                                                     |
|---------------------|------|------------|---------------|-----------------|-----------------------------------------------------|
| F403L (De novo)     | DIS6 | Missense   | DS            | NR              | (Harkin et al., 2007)                               |
| V406F               | DIS6 | Missense   | DS            | NR              | (Zuberi et al., 2011)                               |
| V404CfsX4<br>6      | DIS6 | FrameShift | DS            | NR              | (Ream and Mikati, 2014;<br>Mahdich et al., 2018)    |
| F408L               | DIS6 | Missense   | Epilepsy      | NR              | (Klassen et al., 2011)                              |
| L409W(Maternal)     | DIS6 | Missense   | DS            | NR              | (Wang et al., 2012)                                 |
| G408WfsX<br>6       | DIS6 | FrameShift | DS            | NR              | (Cetica et al., 2017)                               |
| F412I<br>(Paternal) | DIS6 | Missense   | SMEB<br>GEFS+ | Febrile seizure | (Ebrahimi et al., 2010;<br>Tonekaboni et al., 2013) |
| Y413N (De novo)     | DIS6 | Missense   | DS            | NR              | (Harkin et al., 2007; Mulley et al., 2013)          |
| I415K (De novo)     | DIS6 | Missense   | Epilepsy      | NR              | (Staněk et al., 2018)                               |

|                    |      |            |          |                                 |                                            |
|--------------------|------|------------|----------|---------------------------------|--------------------------------------------|
| N416IfsX2          | DIS6 | FrameShift | DS       | NR                              | (Zuberi et al., 2011)                      |
| N416KfsX2          | DIS6 | FrameShift | Epilepsy | NR                              | (Lindy et al., 2018)                       |
| N416I              | DIS6 | Missense   | DS       | Focal spike-wave (EEG)          | (Zhou et al., 2018)                        |
| L417X              | DIS6 | Nonsense   | DS       | NR                              | (Ishii et al., 2017)                       |
| A420WfsX<br>27     | DIS6 | FrameShift | DS       | NR                              | (Zuberi et al., 2011)                      |
| A420V (De<br>novo) | DIS6 | Missense   | GEFS+    | NR                              | (Xu et al., 2015)                          |
| A420D              | DIS6 | Missense   | Epilepsy | NR                              | (Butler et al., 2017a)                     |
| V421M              | DIS6 | Missense   | DS       | NR                              | (Trujillano et al., 2017)                  |
| V422M(De<br>novo)  | DIS6 | Missense   | DS       | NR                              | (Kwong et al., 2012; Butler et al., 2017a) |
| V422Le(De<br>novo) | DIS6 | Missense   | EE       | Psychomotor developmental delay | (Ohashi et al., 2014)                      |

|                 |        |          |                                  | Theta activities with right predominance (EEG)                                                                                                                       |                                                                 |
|-----------------|--------|----------|----------------------------------|----------------------------------------------------------------------------------------------------------------------------------------------------------------------|-----------------------------------------------------------------|
| V422E(De novo)  | DIS6   | Missense | Cryptogenic generalized epilepsy | NR                                                                                                                                                                   | (Harkin et al., 2007)                                           |
| V422A           | DIS6   | Missense | DS                               | NR                                                                                                                                                                   | (Xu et al., 2015)                                               |
| Y426N(De novo)  | DI-DII | Missense | DS                               | Reduced current density<br>Shift steady state inactivation to more negative values<br>Larger time constant for the slow component of recovery from fast inactivation | (Nabbout et al., 2003; Ohmori et al., 2006; Allen et al., 2016) |
| Y426C (De novo) | DI-DII | Missense | DS                               | NR                                                                                                                                                                   | (Depienne et al., 2008; Wang et al., 2012)                      |
| Y426X           | DI-DII | Nonsense | DS                               | NR                                                                                                                                                                   | (Hesse et al., 2018)                                            |
| E427K           | DI-DII | Missense | DS                               | NR                                                                                                                                                                   | (Cho et al., 2018)                                              |
| E431X           | DI-DII | Nonsense | DS                               | NR                                                                                                                                                                   | (Zuberi et al., 2011)                                           |
| A432S           | DI-DII | Missense | DS                               | NR                                                                                                                                                                   | (Usluer et al., 2016)                                           |



|                          |        |            |                                  |                                                                                                      |                                               |
|--------------------------|--------|------------|----------------------------------|------------------------------------------------------------------------------------------------------|-----------------------------------------------|
| L433fsX16<br>(De novo)   | DI-DII | FrameShift | Myoclonic<br>astatic<br>epilepsy | Severe idiopathic<br>generalized epilepsy of<br>infancy with<br>generalized tonic-clonic<br>seizures | (Ebach et al., 2005)                          |
| L434WfsX1<br>4           | DI-DII | FrameShift | DS                               | NR                                                                                                   | (Xu et al., 2015)                             |
| E435X (De<br>novo)       | DI-DII | Nonsense   | DS                               | Mild psychomotor<br>retardation<br>Myoclonic seizures<br>Atypical absence                            | (Fukuma et al., 2004; Wang et<br>al., 2012)   |
| Q439X (De<br>novo)       | DI-DII | Nonsense   | DS                               | NR                                                                                                   | (Depienne et al., 2008; Wang<br>et al., 2012) |
| E443X                    | DI-DII | Nonsense   | DS                               | Multifocal Discharges<br>Generalized polyspike-<br>wave (EEG)                                        | (Liu et al., 2018)                            |
| Q445X                    | DI-DII | Nonsene    | DS                               | NR                                                                                                   | (Surovy et al., 2016)                         |
| I448X (De<br>novo)       | DI-DII | Nonsense   | DS                               | NR                                                                                                   | (Wallace et al., 2003)                        |
| E449X                    | DI-DII | Nonsense   | DS                               | NR                                                                                                   | (Xu et al., 2015)                             |
| E449DfsX4<br>1 (De novo) | DI-DII | FrameShift | Epilepsy                         | NR                                                                                                   | (Lindy et al., 2018)                          |

Supplementary Material

|                      |        |            |             |                                                                                                                    |                                                                               |
|----------------------|--------|------------|-------------|--------------------------------------------------------------------------------------------------------------------|-------------------------------------------------------------------------------|
| Q450X (De novo)      | DI-DII | Nonsense   | DS          | NR                                                                                                                 | (Depienne et al., 2008; Kwong et al., 2012; Mercimek-Mahmutoglu et al., 2015) |
| E450GfsX10 (De novo) | DI-DII | FrameShift | DS          | NR                                                                                                                 | (Orrico et al., 2009)                                                         |
| Q459R(De novo)       | DI-DII | Missense   | DS<br>GEFS+ | NR                                                                                                                 | (Møller et al., 2016)                                                         |
| Q460X                | DI-DII | Nonsense   | DS          | NR                                                                                                                 | (Zuberi et al., 2011)                                                         |
| S470FfsX17 (De novo) | DI-DII | FrameShift | DS          | NR                                                                                                                 | (Depienne et al., 2008)                                                       |
| S470fsX15 (De novo)  | DI-DII | FrameShift | DS          | NR                                                                                                                 | (Sun et al., 2010)                                                            |
| G477AfsX13           | DI-DII | FrameShift | Epilepsy    | NR                                                                                                                 | (Lindy et al., 2018)                                                          |
| D481AfsX8            | DI-DII | FrameShift | SME         | NR                                                                                                                 | (Xu et al., 2015)                                                             |
| S487EfsX6 (Mosaic)   | DI-DII | FrameShift | DS          | Generalized tonic-clonic seizure<br>Focal seizures with secondary generalization<br>Mild motor and cognitive delay | (Sharkia et al., 2016)                                                        |

|                      |        |            |           |    |                                   |
|----------------------|--------|------------|-----------|----|-----------------------------------|
| K488EfsX6 (Maternal) | DI-DII | FrameShift | DS        | NR | (Yang et al., 2017)               |
| R498X (De novo)      | DI-DII | Nonsense   | DS        | NR | (Depienne et al., 2008)           |
| R500EfsX10 (De novo) | DI-DII | FrameShift | DS        | NR | (Wang et al., 2012)               |
| R500EfsX (De novo)   | DI-DII | FrameShift | DS        | NR | (Wang et al., 2012)               |
| R500Q                | DI-DII | Missense   | DS        | NR | (Zhou et al., 2018)               |
| R501fsX43 (De novo)  | DI-DII | FrameShift | SMEB      | NR | (Ohmori et al., 2002)             |
| R504TfsX12           | DI-DII | FrameShift | SME       | NR | (Villeneuve et al., 2014)         |
| K505X (De novo)      | DI-DII | Nonsense   | DS        | NR | (Liu et al., 2018)                |
| Q506X                | DI-DII | Nonsense   | SME<br>DS | NR | (Cantarín Extremera et al., 2011) |
| K507AfsX9            | DI-DII | FrameShift | Epilepsy  | NR | (Lindy et al., 2018)              |

|                                      |        |            |          |    |                           |
|--------------------------------------|--------|------------|----------|----|---------------------------|
| K507SfsX3<br>6                       | DI-DII | FrameShift | SME      | NR | (Villeneuve et al., 2014) |
| Q509X (De<br>novo)                   | DI-DII | Nonsense   | Epilepsy | NR | (Staněk et al., 2018)     |
| E511fsX54<br>3                       | DI-DII | FrameShift | DS       | NR | (Wang et al., 2012)       |
| E513KfsX3<br>1 (Paternal,<br>Mosaic) | DI-DII | FrameShift | DS       | NR | (Verbeek et al., 2011)    |
| E513X                                | DI-DII | Nonsense   | DS       | NR | (Depienne et al., 2008)   |
| E513GfsX5                            | DI-DII | FrameShift | Epilepsy | NR | (Lindy et al., 2018)      |
| E524X                                | DI-DII | Nonsense   | Epilepsy | NR | (Lindy et al., 2018)      |
| S525F(De<br>novo)                    | DI-DII | Missense   | DS       | NR | (Depienne et al., 2008)   |
| Y525LfsX2                            | DI-DII | FrameShift | DS       | NR | (Cetica et al., 2017)     |

|                      |        |            |              |    |                                                                                                                                           |
|----------------------|--------|------------|--------------|----|-------------------------------------------------------------------------------------------------------------------------------------------|
| I529SfsX15           | DI-DII | FrameShift | DS           | NR | (Ishii et al., 2017)                                                                                                                      |
| I529NfsX11           | DI-DII | FrameShift | DS           | NR | (Cetica et al., 2017)                                                                                                                     |
| R530KfsX10           | DI-DII | FrameShift | DS           | NR | (Haginoya et al., 2018)                                                                                                                   |
| G533VfsX11           | DI-DII | FrameShift | DS           | NR | (Ishii et al., 2017)                                                                                                                      |
| R542X (De novo)      | DI-DII | Nonsense   | SME<br>DS    | NR | (Marini et al., 2007; Depienne et al., 2008; Riva et al., 2009; Sun et al., 2010; Zuberi et al., 2011)                                    |
| R542Q(Paternal)      | DI-DII | Missense   | GEFS+<br>SME | NR | (Escayg et al., 2001; Weiss et al., 2003; Combi et al., 2009; Orrico et al., 2009; Wang et al., 2012; Lee et al., 2014; Lal et al., 2016) |
| L543X                | DI-DII | Nonsense   | DS           | NR | (Cetica et al., 2017)                                                                                                                     |
| T544HfsX14 (De novo) | DI-DII | FrameShift | SMEB         | NR | (Lim et al., 2011)                                                                                                                        |
| Y545LfsX12           | DI-DII | FrameShift | DS           | NR | (Ishii et al., 2017)                                                                                                                      |

|                        |        |            |      |                                                                     |                                              |
|------------------------|--------|------------|------|---------------------------------------------------------------------|----------------------------------------------|
| E546X                  | DI-DII | Nonsense   | DS   | NR                                                                  | (Liu et al., 2018)                           |
| Y549GfsX1<br>0         | DI-DII | FrameShift | DS   | NR                                                                  | (Zuberi et al., 2011)                        |
| K547EfsX2<br>3         | DI-DII | FrameShift | DS   | NR                                                                  | (Harkin et al., 2007; Depienne et al., 2008) |
| R548EsX23<br>(De novo) | DI-DII | FrameShift | SMEB | NR                                                                  | (Ohmori et al., 2002)                        |
| Q554fsX17              | DI-DII | FrameShift | DS   | NR                                                                  | (Sun et al., 2010)                           |
| E554R                  | DI-DII | Missense   | SME  | NR                                                                  | (Xu et al., 2014)                            |
| Q554H (De<br>novo)     | DI-DII | Missense   | DS   | Genelized tonic-clonic<br>seizure, atonic and<br>myoclonic seizures | (Skjei et al., 2015)                         |
| S555FfsX6<br>(De novo) | DI-DII | FrameShift | DS   | NR                                                                  | (Zuberi et al., 2011)                        |
| L556CfsX2<br>(De novo) | DI-DII | FrameShift | DS   | NR                                                                  | (Sun et al., 2008a)                          |

|                          |        |            |                    |                                             |                                                                                                                                                 |
|--------------------------|--------|------------|--------------------|---------------------------------------------|-------------------------------------------------------------------------------------------------------------------------------------------------|
| R560VfsX6<br>3           | DI-DII | FrameShift | Epilepsy           | Generalized epilepsy<br>Developmental delay | (Hesse et al., 2018)                                                                                                                            |
| R560PfsX8<br>(De novo)   | DI-DII | FrameShift | DS                 | NR                                          | (Zuberi et al., 2011)                                                                                                                           |
| L563YfsX6<br>0 (De novo) | DI-DII | FrameShift | DS                 | NR                                          | (Harkin et al., 2007)                                                                                                                           |
| L563Q                    | DI-DII | Missense   | Episodic<br>ataxia | NR                                          | (Choi et al., 2017)                                                                                                                             |
| P566S                    | DI-DII | Missense   | DS                 | NR                                          | (Usluer et al., 2016)                                                                                                                           |
| R568X (De<br>novo)       | DI-DII | Nonsense   | DS                 | NR                                          | (Ohmori et al., 2002; Marini et<br>al., 2007; Zuberi et al., 2011;<br>Okumura et al., 2012;<br>Villeneuve et al., 2014; Kothur<br>et al., 2018) |
| R568Q                    | DI-DII | Missense   | NR                 | Seizures                                    | (Butler et al., 2017a)                                                                                                                          |
| S570N                    | DI-DII | Missense   | EE                 | NR                                          | (Posey et al., 2017)                                                                                                                            |
| S570I<br>(Familial)      | DI-DII | Missense   | GEFS+              | NR                                          | (Cetica et al., 2017)                                                                                                                           |

## Supplementary Material

|                          |        |            |                                           |                                                        |                                                                                                                                                                                        |
|--------------------------|--------|------------|-------------------------------------------|--------------------------------------------------------|----------------------------------------------------------------------------------------------------------------------------------------------------------------------------------------|
| F575SfsX4<br>8 (De novo) | DI-DII | FrameShift | Cryptogenic<br>focal<br>epilepsy<br>PEFS+ | NR                                                     | (Harkin et al., 2007; Kim et al., 2014)                                                                                                                                                |
| R580X<br>(Familial)      | DI-DII | Nonsense   | DS                                        | NR                                                     | (Depienne et al., 2008; Arlier et al., 2010; Zuberi et al., 2011)                                                                                                                      |
| K582SfsX7                | DI-DII | FrameShift | Epilepsy                                  | NR                                                     | (Lindy et al., 2018)                                                                                                                                                                   |
| E602X                    | DI-DII | Nonsense   | DS                                        | NR                                                     | (Depienne et al., 2008)                                                                                                                                                                |
| R604H<br>(Paternal)      | DI-DII | Missense   | DS<br>Juvenile<br>myoclonic<br>epilepsy   | Generalized tonic-clonic seizures and Febrile Seizures | (Escayg et al., 2001; Harkin et al., 2007; Fendri-Kriaa et al., 2009; Wang et al., 2012; Lal et al., 2016)                                                                             |
| S607PfsX1<br>6           | DI-DII | FrameShift | Epilepsy                                  | NR                                                     | (Lindy et al., 2018)                                                                                                                                                                   |
| L608CfsX1<br>5           | DI-DII | FrameShift | SME<br>SMEB                               | NR                                                     | (Ohmori et al., 2002; Depienne et al., 2008)                                                                                                                                           |
| R612X (De<br>novo)       | DI-DII | Nonsense   | DS                                        | NR                                                     | (Sun et al., 2008a; Xu et al., 2014)                                                                                                                                                   |
| R613X (De<br>novo)       | DI-DII | Nonsense   | SME<br>DS                                 | NR                                                     | (Kearney et al., 2006; Depienne et al., 2008; Riva et al., 2009; Zuberi et al., 2011; Rodda et al., 2012; Wang et al., 2012; Moehring et al., 2013; Lee et al., 2014; Xu et al., 2014) |



|                       |        |            |                                                 |                                                                                                                   |                                                                                 |
|-----------------------|--------|------------|-------------------------------------------------|-------------------------------------------------------------------------------------------------------------------|---------------------------------------------------------------------------------|
| E616RfsX7             | DI-DII | FrameShift | DS                                              | NR                                                                                                                | (Cetica et al., 2017)                                                           |
| E616D                 | DI-DII | Missense   | Epilepsy                                        | NR                                                                                                                | (Parrini et al., 2017)                                                          |
| R617TfsX10 (Paternal) | DI-DII | FrameShift | DS                                              | NR                                                                                                                | (Yang et al., 2017)                                                             |
| R618C (Paternal)      | DI-DII | Missense   | PEFS+                                           | Generalized tonic-clonic seizures<br>Multifocal epilepsy (EEG)<br>Bilateral bursts of 3-4 Hz spike and wave (EEG) | (Brunklau et al., 2015)                                                         |
| R618AfsX5 (Paternal)  | DI-DII | FrameShift | Epilepsy                                        | NR                                                                                                                | (Lindy et al., 2018)                                                            |
| S620AfsX5 (De novo)   | DI-DII | FrameShift | SMEB                                            | NR                                                                                                                | (Marini et al., 2007)                                                           |
| T625PfsX47 (De novo)  | DI-DII | FrameShift | DS                                              | NR                                                                                                                | (Depienne et al., 2008)                                                         |
| S626G                 | DI-DII | Missense   | SME<br>SMEB<br>Cryptogenic generalized epilepsy | NR                                                                                                                | (Harkin et al., 2007; Depienne et al., 2008; Xu et al., 2014; Lee et al., 2017) |

|                      |        |            |       |                                   |                                       |
|----------------------|--------|------------|-------|-----------------------------------|---------------------------------------|
| R627K                | DI-DII | Missense   | GEFS+ | NR                                | (Cetica et al., 2017)                 |
| H642TfsX30 (De novo) | DI-DII | FrameShift | DS    | NR                                | (Ishii et al., 2017)                  |
| V645GfsX30 (De novo) | DI-DII | FrameShift | DS    | NR                                | (Yang et al., 2017; Liu et al., 2018) |
| N648Lys              | DI-DII | Missense   | EE    | NR                                | (Zhu et al., 2017)                    |
| P657L                | DI-DII | Missense   | DS    | NR                                | (Xu et al., 2015)                     |
| S662X (De novo)      | DI-DII | Nonsense   | PEFS+ | Generalized tonic-clonic seizures | (Yu et al., 2010)                     |
| D674G (De novo)      | DI-DII | Missense   | DS    | NR                                | (Harkin et al., 2007)                 |
| T685LfsX5            | DI-DII | FrameShift | SMEB  | NR                                | (Zuberi et al., 2011)                 |
| K691X                | DI-DII | Nonsense   | SME   | NR                                | (Xu et al., 2014)                     |

|                                 |        |            |               |                                                                                                                      |                                                                                                                                                                                                       |
|---------------------------------|--------|------------|---------------|----------------------------------------------------------------------------------------------------------------------|-------------------------------------------------------------------------------------------------------------------------------------------------------------------------------------------------------|
| S695TfsX7<br>(De novo)          | DI-DII | FrameShift | DS            | NR                                                                                                                   | (Depienne et al., 2008)                                                                                                                                                                               |
| S696SfsX8<br>(De novo)          | DI-DII | FrameShift | SME           | NR                                                                                                                   | (Lim et al., 2011)                                                                                                                                                                                    |
| H698Y                           | DI-DII | Missense   | SME           | NR                                                                                                                   | (Villeneuve et al., 2014)                                                                                                                                                                             |
| S700fsX4                        | DI-DII | FrameShift | SME           | NR                                                                                                                   | (Xu et al., 2014)                                                                                                                                                                                     |
| D702AfsX2<br>5 (De novo)        | DI-DII | FrameShift | EE            | NR                                                                                                                   | (de Kovel et al., 2016)                                                                                                                                                                               |
| P707NfsX9<br>(De novo)          | DI-DII | FrameShift | DS            | NR                                                                                                                   | (Kearney et al., 2006)                                                                                                                                                                                |
| Q711X                           | DI-DII | Nonsense   | SME           | Slow background,<br>generalized spikes<br>(EEG)<br><br>Generalized tonic-<br>clonic seizures                         | (Lee et al., 2014)                                                                                                                                                                                    |
| Q711HfsX4<br>(De novo)          | DI-DII | FrameShift | DS            | NR                                                                                                                   | (Depienne et al., 2008)                                                                                                                                                                               |
| R712X (De<br>novo;<br>Maternal) | DI-DII | Nonsense   | SME<br><br>DS | Focal epilepsy frontal<br>right, beta activity<br>(EEG)<br><br>Reduced current<br>density, low protein<br>expression | (Ohmori et al., 2002;<br>Sugawara et al., 2002, 2003;<br>Fukuma et al., 2004; Depienne<br>et al., 2008; Zuberi et al.,<br>2011; Okumura et al., 2012;<br>Wang et al., 2012; Moehring<br>et al., 2013) |

## Supplementary Material

|                       |        |            |     |                                                                                                    |                                       |
|-----------------------|--------|------------|-----|----------------------------------------------------------------------------------------------------|---------------------------------------|
| W737X                 | DI-DII | Nonsense   | DS  | NR                                                                                                 | (Ko et al., 2018)                     |
| W738X (De novo)       | DI-DII | Nonsense   | SME | Febrile seizures<br>Partial, generalized tonic-clonic, myoclonic<br>Severe intellectual disability | (Kwong et al., 2012; Xu et al., 2014) |
| W738L                 | DI-DII | Missense   | SME | NR                                                                                                 | (Xu et al., 2014)                     |
| W738CfsX <sub>9</sub> | DI-DII | FrameShift | SME | NR                                                                                                 | (Hattori et al., 2008)                |
| I747TfsX9             | DI-DII | FrameShift | DS  | NR                                                                                                 | (Ishii et al., 2017)                  |
| W748X                 | DI-DII | Nonsense   | DS  | NR                                                                                                 | (Wang et al., 2012)                   |
| Y753X                 | DI-DII | Nonsense   | DS  | NR                                                                                                 | (Do et al., 2017)                     |
| W754X                 | DI-DII | Nonsense   | DS  | NR                                                                                                 | (Ishii et al., 2017)                  |
| W754L                 | DI-DII | Missense   | DS  | NR                                                                                                 | (Xu et al., 2015)                     |

|                          |          |                      |           |    |                                     |
|--------------------------|----------|----------------------|-----------|----|-------------------------------------|
| H759fsX14<br>(De novo)   | DI-DII   | FrameShift           | SME       | NR | (Lin et al., 2013)                  |
| N762D<br>(Paternal)      | DI-DII   | Missense             | DS        | NR | (Zuberi et al., 2011)               |
| P768L                    | DIIS1    | Missense             | SME<br>DS | NR | (Sun et al., 2010; Xu et al., 2014) |
| P768fsX5                 | DIIS1    | FrameShift           | DS        | NR | (Sun et al., 2010)                  |
| F769Y                    | DIIS1    | Missense             | GEFS+     | NR | (Cetica et al., 2017)               |
| A773TfsX3<br>1 (De novo) | DIIS1    | FrameShift           | EE        | NR | (Wei et al., 2018)                  |
| I774HfsX25               | DIIS1    | FrameShift           | DS        | NR | (Xu et al., 2015)                   |
| L780delins<br>FI         | DIIS1    | In-frame<br>Deletion | Epilepsy  | NR | (Lindy et al., 2018)                |
| L783P (De<br>novo)       | DIIS1    | Missense             | DS        | NR | (Harkin et al., 2007)               |
| M785V                    | DIIS1-S2 | Missense             | DS        | NR | (Xu et al., 2015)                   |

## Supplementary Material

|                      |          |            |                                   |                                                                                          |                                                                                      |
|----------------------|----------|------------|-----------------------------------|------------------------------------------------------------------------------------------|--------------------------------------------------------------------------------------|
| M785T (De novo)      | DIIS1-S2 | Missense   | DS                                | NR                                                                                       | (Zuberi et al., 2011; Lindy et al., 2018)                                            |
| A786T                | DIIS1-S2 | Missense   | DS                                | NR                                                                                       | (Cetica et al., 2017)                                                                |
| E788K                | DIIS1-S2 | Missense   | SME                               | NR                                                                                       | (Hattori et al., 2008)                                                               |
| Y790C (Paternal)     | DIIS1-S2 | Missense   | GEFS+                             | Reduced current density (91%) associated with reduction of cell surface expression (91%) | (Annesi et al., 2003; Orrico et al., 2009; Bechi et al., 2015; Bennett et al., 2017) |
| Y790F                | DIIS1-S2 | Missense   | GEFS+<br>Panayiotopoulos Syndrome | NR                                                                                       | (Grosso et al., 2007; Cetica et al., 2017)                                           |
| Y790X (De novo)      | DIIS1-S2 | Nonsense   | DS                                | NR                                                                                       | (Depienne et al., 2008)                                                              |
| Q791X (De novo)      | DIIS1-S2 | Nonsense   | DS                                | NR                                                                                       | (Esterhuizen et al., 2018)                                                           |
| N804K                | DIIS2    | Missense   | DS                                | NR                                                                                       | (Cetica et al., 2017)                                                                |
| F807LfsX11 (De novo) | DIIS2    | FrameShift | DS                                | NR                                                                                       | (Zuberi et al., 2011)                                                                |

|                     |       |            |        |                                                                                                                                      |                                         |
|---------------------|-------|------------|--------|--------------------------------------------------------------------------------------------------------------------------------------|-----------------------------------------|
| T808S (De novo)     | DIIS2 | Missense   | ICEGTC | Rare sharp waves in left temporal (EEG)<br>Moderate mental decline<br>Increase current density<br>Delayed recovery from inactivation | (Fujiwara, 2003; Rhodes et al., 2005)   |
| T812I               | DIIS2 | Missense   | SMEB   | NR                                                                                                                                   | (Zuberi et al., 2011)                   |
| T812R (De novo)     | DIIS2 | Missense   | DS     | NR                                                                                                                                   | (Claes et al., 2009; Riva et al., 2009) |
| Y825fs              | DIIS2 | FrameShift | DS     | NR                                                                                                                                   | (Martin et al., 2010)                   |
| Y827D               | DIIS2 | Missense   | DS     | NR                                                                                                                                   | (Xu et al., 2015)                       |
| E830X (De novo)     | DIIS2 | Nonsense   | DS     | NR                                                                                                                                   | (Zhang et al., 2015)                    |
| W832X               | DIIS3 | Nonsense   | DS     | NR                                                                                                                                   | (Depienne et al., 2008)                 |
| F835WfsX7 (De novo) | DIIS3 | FrameShift | DS     | NR                                                                                                                                   | (Depienne et al., 2008)                 |
| D836X (De novo)     | DIIS3 | Nonsense   | DS     | NR                                                                                                                                   | (Zuberi et al., 2011)                   |

|                 |       |            |     |                                                                                          |                         |
|-----------------|-------|------------|-----|------------------------------------------------------------------------------------------|-------------------------|
| V841A           | DIIS3 | Missense   | DS  | NR                                                                                       | (Ko et al., 2018)       |
| L842R           | DIIS3 | Missense   | DS  | NR                                                                                       | (Zuberi et al., 2011)   |
| F843R           | DIIS3 | Missense   | DS  | NR                                                                                       | (Depienne et al., 2008) |
| S843X (De novo) | DIIS3 | Nonsense   | DS  | EEG reveals focal spike activity, diffuse polyspike waves accompanied by myoclonic jerks | (Buoni et al., 2006)    |
| S843R (De novo) | DIIS3 | Missense   | DS  | NR                                                                                       | (Depienne et al., 2008) |
| L844X           | DIIS3 | Nonsense   | SME | NR                                                                                       | (Dhamija et al., 2014)  |
| E853K (De novo) | DIIS3 | Missense   | DS  | NR                                                                                       | (Riva et al., 2009)     |
| E846G           | DIIS3 | Missense   | SME | NR                                                                                       | (Xu et al., 2014)       |
| R846DfsX3<br>1  | DIIS3 | FrameShift | DS  | NR                                                                                       | (Ishii et al., 2017)    |



|                                 |          |                      |             |                                                             |                                                                         |
|---------------------------------|----------|----------------------|-------------|-------------------------------------------------------------|-------------------------------------------------------------------------|
| G848DfsX2<br>9                  | DIIS3    | FrameShift           | DS          | NR                                                          | (Depienne et al., 2008)                                                 |
| L849TfsX6<br>6                  | DIIS3    | FrameShift           | DS          | NR                                                          | (Depienne et al., 2008)                                                 |
| L849P                           | DIIS3    | Missense             | DS          | NR                                                          | (Cetica et al., 2017)                                                   |
| R851P (De<br>novo)              | DIIS3    | Missense             | DS          | NR                                                          | (Esterhuizen et al., 2018)                                              |
| E853K (De<br>novo)              | DIIS3-S4 | Missense             | DS          | NR                                                          | (Riva et al., 2009)                                                     |
| G854_L855<br>del (De<br>novo)   | DIIS3-S4 | In-frame<br>Deletion | SMEB        | NR                                                          | (Zuberi et al., 2011)                                                   |
| G854fsX23<br>(De novo)          | DIIS3-S4 | FrameShift           | DS          | NR                                                          | (Harkin et al., 2007)                                                   |
| V857FfsX2<br>0                  | DIIS3-S4 | FrameShift           | SME         | NR                                                          | (Depienne et al., 2008; Lindy<br>et al., 2018)                          |
| V857I                           | DIIS3-S4 | Missense             | Epilepsy    | NR                                                          | (Lindy et al., 2018)                                                    |
| R859C (De<br>novo,<br>Paternal) | DIIS4    | Missense             | GEFS+<br>DS | Shift steady state<br>activation to more<br>positive values | (Barela et al., 2006; Depienne<br>et al., 2008; Zuberi et al.,<br>2011) |

|                          |       |            |                      |                                                                                                       |                                                                                   |
|--------------------------|-------|------------|----------------------|-------------------------------------------------------------------------------------------------------|-----------------------------------------------------------------------------------|
|                          |       |            |                      |                                                                                                       |                                                                                   |
| R859H (Paternal)         | DIIS4 | Missense   | GEFS+                | Shift steady state activation and inactivation to more negative values<br>Increase Persistent current | (Volkers et al., 2011; Myers et al., 2017a; Lindy et al., 2018)                   |
| R862X (De novo, Familal) | DIIS4 | Nonsense   | GEFS+<br>SME<br>SMEB | NR                                                                                                    | (Orrico et al., 2009; Wang et al., 2012; Lee et al., 2014; Xu et al., 2014)       |
| R862G (De novo)          | DIIS4 | Missense   | MMPSI                | Multifocal epilepsy<br>Hemiclonic<br>Severe intellectual disability                                   | (Carranza Rojo et al., 2011; Barba et al., 2014)                                  |
| R862Q                    | DIIS4 | Missense   | DS                   | NR                                                                                                    | (Arlier et al., 2010; Zuberi et al., 2011)                                        |
| L863W (De novo)          | DIIS4 | Missense   | SME                  | NR                                                                                                    | (Xu et al., 2014)                                                                 |
| L864RfsX13 (De novo)     | DIIS4 | FrameShift | DS                   | NR                                                                                                    | (Zuberi et al., 2011)                                                             |
| R865G                    | DIIS4 | Missense   | DS                   | Shift steady state activation to more negative values<br>Increase Persistent current                  | (Volkers et al., 2011)                                                            |
| R865X (De novo)          | DIIS4 | Nonsense   | DS                   | NR                                                                                                    | (Ohmori et al., 2002; Depienne et al., 2008; Lim et al., 2011; Wang et al., 2012; |

|                     |       |                   |               |                                                                                                                                      |                                                                                                       |
|---------------------|-------|-------------------|---------------|--------------------------------------------------------------------------------------------------------------------------------------|-------------------------------------------------------------------------------------------------------|
|                     |       |                   |               |                                                                                                                                      | Xu et al., 2014; Kothur et al., 2018)                                                                 |
| K868del             | DIIS4 | In-frame Deletion | SME           | NR                                                                                                                                   | (Moehring et al., 2013)                                                                               |
| K868fsX7            | DIIS4 | FrameShift        | SME           | NR                                                                                                                                   | (Xu et al., 2014)                                                                                     |
| Ks868N (Maternal)   | DIIS4 | Missense          | GEFS+         | NR                                                                                                                                   | (Cetica et al., 2017)                                                                                 |
| A870LfsX5 (De novo) | DIIS4 | FrameShift        | DS            | NR                                                                                                                                   | (Marini et al., 2007)                                                                                 |
| S872Y               | DIIS4 | Missense          | SME           | NR                                                                                                                                   | (Xu et al., 2014)                                                                                     |
| W873X               | DIIS4 | Nonsense          | SMEB          | NR                                                                                                                                   | (Villeneuve et al., 2014)                                                                             |
| T875K (Paternal)    | DIIS4 | Missense          | SME<br>GEFS+  | Self-limited focal epilepsy of childhood<br>Atypical childhood epilepsy with centrotemporal spikes (EEG)<br>Panayiotopoulos syndrome | (Depienne et al., 2008; Kivity et al., 2017)                                                          |
| T875M               | DIIS4 | Missense          | PEFS+<br>SMEB | Enhance slow inactivation in the presence of beta1 subunity                                                                          | (Escayg et al., 2000; Alekov et al., 2001; Spanpanato et al., 2001a; George, 2004; Wang et al., 2012) |

|                         |          |            |             |                                                                                      |                                          |
|-------------------------|----------|------------|-------------|--------------------------------------------------------------------------------------|------------------------------------------|
|                         |          |            |             | Increase persistent current<br>Shift steady state activation to more positive values |                                          |
| L876I                   | DIIS4    | Missense   | DS          | NR                                                                                   | (Wang et al., 2012)                      |
| L879X                   | DIIS4-S5 | Nonsense   | DS          | NR                                                                                   | (Depienne et al., 2008)                  |
| L879P                   | DIIS4-S5 | Missense   | DS<br>GEFS+ | NR                                                                                   | (Møller et al., 2016)                    |
| I880KfsX14              | DIIS4-S5 | FrameShift | SME         | NR                                                                                   | (Depienne et al., 2008)                  |
| I882F (De novo)         | DIIS4-S5 | Missense   | DS          | NR                                                                                   | (Ishii et al., 2017)                     |
| S886F                   | DIIS4-S5 | Missense   | DS          | NR                                                                                   | (Cetica et al., 2017)                    |
| Ala889LeufsX5 (De novo) | DIIS4-S5 | FrameShift | DS          | NR                                                                                   | (Zuberi et al., 2011)                    |
| Leu890Phe (De novo)     | DIIS4-S5 | Missense   | DS          | NR                                                                                   | (Zuberi et al., 2011; Tsai et al., 2018) |

|                           |       |                   |           |                                   |                                                                 |
|---------------------------|-------|-------------------|-----------|-----------------------------------|-----------------------------------------------------------------|
| Asn892Ilefs X2 (De novo)  | DIIS5 | FrameShift        | SME       | NR                                | (Singh et al., 2009)                                            |
| L893X (De novo)           | DIIS5 | Nonsense          | DS        | NR                                | (Riva et al., 2009)                                             |
| T894S                     | DIIS5 | Missense          | Epilepsy  | NR                                | (Lindy et al., 2018)                                            |
| V896L (De novo)           | DIIS5 | Missense          | DS        | NR                                | (Depienne et al., 2008)                                         |
| V896I                     | DIIS5 | Missense          | DS        | Generalized tonic-clonic seizures | (Rilstone et al., 2012; Wang et al., 2012)                      |
| V896F                     | DIIS5 | Missense          | SMEB      | NR                                | (Wang et al., 2012)                                             |
| V896_A898 del             | DIIS5 | In-frame deletion | Epilepsy  | NR                                | (Lindy et al., 2018)                                            |
| L897S                     | DIIS5 | Missense          | DS        | NR                                | (Xu et al., 2015)                                               |
| I899T (De novo, Familial) | DIIS5 | Missense          | GEFS+ LGS | NR                                | (Orrico et al., 2009; Allen et al., 2013; Bennett et al., 2017) |
| F902C                     | DIIS5 | Missense          | DS        | Not measurable current            | (Ohmori et al., 2002; Rhodes et al., 2004)                      |

## Supplementary Material

|                      |          |            |                |                             |                           |
|----------------------|----------|------------|----------------|-----------------------------|---------------------------|
| A905T                | DIIS5    | Missense   | DS             | NR                          | (Ishii et al., 2017)      |
| A905P (De novo)      | DIIS5    | Missense   | EE             | NR                          | (Hamdan et al., 2017)     |
| V906GfsX2<br>9       | DIIS5    | FrameShift | DS             | NR                          | (Ishii et al., 2017)      |
| V907F                | DIIS5    | Missense   | Focal epilepsy | Bitemporal slow waves (EEG) | (Hildebrand et al., 2016) |
| G908R                | DIIS5    | Missense   | Epilepsy       | NR                          | (Lindy et al., 2018)      |
| Q910K                | DIIS5    | Missense   | SME            | NR                          | (Xu et al., 2014)         |
| Q910L                | DIIS5    | Missense   | DS             | NR                          | (Ishii et al., 2017)      |
| S915AfsX20 (De novo) | DIIS5-S6 | FrameShift | SMEB           | NR                          | (Kearney et al., 2006)    |
| D918IfsX17           | DIIS5-S6 | FrameShift | DS             | NR                          | (Sun et al., 2010)        |

|                  |          |            |            |                                                                                                               |                                                                                      |
|------------------|----------|------------|------------|---------------------------------------------------------------------------------------------------------------|--------------------------------------------------------------------------------------|
| M923I (Paternal) | DIIS5-S6 | Missense   | DS         | NR                                                                                                            | (Liu et al., 2018)                                                                   |
| S925VfsX10       | DIIS5-S6 | FrameShift | Epilepsy   | NR                                                                                                            | (Lindy et al., 2018)                                                                 |
| C927F (De novo)  | DIIS5-S6 | Missense   | DS         | NR                                                                                                            | (Depienne et al., 2008)                                                              |
| Q928X            | DIIS5-S6 | Nonsense   | Epilepsy   | NR                                                                                                            | (Lindy et al., 2018)                                                                 |
| L929SfsX6        | DIIS5-S6 | FrameShift | DS         | Episode of status epilepticus followed by persistent lethargy afted 48 hours of acute febrile                 | (Tsuji et al., 2011)                                                                 |
| R931C (De novo)  | DIIS5-S6 | Missense   | DS<br>SMEB | NR                                                                                                            | (Ohmori et al., 2002; Depienne et al., 2008)                                         |
| R931H            | DIIS5-S6 | Missense   | SME<br>DS  | Fever vaccination<br>Generalized tonic-clonic<br>Dyscognitive<br>Developmental regression after seizure onset | (Catarino et al., 2011; Zuberi et al., 2011; Rilstone et al., 2012; Xu et al., 2014) |
| R931P            | DIIS5-S6 | Missense   | SME        | NR                                                                                                            | (Xu et al., 2014)                                                                    |
| W932R (De novo)  | DIIS5-S6 | Missense   | DS         | NR                                                                                                            | (Kothur et al., 2018)                                                                |

## Supplementary Material

|                  |          |          |           |                                                                                                                                                                                       |                                                                 |
|------------------|----------|----------|-----------|---------------------------------------------------------------------------------------------------------------------------------------------------------------------------------------|-----------------------------------------------------------------|
| W932C            | DIIS5-S6 | Missense | DS        | NR                                                                                                                                                                                    | (Zuberi et al., 2011)                                           |
| T932X (De novo)  | DIIS5-S6 | Nonsense | SME<br>DS | Generalized tonic-clonic seizures<br>Severe mental retardation                                                                                                                        | (Claes et al., 2003; Dhamija et al., 2014)                      |
| H933P            | DIIS5-S6 | Missense | DS        | NR                                                                                                                                                                                    | (Zuberi et al., 2011)                                           |
| M934R            | DIIS5-S6 | Missense | Epilepsy  | NR                                                                                                                                                                                    | (Lindy et al., 2018)                                            |
| M934I (De novo)  | DIIS5-S6 | Missense | DS        | Moderate psychomotor retardation                                                                                                                                                      | (Fukuma et al., 2004; Depienne et al., 2008; Wang et al., 2012) |
| N935H (Paternal) | DIIS5-S6 | Missense | PEFS+     | Generalized tonic-clonic<br>Hemiclonic seizure<br>Multiple generalized slow waves with some spike discharges while awake, bilateral frontal spikes and spike waves during sleep (EEG) | (Sun et al., 2008b)                                             |
| D936Y (De novo)  | DIIS5-S6 | Missense | Epilepsy  | NR                                                                                                                                                                                    | (Lindy et al., 2018)                                            |
| D936V (De novo)  | DIIS5-S6 | Missense | SME       | NR                                                                                                                                                                                    | (Lin et al., 2013)                                              |



|                      |          |            |             |                                                                                                                                             |                                           |
|----------------------|----------|------------|-------------|---------------------------------------------------------------------------------------------------------------------------------------------|-------------------------------------------|
| H939Y (De novo)      | DIIS5-S6 | Missense   | DS          | NR                                                                                                                                          | (Sun et al., 2010)                        |
| H939P                | DIIS5-S6 | Missense   | DS          | NR                                                                                                                                          | (Depienne et al., 2008)                   |
| H939Q (De novo)      | DIIS5-S6 | Missense   | DS          | Status epilepticus<br>Generalized tonic-clonic seizures<br>Complex partial seizures<br>Moderate mental retardation<br>No measurable current | (Claes et al., 2003; Ohmori et al., 2006) |
| S940F                | DIIS5-S6 | Missense   | DS          | NR                                                                                                                                          | (Wang et al., 2012)                       |
| L942V                | DIIS5-S6 | Missense   | DS<br>GEFS+ | NR                                                                                                                                          | (Møller et al., 2016)                     |
| L942P (De novo)      | DIIS5-S6 | Missense   | DS          | NR                                                                                                                                          | (Riva et al., 2009)                       |
| I943CfsX10 (De novo) | DIIS5-S6 | FrameShift | DS          | NR                                                                                                                                          | (Depienne et al., 2008)                   |
| I943D                | DIIS5-S6 | Missense   | DS          | NR                                                                                                                                          | (Depienne et al., 2008)                   |

## Supplementary Material

|                    |          |            |                                                   |                                                                                                                                                                                             |                                                                                                                                                                                |
|--------------------|----------|------------|---------------------------------------------------|---------------------------------------------------------------------------------------------------------------------------------------------------------------------------------------------|--------------------------------------------------------------------------------------------------------------------------------------------------------------------------------|
| V944A (De novo)    | DIIS5-S6 | Missense   | SMEB                                              | NR                                                                                                                                                                                          | (Fukuma et al., 2004; Wang et al., 2012)                                                                                                                                       |
| V944E (De novo)    | DIIS5-S6 | Missense   | DS                                                | NR                                                                                                                                                                                          | (Harkin et al., 2007; Rodda et al., 2012)                                                                                                                                      |
| F945L (De novo)    | DIIS5-S6 | Missense   | DS                                                | NR                                                                                                                                                                                          | (Harkin et al., 2007)                                                                                                                                                          |
| R946fsX8 (De novo) | DIIS5-S6 | FrameShift | DS                                                | NR                                                                                                                                                                                          | (Fujiwara, 2003)                                                                                                                                                               |
| R946C (De novo)    | DIIS5-S6 | Missense   | SME<br>DS<br>SMEB                                 | Non-functional Channel                                                                                                                                                                      | (Fukuma et al., 2004; Volkers et al., 2011; Zuberi et al., 2011; Wang et al., 2012; Lee et al., 2014; Xu et al., 2014)                                                         |
| R946S (De novo)    | DIIS5-S6 | Missense   | Severe idiopathic generalized epilepsy of infancy | Short generalized tonic-clonic seizures at night<br>Seizure onset left temporo-parietal (EEG)<br>Tonic seizure right arm<br>Seizure onset left frontal<br>Seizure onset right frontocentral | (Ebach et al., 2005; Tiefes et al., 2019)                                                                                                                                      |
| R946H (De novo)    | DIIS5-S6 | Missense   | PEFS+<br>SMEB<br>DS                               | Non-functional Channel                                                                                                                                                                      | (Fukuma et al., 2004; Harkin et al., 2007; Depienne et al., 2008; Liao et al., 2010; Verbeek et al., 2011, 2013; Volkers et al., 2011; Zuberi et al., 2011; Wang et al., 2012) |
| R946P              | DIIS5-S6 | Missense   | SME                                               | NR                                                                                                                                                                                          | (Xu et al., 2014)                                                                                                                                                              |

|                 |          |          |     |                                                            |                                                          |
|-----------------|----------|----------|-----|------------------------------------------------------------|----------------------------------------------------------|
| C949Y (De novo) | DIIS5-S6 | Missense | DS  | NR                                                         | (Depienne et al., 2008)                                  |
| C949S (De novo) | DIIS5-S6 | Missense | SME | NR                                                         | (Depienne et al., 2008)                                  |
| G950R (De novo) | DIIS5-S6 | Missense | DS  | NR                                                         | (Zuberi et al., 2011)                                    |
| G950E (De novo) | DIIS5-S6 | Missense | DS  | NR                                                         | (Harkin et al., 2007; Rodda et al., 2012)                |
| W952R (De novo) | DIIS5-S6 | Missense | DS  | NR                                                         | (Lim et al., 2011)                                       |
| W952G (De novo) | DIIS5-S6 | Missense | DS  | NR                                                         | (Sun et al., 2008a; Xu et al., 2014)                     |
| W952X           | DIIS5-S6 | Nonsense | DS  | Spikes in frontal-occipital; High voltage slow-waves (EEG) | (Fujiwara, 2003; Fukuma et al., 2004; Wang et al., 2012) |
| E954K           | DIIS5-S6 | Missense | DS  | NR                                                         | (Arlier et al., 2010; Zuberi et al., 2011)               |
| T955I           | DIIS5-S6 | Missense | DS  | NR                                                         | (Ishii et al., 2017)                                     |
| M956K (De novo) | DIIS5-S6 | Missense | DS  | NR                                                         | (Zuberi et al., 2011)                                    |

## Supplementary Material

|                          |          |            |            |                                                                                                                                |                                                |
|--------------------------|----------|------------|------------|--------------------------------------------------------------------------------------------------------------------------------|------------------------------------------------|
| M956T<br>(Familial)      | DIIS5-S6 | Missense   | FS+        | Reduced current density<br>(80%) associated with<br>reduction of cell surface<br>expression (74%)                              | (Bechi et al., 2015; Pippucci et<br>al., 2015) |
| W957R                    | DIIS5-S6 | Missense   | DS         | NR                                                                                                                             | (Cantarín Extremera et al.,<br>2011)           |
| W957L (De<br>novo)       | DIIS5-S6 | Missense   | DS         | NR                                                                                                                             | (Marini et al., 2007; Zuberi et<br>al., 2011)  |
| D958TfsX1<br>6           | DIIS5-S6 | FrameShift | DS         | NR                                                                                                                             | (Zuberi et al., 2011)                          |
| D958RfsX1<br>3           | DIIS5-S6 | FrameShift | DS         | NR                                                                                                                             | (Xu et al., 2015)                              |
| C959VfsX1<br>5 (De novo) | DIIS5-S6 | FrameShift | DS         | NR                                                                                                                             | (Sugawara et al., 2002)                        |
| C959R (De<br>novo)       | DIIS5-S6 | Missense   | DS         | Post trauma epilepsy<br>lateralized tonic-clonic<br>seizures<br><br>Severe mental<br>retardation<br><br>Non-functional Channel | (Claes et al., 2003; Ohmori et<br>al., 2006)   |
| C959Y (De<br>novo)       | DIIS5-S6 | Missense   | LGS<br>SME | NR                                                                                                                             | (Allen et al., 2013; Xu et al.,<br>2014)       |
| C959S (De<br>novo)       | DIIS5-S6 | Missense   | DS         | NR                                                                                                                             | (Cetica et al., 2017; Wei et al.,<br>2018)     |

|                     |          |            |          |                                                                                     |                         |
|---------------------|----------|------------|----------|-------------------------------------------------------------------------------------|-------------------------|
| C959X               | DIIS5-S6 | Nonsense   | Epilepsy | NR                                                                                  | (Lindy et al., 2018)    |
| M960V               | DIIS5-S6 | Missense   | DS       | Spike-waves complex,<br>rare focal spikes (EEG)<br><br>Severe mental<br>retardation | (Fujiwara, 2003)        |
| M960T               | DIIS5-S6 | Missense   | GEFS+    | NR                                                                                  | (Zuberi et al., 2011)   |
| M960R               | DIIS5-S6 | Missense   | DS       | NR                                                                                  | (Xu et al., 2015)       |
| Q965X               | DIIS5-S6 | Nonsense   | DS       | NR                                                                                  | (Harkin et al., 2007)   |
| Q965fsX             | DIIS5-S6 | FrameShift | DS       | Multifocal discharges<br>(EEG)                                                      | (Liu et al., 2018)      |
| M967I<br>(Maternal) | DIIS6    | Missense   | GEFS+    | NR                                                                                  | (Selmer et al., 2008)   |
| C968G (De<br>novo)  | DIIS6    | Missense   | EE       | NR                                                                                  | (de Kovel et al., 2016) |
| C968F               | DIIS6    | Missense   | DS       | NR                                                                                  | (Xu et al., 2015)       |

## Supplementary Material

|                          |       |            |                                        |                                                                                                       |                                            |
|--------------------------|-------|------------|----------------------------------------|-------------------------------------------------------------------------------------------------------|--------------------------------------------|
| C968X (De novo)          | DIIS6 | Nonsense   | SME<br>DS                              | NR                                                                                                    | (Depienne et al., 2008; Wang et al., 2012) |
| L969P (De novo)          | DIIS6 | Missense   | DS                                     | NR                                                                                                    | (Do et al., 2017)                          |
| T970DfsX9                | DIIS6 | FrameShift | DS                                     | NR                                                                                                    | (Zuberi et al., 2011)                      |
| T970fsX97<br>2 (De novo) | DIIS6 | FrameShift | DS                                     | NR                                                                                                    | (Riva et al., 2009)                        |
| V971I                    | DIIS6 | Missense   | DS                                     | NR                                                                                                    | (Cetica et al., 2017)                      |
| V971L (De novo)          | DIIS6 | Missense   | DS                                     | Generalized and<br>unilateral tonic-clonic<br>seizures<br><br>Myoclonic seizures<br><br>Apneic spells | (Poryo et al., 2017)                       |
| M973V<br>(Paternal)      | DIIS6 | Missense   | Cryptogenic<br>generalized<br>epilepsy | NR                                                                                                    | (Harkin et al., 2007)                      |
| M973K (De novo)          | DIIS6 | Missense   | DS                                     | NR                                                                                                    | (Depienne et al., 2008)                    |
| V975L                    | DIIS6 | Missense   | NR                                     | Seizures and<br>developmental delay                                                                   | (Butler et al., 2017b)                     |

|                           |       |            |                                                         |                                                                        |                                                                                         |
|---------------------------|-------|------------|---------------------------------------------------------|------------------------------------------------------------------------|-----------------------------------------------------------------------------------------|
| M976RfsX1                 | DIIS6 | FrameShift | DS                                                      | Myoclonic, atonic, focal or motor seizures                             | (Skjei et al., 2015)                                                                    |
| M976I (De novo, Paternal) | DIIS6 | Missense   | GEFS+ DS                                                | Generalized tonic-clonic seizures<br>Focal Seizures<br>Hemiconvulsions | (Orrico et al., 2009; Zuberi et al., 2011; Petrelli et al., 2012; Bennett et al., 2017) |
| V977M                     | DIIS6 | Missense   | DS                                                      | NR                                                                     | (Xu et al., 2015)                                                                       |
| G979R                     | DIIS6 | Missense   | ICEGTC                                                  | Bilateral frontal sharp wave, Spike-slow (EEG)                         | (Fujiwara, 2003; Rhodes et al., 2005)                                                   |
| G979V                     | DIIS6 | Missense   | SMEB                                                    | NR                                                                     | (Zuberi et al., 2011)                                                                   |
| G979E                     | DIIS6 | Missense   | DS                                                      | NR                                                                     | (Xu et al., 2015)                                                                       |
| N980S                     | DIIS6 | Missense   | Epilepsy                                                | NR                                                                     | (Lindy et al., 2018)                                                                    |
| L981P                     | DIIS6 | Missense   | DS                                                      | NR                                                                     | (Ishii et al., 2017)                                                                    |
| V982L (De novo)           | DIIS6 | Missense   | SMEB<br>Acute encephalopathy with biphasic seizures and | Focal epilepsy<br>Spastic quadriplegia<br>Severe mental retardation    | (Singh et al., 2009; Saitoh et al., 2012, 2015b, 2015a)                                 |

|                     |       |            |                        |                                                                                                                                                                               |                                           |
|---------------------|-------|------------|------------------------|-------------------------------------------------------------------------------------------------------------------------------------------------------------------------------|-------------------------------------------|
|                     |       |            | late reduced diffusion |                                                                                                                                                                               |                                           |
| V983F               | DIIS6 | Missense   | DS                     | NR                                                                                                                                                                            | (Martin et al., 2010)                     |
| V983A (De novo)     | DIIS6 | Missense   | ICEGTC                 | Multifocal spikes, high voltage slow-waves (EEG)<br>Reduced current density<br>Shift steady state activation to ore positive values<br>Acelerrated recovery from inactivation | (Fujiwara, 2003; Rhodes et al., 2005)     |
| V983AfsX2 (De novo) | DIIS6 | FrameShift | DS                     | Enlarged extracerebral gap (MRI)                                                                                                                                              | (Wang et al., 2017)                       |
| N985I               | DIIS6 | Missense   | DS                     | Spike waves complex, spike wave in bilateral-frontal (EEG)                                                                                                                    | (Fujiwara, 2003; Sugawara et al., 2003)   |
| N985S               | DIIS6 | Missense   | DS                     | NR                                                                                                                                                                            | (Cetica et al., 2017)                     |
| L986F (De novo)     | DIIS6 | Missense   | DS                     | Gereneralized tonic-clonic seizures<br>Moderate mental retardation<br>Non-fuctional channel                                                                                   | (Claes et al., 2001; Lossin et al., 2003) |
| L988WfsX5           | DIIS6 | FrameShift | DS                     | NR                                                                                                                                                                            | (Ishii et al., 2017)                      |



|                     |          |            |          |                                                                                                      |                                                           |
|---------------------|----------|------------|----------|------------------------------------------------------------------------------------------------------|-----------------------------------------------------------|
| F987L (De novo)     | DIIS6    | Missense   | DS       | NR                                                                                                   | (Wang et al., 2012)                                       |
| A989V               | DIIS6    | Missense   | Epilepsy | NR                                                                                                   | (Lindy et al., 2018)                                      |
| L990F               | DIIS6    | Missense   | DS       | NR                                                                                                   | (Hattori et al., 2008)                                    |
| L991VfsX2 (De novo) | DIIS6    | FrameShift | DS       | Febrile, partial, generalized tonic-clonic<br>Myoclonic seizures<br>Moderate intellectual disability | (Kwong et al., 2012)                                      |
| S993R               | DII-DIII | Missense   | SMEB     | NR                                                                                                   | (Zuberi et al., 2011)                                     |
| S994ifsX2           | DII-DIII | FrameShift | DS       | NR                                                                                                   | (Xu et al., 2015)                                         |
| S994fsX16           | DII-DIII | FrameShift | SME      | NR                                                                                                   | (Xu et al., 2014)                                         |
| F995L               | DII-DIII | Missense   | DS       | NR                                                                                                   | (Xu et al., 2014; Ishii et al., 2017; Lindy et al., 2018) |
| D998G               | DII-DIII | Missense   | DS       | NR                                                                                                   | (Depienne et al., 2008)                                   |

|                        |          |                      |          |                                                                                                                                                                                         |                                           |
|------------------------|----------|----------------------|----------|-----------------------------------------------------------------------------------------------------------------------------------------------------------------------------------------|-------------------------------------------|
| D998E                  | DII-DIII | Missense             | Epilepsy | NR                                                                                                                                                                                      | (Lindy et al., 2018)                      |
| D998EfsX1<br>2         | DII-DIII | FrameShift           | Epilepsy | NR                                                                                                                                                                                      | (Lindy et al., 2018)                      |
| N999_Leu1<br>000del    | DII-DIII | In-frame<br>Deletion | DS       | NR                                                                                                                                                                                      | (Zuberi et al., 2011)                     |
| A1002fsX8<br>(De novo) | DII-DIII | FrameShift           | SMEB     | NR                                                                                                                                                                                      | (Ohmori et al., 2002)                     |
| I1003fsX               | DII-DIII | FrameShift           | DS       | NR                                                                                                                                                                                      | (Esterhuizen et al., 2018)                |
| D1006fsX4              | DII-DIII | FrameShift           | SME      | NR                                                                                                                                                                                      | (Xu et al., 2014)                         |
| E1008X<br>(De novo)    | DII-DIII | Nonsense             | SMEB     | NR                                                                                                                                                                                      | (Harkin et al., 2007; Rodda et al., 2012) |
| N1011I (De<br>novo)    | DII-DIII | Missense             | ICEGTC   | Rare sharp waves in<br>lateral-temporal (EEG)<br><br>Moderate mental<br>retardation<br><br>Reduced current density<br><br>Shift steady state<br>inactivation to more<br>negative values | (Fujiwara, 2003; Rhodes et al.,<br>2005)  |

|                              |          |                      |                         |    |                                           |
|------------------------------|----------|----------------------|-------------------------|----|-------------------------------------------|
| L1012delins<br>9 (De novo)   | DII-DIII | In-frame<br>Deletion | DS                      | NR | (Wu et al., 2015)                         |
| H1020TfsX<br>4               | DII-DIII | FrameShift           | Intractable<br>epilepsy | NR | (Wang et al., 2012)                       |
| E1021X<br>(De novo)          | DII-DIII | Nonsense             | DS                      | NR | (Nicita et al., 2010)                     |
| K1021fsX1<br>0               | DII-DIII | FrameShift           | DS                      | NR | (Xu et al., 2014)                         |
| Y1025X                       | DII-DIII | Nonsense             | Intractable<br>epilepsy | NR | (Wang et al., 2012)                       |
| K1027X<br>(De novo)          | DII-DIII | Nonsense             | DS                      | NR | (Ohmori et al., 2002)                     |
| E1032X                       | DII-DIII | Nonsense             | DS                      | NR | (Lin et al., 2010; Rocca et al.,<br>2010) |
| E1032DfsX<br>14 (De<br>novo) | DII-DIII | FrameShift           | DS                      | NR | (Harkin et al., 2007)                     |
| Q1035X                       | DII-DIII | Nonsense             | DS                      | NR | (Ishii et al., 2017)                      |
| Q1035HfsX<br>11              | DII-DIII | FrameShift           | DS                      | NR | (Ishii et al., 2017)                      |

|                       |          |            |                      |                                              |                                     |
|-----------------------|----------|------------|----------------------|----------------------------------------------|-------------------------------------|
| Q1036X                | DII-DIII | Nonsense   | SME                  | NR                                           | (Xu et al., 2014)                   |
| Q1042X                | DII-DIII | Nonsense   | Intractable epilepsy | NR                                           | (Wang et al., 2012)                 |
| D1046MfsX9 (De novo)  | DII-DIII | FrameShift | DS                   | Diffuse cerebral edema (Computed tomography) | (Myers et al., 2017b)               |
| E1047X (De novo)      | DII-DIII | Nonsense   | DS                   | NR                                           | (Zuberi et al., 2011)               |
| N1056D (De novo)      | DII-DIII | Missense   | DS                   | NR                                           | (Lim et al., 2011; Xu et al., 2014) |
| K1058TfsX21 (De novo) | DII-DIII | FrameShift | DS                   | NR                                           | (Riva et al., 2009)                 |
| D1059Y                | DII-DIII | Missense   | DS                   | NR                                           | (Zhou et al., 2018)                 |
| C1061X (De novo)      | DII-DIII | Nonsense   | DS                   | NR                                           | (Depienne et al., 2008)             |
| N1064IfsX14           | DII-DIII | FrameShift | DS                   | NR                                           | (Orrico et al., 2009)               |

|                             |          |            |                                         |                                                                                           |                         |
|-----------------------------|----------|------------|-----------------------------------------|-------------------------------------------------------------------------------------------|-------------------------|
| T1065SfsX<br>8 (De novo)    | DII-DIII | FrameShift | DS                                      | NR                                                                                        | (Nabbout et al., 2003)  |
| T1066A                      | DII-DIII | Missense   | DS                                      | NR                                                                                        | (Ishii et al., 2017)    |
| E1068K                      | DII-DIII | Missense   | DS                                      | NR                                                                                        | (Depienne et al., 2008) |
| D1078Mfs<br>X2 (De<br>novo) | DII-DIII | FrameShift | SMEB                                    | NR                                                                                        | (Harkin et al., 2007)   |
| G1081R                      | DII-DIII | Missense   | Juvenile<br>abscente<br>epilepsy        | NR                                                                                        | (Escayg et al., 2001)   |
| S1084C<br>(Paternal)        | DII-DIII | Missense   | Juvenile<br>myoclonic<br>epilepsy<br>DS | Paroxysmal generalised<br>polyspike-and-<br>wavecomplexeswithmy<br>oclonic seizures (EEG) | (Jingami et al., 2014)  |
| G1087E                      | DII-DIII | Missense   | GEFS+                                   | NR                                                                                        | (Cetica et al., 2017)   |
| S1090KfsX<br>4              | DII-DIII | FrameShift | Epilepsy                                | NR                                                                                        | (Lindy et al., 2018)    |
| K1094NfsX<br>13             | DII-DIII | FrameShift | DS                                      | NR                                                                                        | (Cetica et al., 2017)   |

## Supplementary Material

|                          |          |            |          |                                                                                                                                                             |                                                        |
|--------------------------|----------|------------|----------|-------------------------------------------------------------------------------------------------------------------------------------------------------------|--------------------------------------------------------|
| E1099X<br>(De novo)      | DII-DIII | Missense   | DS       | Isolated diffuse spikes-waves; prominent generalized polyspike-wave paroxysms and multifocal spikes involving the frontal or temporo-parietal regions (EEG) | (Depienne et al., 2008; Riva et al., 2009)             |
| S1100KfsX<br>8 (De novo) | DII-DIII | FrameShift | DS       | Generalized clonic seizures<br>Severe mental retardation                                                                                                    | (Claes et al., 2001)                                   |
| Y1102X<br>(De novo)      | DII-DIII | Nonsense   | DS       | NR                                                                                                                                                          | (Wang et al., 2012)                                    |
| M1103Vfs<br>X20          | DII-DIII | FrameShift | DS       | NR                                                                                                                                                          | (Wang et al., 2012)                                    |
| S1104X (De<br>novo)      | DII-DIII | Missense   | DS       | Febrile seizures                                                                                                                                            | (Depienne et al., 2008; Hernández Chávez et al., 2014) |
| L1111YfsX<br>12          | DII-DIII | FrameShift | DS       | NR                                                                                                                                                          | (Ishii et al., 2017)                                   |
| P1116QfsX<br>4 (De novo) | DII-DIII | FrameShift | DS       | NR                                                                                                                                                          | (Marini et al., 2007; Xu et al., 2014)                 |
| E1121X                   | DII-DIII | Nonsense   | Epilepsy | NR                                                                                                                                                          | (Lindy et al., 2018)                                   |
| F1124LfsX<br>4           | DII-DIII | FrameShift | DS       | NR                                                                                                                                                          | (Zhang et al., 2015)                                   |

|                              |          |            |          |    |                                           |
|------------------------------|----------|------------|----------|----|-------------------------------------------|
| E1125X<br>(De novo)          | DII-DIII | Missense   | DS       | NR | (Wang et al., 2012)                       |
| N1128KfsX<br>18 (De<br>novo) | DII-DIII | FrameShift | SMEB     | NR | (Lim et al., 2011)                        |
| E1130KfsX<br>16              | DII-DIII | FrameShift | DS       | NR | (Ishii et al., 2017)                      |
| D1137IfsX9                   | DII-DIII | FrameShift | Epilepsy | NR | (Lindy et al., 2018)                      |
| K1142X                       | DII-DIII | Nonsense   | DS       | NR | (Cetica et al., 2017)                     |
| L1145QfsX<br>2               | DII-DIII | FrameShift | DS       | NR | (Yang et al., 2017)                       |
| N1146KfsX<br>17 (De<br>novo) | DII-DIII | FrameShift | DS       | NR | (Wang et al., 2012)                       |
| E1147X<br>(De novo)          | DII-DIII | Nonsense   | SME      | NR | (Xu et al., 2014; Djémié et al.,<br>2016) |
| E1147CfsX<br>4               | DII-DIII | FrameShift | DS       | NR | (Møller et al., 2016)                     |
| S1150LfsX<br>5               | DII-DIII | FrameShift | DS       | NR | (Zuberi et al., 2011)                     |

## Supplementary Material

|                      |          |            |           |                                                                                                                            |                                             |
|----------------------|----------|------------|-----------|----------------------------------------------------------------------------------------------------------------------------|---------------------------------------------|
| S1151X (De novo)     | DII-DIII | Nonsense   | SME<br>DS | Neurologic sequelae with severe regressions of all skills<br><br>MRI reveals focal hyperintensity in the left frontal lobe | (Depienne et al., 2008; Gaily et al., 2013) |
| S1152X               | DII-DIII | Nonsense   | DS        | NR                                                                                                                         | (Xu et al., 2015)                           |
| E1153X (De novo)     | DII-DIII | Nonsense   | DS        | Focal epilepsy with frontal-lateral activity (EEG)                                                                         | (Hernández Chávez et al., 2014)             |
| S1155AfsX9 (De novo) | DII-DIII | FrameShift | DS        | NR                                                                                                                         | (Harkin et al., 2007)                       |
| S1155X (De novo)     | DII-DIII | Nonsense   | DS        | NR                                                                                                                         | (Sun et al., 2010)                          |
| I1159fsX5            | DII-DIII | FrameShift | DS        | NR                                                                                                                         | (Xu et al., 2014)                           |
| P1162KfsX5           | DII-DIII | FrameShift | DS        | NR                                                                                                                         | (Zuberi et al., 2011)                       |
| P1162LfsX2           | DII-DIII | FrameShift | SME       | NR                                                                                                                         | (Wang et al., 2012)                         |
| V1163X               | DII-DIII | Nonsense   | DS        | NR                                                                                                                         | (Sun et al., 2010)                          |



|                           |          |            |           |                                                                                                                                                  |                                                                                                                                        |
|---------------------------|----------|------------|-----------|--------------------------------------------------------------------------------------------------------------------------------------------------|----------------------------------------------------------------------------------------------------------------------------------------|
| Q1166X                    | DII-DIII | Nonsense   | DS        | NR                                                                                                                                               | (Ishii et al., 2017)                                                                                                                   |
| Q1166RfsX<br>3            | DII-DIII | FrameShift | DS        | NR                                                                                                                                               | (Ishii et al., 2017)                                                                                                                   |
| Q1172A                    | DII-DIII | Missense   | DS        | NR                                                                                                                                               | (Cho et al., 2018)                                                                                                                     |
| T1174S<br>(Maternal)      | DII-DIII | Missense   | FHM<br>FS | Shifty steady state activation to more positive values<br>Delayed fast inactivation<br>Enhanced persistent current                               | (Escayg et al., 2001; Gargus and Tournay, 2007; Yordanova et al., 2011; Rilstone et al., 2012; Cestèle et al., 2013; Lal et al., 2016) |
| L1175RfsX<br>8 (De novo)  | DII-DIII | FrameShift | DS        | NR                                                                                                                                               | (Fukuma et al., 2004; Wang et al., 2012)                                                                                               |
| E1176NfsX<br>32 (De novo) | DII-DIII | FrameShift | DS        | Severe intellectual disability<br>Intractable seizures despite multiple anti-epileptic drugs<br>High hypermetropia and a substantial astigmatism | (Willemsen et al., 2012)                                                                                                               |
| C1180SfsX<br>27           | DII-DIII | FrameShift | DS        | NR                                                                                                                                               | (Zuberi et al., 2011)                                                                                                                  |
| E1183KfsX<br>25 (De novo) | DII-DIII | FrameShift | DS        | NR                                                                                                                                               | (Yang et al., 2017)                                                                                                                    |

|                           |          |            |          |    |                         |
|---------------------------|----------|------------|----------|----|-------------------------|
| C1185VfsX<br>23           | DII-DIII | FrameShift | Epilepsy | NR | (Lindy et al., 2018)    |
| C1185X<br>(De novo)       | DII-DIII | Nonsense   | DS       | NR | (Zuberi et al., 2011)   |
| Q1187fsX2<br>9 (De novo)  | DII-DIII | FrameShift | DS       | NR | (Harkin et al., 2007)   |
| K1190SfsX<br>18           | DII-DIII | FrameShift | DS       | NR | (Cetica et al., 2017)   |
| C1192TfsX<br>29           | DII-DIII | FrameShift | DS       | NR | (Ishii et al., 2017)    |
| I1194SfsX1<br>4 (De novo) | DII-DIII | FrameShift | EE       | NR | (Veeramah et al., 2013) |
| I1194CfsX2<br>1           | DII-DIII | FrameShift | DS       | NR | (Cho et al., 2018)      |
| G1201X                    | DII-DIII | Nonsense   | SMEB     | NR | (Zuberi et al., 2011)   |
| Q1203X                    | DII-DIII | Nonsense   | Epilepsy | NR | (Lindy et al., 2018)    |

|                      |          |            |       |                                                                                                       |                                                                                          |
|----------------------|----------|------------|-------|-------------------------------------------------------------------------------------------------------|------------------------------------------------------------------------------------------|
| Gln1203His<br>fsX5   | DII-DIII | FrameShift | DS    | NR                                                                                                    | (McArdle et al., 2008)                                                                   |
| W1204R<br>(Paternal) | DII-DIII | Missense   | GEFS+ | Enhanced persistent current<br>Shift steady state activation and inactivation to more negative values | (Escayg et al., 2001; Lossin et al., 2003; Spampinato et al., 2003; Marini et al., 2007) |
| W1204S<br>(Maternal) | DII-DIII | Missense   | GEFS+ | NR                                                                                                    | (Zuberi et al., 2011)                                                                    |
| W1204X               | DII-DIII | Nonsense   | DS    | NR                                                                                                    | (Sugawara et al., 2002)                                                                  |
| W1205X               | DII-DIII | Nonsense   | SME   | NR                                                                                                    | (Xu et al., 2014)                                                                        |
| L1207P               | DII-DIII | Missense   | DS    | Hemiclonic seizures<br>Absence seizures                                                               | (Zucca et al., 2008)                                                                     |
| R1208K<br>(Maternal) | DII-DIII | FrameShift | SMEB  | NR                                                                                                    | (Zuberi et al., 2011)                                                                    |
| T1210K<br>(De novo)  | DII-DIII | Missense   | DS    | NR                                                                                                    | (Sun et al., 2010; Xu et al., 2014)                                                      |
| T1210M<br>(Paternal) | DII-DIII | Missense   | GEFS+ | NR                                                                                                    | (Cetica et al., 2017)                                                                    |

## Supplementary Material

|                                           |          |            |                  |                                                                                                                              |                                                                                                                      |
|-------------------------------------------|----------|------------|------------------|------------------------------------------------------------------------------------------------------------------------------|----------------------------------------------------------------------------------------------------------------------|
| C1211X                                    | DII-DIII | Nonsense   | DS               | NR                                                                                                                           | (Cho et al., 2018)                                                                                                   |
| R1213X<br>(De novo)                       | DII-DIII | Nonsense   | SME<br>DS<br>LGS | Rare spikes, multifocal<br>spikes and spike-wave<br>complex (EEG)<br>Severe mental delay                                     | (Fujiwara, 2003; Depienne et al., 2008; Zuberi et al., 2011; Wang et al., 2012; Allen et al., 2013; Xu et al., 2014) |
| I1214R (De novo)                          | DIIS1    | Missense   | DS               | Febrile Seizures, Partial<br>and generalized tonic-<br>clonic seizures<br>Absence seizure<br>Mild Intellectual<br>disability | (Kwong et al., 2012)                                                                                                 |
| V1215X                                    | DIIS1    | Nonsense   | DS               | NR                                                                                                                           | (Nabbout et al., 2003)                                                                                               |
| R1216K                                    | DIIS1    | Missense   | DS               | NR                                                                                                                           | (Ishii et al., 2017)                                                                                                 |
| E1216X<br>(De novo)                       | DIIS1    | Nonsense   | DS               | NR                                                                                                                           | (Yang et al., 2017)                                                                                                  |
| W1219IfsX<br>42 (De<br>novo) (De<br>novo) | DIIS1    | FrameShift | SME              | Neurologic sequel<br>Left-side hemiparesis                                                                                   | (Gaily et al., 2013)                                                                                                 |
| W1219X                                    | DIIS1    | Nonsense   | DS               | NR                                                                                                                           | (Depienne et al., 2008)                                                                                              |
| E1221K                                    | DIIS1    | Missense   | DS               | NR                                                                                                                           | (Zuberi et al., 2011)                                                                                                |

|                      |       |            |             |                                                                             |                        |
|----------------------|-------|------------|-------------|-----------------------------------------------------------------------------|------------------------|
| E1221Q               | DIIS1 | Missense   | DS          | NR                                                                          | (Xu et al., 2015)      |
| I1228S               | DIIS1 | Missense   | Epilepsy    | NR                                                                          | (Lindy et al., 2018)   |
| L1230F<br>(Maternal) | DIIS1 | Missense   | GEFS+<br>DS | NR                                                                          | (Zuberi et al., 2011)  |
| L1230P (De<br>novo)  | DIIS1 | Missense   | DS          | Focal spike-wave<br>complex (EEG)<br>Febrile seizures<br>Myoclonic seizures | (Liu et al., 2018)     |
| S1231T (De<br>novo)  | DIIS1 | Missense   | DS          | NR                                                                          | (Kearney et al., 2006) |
| S1231R (De<br>novo)  | DIIS1 | Missense   | DS          | polyspike-wave and<br>multiple spikes (EEG)<br>Moderate mental delay        | (Fujiwara, 2003)       |
| G1233R               | DIIS1 | Missense   | DS          | NR                                                                          | (Nabbout et al., 2003) |
| L1235fs<br>(De novo) | DIIS1 | FrameShift | DS          | NR                                                                          | (Riva et al., 2009)    |
| A1234VfsX<br>36      | DIIS1 | FrameShift | DS          | NR                                                                          | (Cetica et al., 2017)  |

|                              |          |            |           |    |                                          |
|------------------------------|----------|------------|-----------|----|------------------------------------------|
| A1236P                       | DIIS1    | Missense   | SME       | NR | (Xu et al., 2014)                        |
| E1238D                       | DIIS1    | Missense   | DS        | NR | (Harkin et al., 2007)                    |
| D1239Y<br>(De novo)          | DIIS1-S2 | Missense   | DS        | NR | (Depienne et al., 2008)                  |
| D1239G<br>(De novo)          | DIIS1-S2 | Missense   | DS        | NR | (Depienne et al., 2008)                  |
| I1240YfsX3<br>0              | DIIS1-S2 | FrameShift | SME       | NR | (Wang et al., 2012)                      |
| Y1241Rfsx<br>30 (De<br>novo) | DIIS1-S2 | FrameShift | DS        | NR | (Sun et al., 2010)                       |
| Y1241H                       | DIIS1-S2 | Missense   | DS        | NR | (Ishii et al., 2017)                     |
| D1243LfsX<br>28 (De<br>novo) | DIIS1-S2 | FrameShift | DS        | NR | (Marini et al., 2007; Wang et al., 2012) |
| Q1244X                       | DIIS1-S2 | Nonsense   | SME<br>DS | NR | (Xu et al., 2014; Wei et al., 2018)      |

|                          |          |            |              |                                                                                                      |                                                                                                                                                      |
|--------------------------|----------|------------|--------------|------------------------------------------------------------------------------------------------------|------------------------------------------------------------------------------------------------------------------------------------------------------|
| R1245X<br>(De novo)      | DIIS1-S2 | Nonsense   | SME<br>DS    | NR                                                                                                   | (Nabbout et al., 2003; Harkin et al., 2007; Depienne et al., 2008; Arlier et al., 2010; Zuberi et al., 2011; Moehring et al., 2013; Xu et al., 2014) |
| R1245Q<br>(De novo)      | DIIS1-S2 | Missense   | DS           | NR                                                                                                   | (Riva et al., 2009; Craig et al., 2012; Cetica et al., 2017)                                                                                         |
| T1247KfsX<br>4 (De novo) | DIIS1-S2 | FrameShift | DS           | NR                                                                                                   | (Depienne et al., 2008)                                                                                                                              |
| K1249N<br>(Familial)     | DIIS1-S2 | Missense   | GEFS+        | NR                                                                                                   | (Orrico et al., 2009)                                                                                                                                |
| T1250M<br>(Familial)     | DIIS1-S2 | Missense   | SME<br>GEFS+ | Generalized tonic-clonic seizures<br>Developmental delay after seizure onset<br>Behavioural problems | (Orrico et al., 2009; Catarino et al., 2011; Lal et al., 2016)                                                                                       |
| E1253X                   | DIIS2    | Nonsense   | SME          | NR                                                                                                   | (Xu et al., 2014)                                                                                                                                    |
| Y1254Mfs<br>X16          | DIIS2    | FrameShift | SME          | NR                                                                                                   | (Cetica et al., 2017)                                                                                                                                |
| Y1254C                   | DIIS2    | Missense   | Epilepsy     | NR                                                                                                   | (Wang et al., 2012)                                                                                                                                  |
| A1255D<br>(De novo)      | DIIS2    | Missense   | DS           | NR                                                                                                   | (Depienne et al., 2008)                                                                                                                              |

|                          |       |            |          |                                                                     |                         |
|--------------------------|-------|------------|----------|---------------------------------------------------------------------|-------------------------|
| V1257fsX1<br>3 (De novo) | DIIS2 | FrameShift | DS       | NR                                                                  | (Zucca et al., 2008)    |
| T1260HfsX<br>34          | DIIS2 | FrameShift | Epilepsy | NR                                                                  | (Lindy et al., 2018)    |
| F1259S                   | DIIS2 | Missense   | Epilepsy | NR                                                                  | (Lindy et al., 2018)    |
| T1260P (De<br>novo)      | DIIS2 | Missense   | DS       | NR                                                                  | (Sun et al., 2010)      |
| Y1261X<br>(De novo)      | DIIS2 | Nonsense   | DS       | NR                                                                  | (Depienne et al., 2008) |
| F1263L (De<br>novo)      | DIIS2 | Missense   | SMEB     | Rare spike-wave<br>complex and poly<br>spike-waves complex<br>(EEG) | (Fujiwara, 2003)        |
| L1265P (De<br>novo)      | DIIS2 | Missense   | DS       | NR                                                                  | (Ohmori et al., 2002)   |
| E1266A                   | DIIS2 | Missense   | DS       | NR                                                                  | (Zuberi et al., 2011)   |
| L1268GfsX<br>22          | DIIS2 | FrameShift | DS       | NR                                                                  | (Xu et al., 2015)       |



|                              |          |            |                |                                                                                                                   |                                                                  |
|------------------------------|----------|------------|----------------|-------------------------------------------------------------------------------------------------------------------|------------------------------------------------------------------|
| K1270T<br>(Maternal)         | DIIS2    | Missense   | PEFS+<br>GEFS+ | Multiple febrile seizures<br>Generalized tonic clonic<br>seizures<br>Partial becoming<br>generalized tonic-clonic | (Abou-Khalil et al., 2001; Sun et al., 2012; Allen et al., 2017) |
| K1270NfsX<br>21 (De<br>novo) | DIIS2    | FrameShift | DS             | NR                                                                                                                | (Zucca et al., 2008)                                             |
| W1271X                       | DIIS2    | Nonsense   | SMEB           | NR                                                                                                                | (Ohmori et al., 2002)                                            |
| A1273V                       | DIIS2    | Missense   | DS             | Shift steady state<br>activation and<br>inactivation to more<br>positive values                                   | (Xu et al., 2015; Peters et al.,<br>2016)                        |
| Y1274N<br>(Paternal)         | DIIS2    | Missense   | GEFS+          | NR                                                                                                                | (Ebrahimi et al., 2010;<br>Tonekaboni et al., 2013)              |
| Tyr1274Ser                   | DIIS2    | Missense   | DS             | NR                                                                                                                | (Xu et al., 2015)                                                |
| G1275A<br>(De novo)          | DIIS2    | Missense   | EE             | Prolonged febrile<br>Generalized tonic-<br>clonic seizures<br>Generalized spike-wave<br>complex (EEG)             | (Veeramah et al., 2013)                                          |
| Y1276X                       | DIIS2    | Nonsense   | SME            | NR                                                                                                                | (Xu et al., 2014)                                                |
| Q1277X                       | DIIS2-S3 | Nonsense   | SME            | NR                                                                                                                | (Hattori et al., 2008)                                           |

|                             |          |            |                                       |                               |                         |
|-----------------------------|----------|------------|---------------------------------------|-------------------------------|-------------------------|
| W1284R                      | DIIS3    | Missense   | Epilepsy                              | NR                            | (Lindy et al., 2018)    |
| W1284S<br>(De novo)         | DIIS3-S4 | Missense   | DS                                    | NR                            | (Depienne et al., 2008) |
| W1284X                      | DIIS3-S4 | Nonsense   | Development<br>delay with<br>seizures | NR                            | (Trump et al., 2016)    |
| W1284Cfs<br>X7 (De<br>novo) | DIIS3-S4 | FrameShift | DS                                    | Epileptic discharges<br>(EEG) | (Petrelli et al., 2012) |
| C1285LfsX<br>9              | DIIS3-S4 | FrameShift | DS                                    | NR                            | (Lindy et al., 2018)    |
| W1286X<br>(De novo)         | DIIS3-S4 | Nonsense   | DS                                    | NR                            | (Sun et al., 2010)      |
| L1287Pro<br>(De novo)       | DIIS3-S4 | Missense   | DS                                    | NR                            | (Sun et al., 2010)      |
| D1288N<br>(De novo)         | DIIS3-S4 | Missense   | DS                                    | NR                            | (Zuberi et al., 2011)   |
| D1288G                      | DIIS3-S4 | Missense   | Epilepsy                              | NR                            | (Lindy et al., 2018)    |

|                              |          |                      |            |                                                              |                                                                                                                    |
|------------------------------|----------|----------------------|------------|--------------------------------------------------------------|--------------------------------------------------------------------------------------------------------------------|
| F1289del<br>(De novo)        | DIIS3-S4 | In-frame<br>Deletion | SMEB<br>DS | Non-functional channel                                       | (Ohmori et al., 2002, 2006;<br>Margherita Mancardi et al.,<br>2006; Depienne et al., 2008)                         |
| L1290X                       | DIIS3-S4 | Nonsense             | DS         | NR                                                           | (Cetica et al., 2017)                                                                                              |
| D1293X                       | DIIS3-S4 | Nonsense             | DS         | NR                                                           | (Cetica et al., 2017)                                                                                              |
| D1293VfsX<br>7 (Familial)    | DIIS3-S4 | FrameShift           | DS         | NR                                                           | (Marini et al., 2007; Depienne<br>et al., 2008, 2010)                                                              |
| T1300R                       | DIIS3-S4 | Missense             | DS         | NR                                                           | (Xu et al., 2014)                                                                                                  |
| T1300KfsX<br>19              | DIIS3-S4 | FrameShift           | DS         | NR                                                           | (Ishii et al., 2017)                                                                                               |
| C1303MfsX<br>29 (De<br>novo) | DIIS3-S4 | FrameShift           | LGS        | NR                                                           | (Allen et al., 2013)                                                                                               |
| Y1306X                       | DIIS3-S4 | Nonsense             | Epilepsy   | NR                                                           | (Lindy et al., 2018)                                                                                               |
| E1308D(Fa<br>milial)         | DIIS3-S4 | Missense             | DS         | NR                                                           | (Orrico et al., 2009; Nicita et<br>al., 2010; Zuberi et al., 2011;<br>Lal et al., 2016; Maksemous et<br>al., 2016) |
| L1309F<br>(Paternal)         | DIIS4    | Missense             | GEFS+      | Generalized clonic<br>seizures of changing<br>lateralization | (Dimova et al., 2010; Allen et<br>al., 2017)                                                                       |

|                          |       |            |      |                                                                          |                                              |
|--------------------------|-------|------------|------|--------------------------------------------------------------------------|----------------------------------------------|
|                          |       |            |      | Myoclonic, atonic seizures<br>Generalized polyspike-wave discharges EEG) |                                              |
| L1309SfsX<br>10          | DIIS4 | FrameShift | DS   | NR                                                                       | (Ishii et al., 2017)                         |
| G1310EfsX<br>9           | DIIS4 | FrameShift | DS   | NR                                                                       | (Zuberi et al., 2011)                        |
| A1311PfsX<br>8 (De novo) | DIIS4 | FrameShift | DS   | NR                                                                       | (Zuberi et al., 2011)                        |
| K1313I                   | DIIS4 | Missense   | SME  | NR                                                                       | (Lee et al., 2014)                           |
| R1316W<br>(De novo)      | DIIS4 | Missense   | SMEB | NR                                                                       | (Lim et al., 2011)                           |
| R1316G                   | DIIS4 | Missense   | DS   | NR                                                                       | (Wang et al., 2012)                          |
| R1316S<br>(De novo)      | DIIS4 | Missense   | DS   | NR                                                                       | (Depienne et al., 2008; Kothur et al., 2018) |
| L1318R (De novo)         | DIIS4 | Missense   | DS   | Bifrontal sharp waves in right side (EEG)                                | (Mak et al., 2011)                           |

|                              |       |            |                         |    |                         |
|------------------------------|-------|------------|-------------------------|----|-------------------------|
| R1319X                       | DIIS4 | Nonsense   | DS                      | NR | (Cetica et al., 2017)   |
| R1319SfsX<br>12 (De<br>novo) | DIIS4 | FrameShift | DS                      | NR | (Depienne et al., 2008) |
| A1320V<br>(De novo)          | DIIS4 | mISSENSE   | DS                      | NR | (Zuberi et al., 2011)   |
| R1322II                      | DIIS4 | Missense   | SME                     | NR | (Lee et al., 2014)      |
| R1322SfsX<br>6               | DIIS4 | FrameShift | Epilepsy                | NR | (Lindy et al., 2018)    |
| P1323LfsX<br>2               | DIIS4 | FrameShift | DS                      | NR | (Zuberi et al., 2011)   |
| P1323R(De<br>novo)           | DIIS4 | Missense   | PEFS+                   | NR | (Lim et al., 2011)      |
| L1324fsX1                    | DIIS4 | FrameShift | SME                     | NR | (Xu et al., 2014)       |
| L1324fsX8<br>(De novo)       | DIIS4 | FrameShift | DS<br>SME               | NR | (Rocca et al., 2010)    |
| R1325T (De<br>novo)          | DIIS4 | Missense   | Intractable<br>epilepsy | NR | (Wang et al., 2012)     |

## Supplementary Material

|                            |       |            |                      |                                                                     |                                                                                       |
|----------------------------|-------|------------|----------------------|---------------------------------------------------------------------|---------------------------------------------------------------------------------------|
| A1326P (De novo)           | DIIS4 | Missense   | SME<br>DS            | NR                                                                  | (Wallace et al., 2003; Zuberi et al., 2011; Rodda et al., 2012)                       |
| A1326D(De novo)            | DIIS4 | Missense   | SMEB                 | NR                                                                  | (Singh et al., 2009)                                                                  |
| A1326V (De novo)           | DIIS4 | Missense   | Epilepsy-<br>aphasia | NR                                                                  | (Carvill et al., 2013)                                                                |
| S1328P                     | DIIS4 | Missense   | DS                   | NR                                                                  | (Depienne et al., 2008; Wang et al., 2012; Xiong et al., 2015)                        |
| R1329X (De novo; Maternal) | DIIS4 | Nonsense   | DS                   | Myoclonic seizures<br>Generalized tonic-clonic seizures             | (Depienne et al., 2008; Selmer et al., 2009; Zuberi et al., 2011; Lindy et al., 2018) |
| F1330LfsX<br>3             | DIIS4 | FrameShift | DS                   | Generalized tonic-clonic seizures<br>Status epilepticus and absence | (Lemke et al., 2012)                                                                  |
| G1332E                     | DIIS4 | Missense   | DS                   | NR                                                                  | (Ishii et al., 2017)                                                                  |
| M1333T                     | DIIS4 | Missense   | GEFS+                | NR                                                                  | (Cantarín Extremera et al., 2011)                                                     |
| R1334M                     | DIIS4 | Missense   | Epilepsy             | NR                                                                  | (Coll et al., 2017)                                                                   |

|                            |          |            |           |                                                                                                   |                                                            |
|----------------------------|----------|------------|-----------|---------------------------------------------------------------------------------------------------|------------------------------------------------------------|
| V1335M<br>(De novo)        | DIIS4-S5 | Missense   | DS        | Generalized tonic-clonic seizures<br>Absence seizures<br>Multifocal and diffuse spike-waves (EEG) | (Sun et al., 2008a; Zucca et al., 2008)                    |
| N1338fsX1<br>338 (De novo) | DIIS4-S5 | FrameShift | DS        | NR                                                                                                | (Lindy et al., 2018)                                       |
| A1339V<br>(De novo)        | DIIS4-S5 | Missense   | SME<br>DS | NR                                                                                                | (Okumura et al., 2012; Wang et al., 2012; Xu et al., 2014) |
| A1339D<br>(De novo)        | DIIS4-S5 | Missense   | Epilepsy  | NR                                                                                                | (Lindy et al., 2018)                                       |
| V1339G<br>(De novo)        | DIIS4-S5 | Missense   | DS        | NR                                                                                                | (Esterhuizen et al., 2018)                                 |
| L1340FfsX<br>38            | DIIS4-S5 | FrameShift | Epilepsy  | NR                                                                                                | (Lindy et al., 2018)                                       |
| L1341fsX8                  | DIIS4-S5 | FrameShift | SME       | Febrile generalized clonic seizure                                                                | (Sanchez-Carpintero et al., 2013)                          |
| L1341WfsX<br>37            | DIIS4-S5 | FrameShift | DS        | NR                                                                                                | (Depienne et al., 2008)                                    |
| A1343P                     | DIIS4-S5 | Missense   | Epilepsy  | NR                                                                                                | (Lindy et al., 2018)                                       |

|                       |          |            |                                                 |    |                         |
|-----------------------|----------|------------|-------------------------------------------------|----|-------------------------|
| I1344FfsX5            | DIIS4-S5 | FrameShift | Epilepsy                                        | NR | (Lindy et al., 2018)    |
| I1344M                | DIIS4-S5 | Missense   | DS                                              | NR | (Wang et al., 2012)     |
| P1345S (De novo)      | DIIS4-S5 | Missense   | EE                                              | NR | (Carvill et al., 2013)  |
| P1345L (De novo)      | DIIS4-S5 | Missense   | Malignant migrating partial seizures of infancy | NR | (Trump et al., 2016)    |
| I1347T (De novo)      | DIIS4-S5 | Missense   | EE                                              | NR | (de Kovel et al., 2016) |
| M1348I                | DIIS4-S5 | Missense   | DS                                              | NR | (Xu et al., 2015)       |
| V1350G (De novo)      | DIIS4-S5 | Missense   | DS                                              | NR | (Zuberi et al., 2011)   |
| V1350AfsX28 (De novo) | DIIS4-S5 | FrameShift | DS                                              | NR | (Wang et al., 2012)     |
| L1352P                | DIIS5    | Missense   | DS                                              | NR | (Xu et al., 2015)       |



|                         |       |            |                         |                                                     |                                                                   |
|-------------------------|-------|------------|-------------------------|-----------------------------------------------------|-------------------------------------------------------------------|
| V1353L<br>(Maternal)    | DIIS5 | Missense   | PEFS+<br>GEFS+          | Non-functional channel                              | (Wallace et al., 2001; Lossin et al., 2003; Bennett et al., 2017) |
| C1354R                  | DIIS5 | Missense   | Epilepsy                | NR                                                  | (Lindy et al., 2018)                                              |
| C1354Y                  | DIIS5 | Missense   | SME                     | Slow background,<br>generalized spikes<br>(EEG)     | (Lee et al., 2014)                                                |
| I1356TfsX4<br>(De novo) | DIIS5 | FrameShift | SMEB                    | NR                                                  | (Harkin et al., 2007)                                             |
| L1355P                  | DIIS5 | Missense   | SMEB                    | NR                                                  | (Wang et al., 2012)                                               |
| F1357L                  | DIIS5 | Missense   | Intractable<br>epilepsy | NR                                                  | (Wang et al., 2012)                                               |
| W1358R(D<br>e novo)     | DIIS5 | Missense   | DS                      | NR                                                  | (Zuberi et al., 2011)                                             |
| W1358X<br>(De novo)     | DIIS5 | Nonsense   | DS                      | NR                                                  | (Zuberi et al., 2011)                                             |
| W1358S<br>(De novo)     | DIIS5 | Missense   | DS                      | Hemiclonic seizures<br>Severe mental<br>retardation | (Zucca et al., 2008; Petrelli et al., 2012)                       |
| L1359I                  | DIIS5 | Missense   | DS                      | NR                                                  | (Cetica et al., 2017)                                             |

|                     |       |            |                         |                                                                                                                                                                                          |                           |
|---------------------|-------|------------|-------------------------|------------------------------------------------------------------------------------------------------------------------------------------------------------------------------------------|---------------------------|
| L1359Q<br>(De novo) | DIIS5 | Missense   | DS                      | NR                                                                                                                                                                                       | (Gokben et al., 2017)     |
| S1362R              | DIIS5 | Missense   | SME                     | NR                                                                                                                                                                                       | (Xu et al., 2014)         |
| I1363N              | DIIS5 | Missense   | SME                     | NR                                                                                                                                                                                       | (Xu et al., 2014)         |
| I1363fsX4           | DIIS5 | FrameShift | SMEB                    | NR                                                                                                                                                                                       | (Wang et al., 2012)       |
| M1364Lys            | DIIS5 | Missense   | SME                     | NR                                                                                                                                                                                       | (Villeneuve et al., 2014) |
| V1366I              | DIIS5 | Missense   | ICEGTC<br>GEEFS+<br>FS+ | 4-5Hz diffuse irregular spikes and wave complex at a drowsy state; Diffuse bilateral spike-waves only when valproate was reduced, otherwise no paroxysmal discharges were recorded (EEG) | (Osaka et al., 2007)      |
| V1366L              | DIIS5 | Missense   | Epilepsy                | NR                                                                                                                                                                                       | (Lindy et al., 2018)      |
| N1367K              | DIIS5 | Missense   | SME                     | NR                                                                                                                                                                                       | (Depienne et al., 2008)   |
| F1369LfsX<br>21     | DIIS5 | FrameShift | Epilepsy                | NR                                                                                                                                                                                       | (Lindy et al., 2018)      |

|                          |          |            |             |                                                                                                                                 |                                          |
|--------------------------|----------|------------|-------------|---------------------------------------------------------------------------------------------------------------------------------|------------------------------------------|
| A1370P                   | DIIS5    | Missense   | SMEB        | NR                                                                                                                              | (Lindy et al., 2018)                     |
| A1370V                   | DIIS5    | Missense   | DS<br>GEFS+ | NR                                                                                                                              | (Cetica et al., 2017)                    |
| G1371V<br>(De novo)      | DIIS5    | Missense   | SME<br>DS   | NR                                                                                                                              | (Dhamija et al., 2014; Liu et al., 2018) |
| K1372E                   | DIIS5    | Missense   | GEFS+       | Tonic-clonic and<br>myoclonic seizures<br>without fever<br><br>Slow spike waves from<br>the left fronto-central<br>region (EEG) | (Goldberg-Stern et al., 2014)            |
| F1373S                   | DIIS5    | Missense   | DS          | NR                                                                                                                              | (Cetica et al., 2017)                    |
| C1376R<br>(De novo)      | DIIS5    | Missense   | DS          | NR                                                                                                                              | (Wang et al., 2012)                      |
| C1376YfsX<br>2 (De novo) | DIIS5    | FrameShift | DS          | NR                                                                                                                              | (Lim et al., 2011; Kim et al., 2013)     |
| N1378H                   | DIIS5-S6 | Missense   | DS          | NR                                                                                                                              | (Zuberi et al., 2011)                    |
| N1378TfsX<br>13          | DIIS5-S6 | FrameShift | DS          | NR                                                                                                                              | (Zuberi et al., 2011; Cho et al., 2018)  |

## Supplementary Material

|                         |          |            |                   |                                                                                              |                                                                                                                                                |
|-------------------------|----------|------------|-------------------|----------------------------------------------------------------------------------------------|------------------------------------------------------------------------------------------------------------------------------------------------|
| V1379L                  | DIIS5-S6 | Missense   | PEFS+             | Febrile and generalized seizures<br>Focal seizures with secondary generalization             | (Mhanni et al., 2011)                                                                                                                          |
| G1382V<br>(De novo)     | DIIS5-S6 | Missense   | DS                | Diffuse spike-waves dominant in bilatereal frontal regions (EEG)                             | (Haginoya et al., 2018; Liu et al., 2018)                                                                                                      |
| D1383GfsX<br>4          | DIIS5-S6 | FrameShift | DS                | Complex partial seizures with generalization<br>Tonic seizures<br>Myoclonic astatic seizures | (Surovy et al., 2016)                                                                                                                          |
| F1385V                  | DIIS5-S6 | Missense   | DS                | NR                                                                                           | (Wang et al., 2012)                                                                                                                            |
| D1389AfsX<br>2          | DIIS5-S6 | FrameShift | Epilepsy          | NR                                                                                           | (Lindy et al., 2018)                                                                                                                           |
| V1390M<br>(De novo)     | DIIS5-S6 | Missense   | SME<br>SMEB<br>DS | Generalized spikes, focal spikes and polyspikes (EEG)                                        | (Ohmori et al., 2002; Harkin et al., 2007; Sun et al., 2008a; Rilstone et al., 2012; Verbeek et al., 2013; Lee et al., 2014; Cho et al., 2018) |
| N1391S                  | DIIS5-S6 | Missense   | Epilepsy          | NR                                                                                           | (Depienne et al., 2008)                                                                                                                        |
| N1392K<br>(De novo)     | DIIS5-S6 | Missense   | EEIE              | NR                                                                                           | (Arafat et al., 2017)                                                                                                                          |
| His1393Asp<br>(De novo) | DIIS5-S6 | Missense   | GEFS+             | FS+ with focal motor and absence                                                             | (Myers et al., 2017a)                                                                                                                          |

|                     |          |            |      |                                                                                                                   |                          |
|---------------------|----------|------------|------|-------------------------------------------------------------------------------------------------------------------|--------------------------|
| H1393P (De novo)    | DIIS5-S6 | Missense   | SMEB | Febrile generalized tonic-clonic seizures                                                                         | (Stefanaki et al., 2006) |
| T1394I (De novo)    | DIIS5-S6 | Missense   | DS   | NR                                                                                                                | (Zuberi et al., 2011)    |
| D1396Y (De novo)    | DIIS5-S6 | Missense   | DS   | Prolonged febrile seizures<br>Generalized tonic-clonic seizures<br>Atonic seizures                                | (Specchio et al., 2010)  |
| C1396G (De novo)    | DIIS5-S6 | Missense   | SMEB | NR                                                                                                                | (Harkin et al., 2007)    |
| C1396Y (De novo)    | DIIS5-S6 | Missense   | DS   | NR                                                                                                                | (Zuberi et al., 2011)    |
| C1396X              | DIIS5-S6 | Nonsense   | SME  | NR                                                                                                                | (Xu et al., 2014)        |
| L1397X              | DIIS5-S6 | Nonsense   | DS   | NR                                                                                                                | (Depienne et al., 2008)  |
| E1401KfsX3          | DIIS5-S6 | FrameShift | DS   | NR                                                                                                                | (Depienne et al., 2008)  |
| R1402fsX9 (De novo) | DIIS5-S6 | FrameShift | DS   | Generalized tonic-clonic seizures<br>Left-sided frontal epileptiform activity with secondary generalization (EEG) | (Yordanova et al., 2011) |

|                             |          |            |          |                                                                                                                            |                                                                             |
|-----------------------------|----------|------------|----------|----------------------------------------------------------------------------------------------------------------------------|-----------------------------------------------------------------------------|
| A1406T(Par<br>ternal)       | DIIS5-S6 | Missense   | DS       | NR                                                                                                                         | (Lim et al., 2011)                                                          |
| A1406GfsX<br>11             | DIIS5-S6 | FrameShift | Epilepsy | NR                                                                                                                         | (Lindy et al., 2018)                                                        |
| R1407X<br>(De novo)         | DIIS5-S6 | Nonsense   | DS       | Non-functional channel                                                                                                     | (Sugawara et al., 2002, 2003;<br>Harkin et al., 2007; Wang et<br>al., 2012) |
| W1408X<br>(De novo)         | DIIS5-S6 | Nonsense   | DS       | Generalized tonic-<br>clonic seizures<br>Frontal-dominant<br>spike-wave, poly spike-<br>waves (EEG)                        | (Fujiwara, 2003)                                                            |
| N1410Mfs<br>X2 (De<br>novo) | DIIS5-S6 | FrameShift | DS       | Febrile Seizures<br>Partial and generalised<br>tonic-clonic seizures<br>Absence seizure<br>Mild Intellectual<br>disability | (Kwong et al., 2012)                                                        |
| N1414D<br>(De novo)         | DIIS5-S6 | Missense   | GEFS+    | NR                                                                                                                         | (Zuberi et al., 2011)                                                       |
| N1414Y(De<br>novo)          | DIIS5-S6 | Missense   | DS       | NR                                                                                                                         | (Marini et al., 2007)                                                       |
| F1415I                      | DIIS5-S6 | Missense   | DS       | Shift steady state<br>inactivation to more<br>positive values                                                              | (Jiao et al., 2013)                                                         |
| F1415LfsX<br>4              | DIIS5-S6 | FrameShift | DS       | NR                                                                                                                         | (Ishii et al., 2017)                                                        |

|                        |          |            |          |                                                     |                                           |
|------------------------|----------|------------|----------|-----------------------------------------------------|-------------------------------------------|
| F1415X (De novo)       | DIIS5-S6 | Nonsense   | DS       | NR                                                  | (Depienne et al., 2008; Sun et al., 2010) |
| D1416H (De novo)       | DIIS5-S6 | Missense   | SME      | NR                                                  | (Mulley et al., 2013)                     |
| D1416G (De novo)       | DIIS5-S6 | Missense   | DS       | NR                                                  | (Depienne et al., 2008)                   |
| N1417S (De novo)       | DIIS5-S6 | Missense   | DS       | NR                                                  | (Zuberi et al., 2011)                     |
| V1418G                 | DIIS5-S6 | Missense   | DS       | NR                                                  | (Wang et al., 2012)                       |
| G1419DfsX 19 (De novo) | DIIS5-S6 | FrameShift | DS       | NR                                                  | (Depienne et al., 2008)                   |
| G1419X                 | DIIS5-S6 | Nonsense   | Epilepsy | NR                                                  | (Lindy et al., 2018)                      |
| G1421W                 | DIIS5-S6 | Missense   | DS       | NR                                                  | (Cho et al., 2018)                        |
| G1421AfsX 18           | DIIS5-S6 | FrameShift | DS       | Generalized tonic-clonic seizures<br>Hemiconvulsion | (de Lange et al., 2018)                   |
| Y1422C (De novo)       | DIIS5-S6 | Missense   | DS       | NR                                                  | (Riva et al., 2009)                       |

## Supplementary Material

|                    |          |                   |                                                    |                                                     |                                               |
|--------------------|----------|-------------------|----------------------------------------------------|-----------------------------------------------------|-----------------------------------------------|
| Y1422X             | DIIS5-S6 | Nonsense          | Intractable Epilepsy                               | NR                                                  | (Wang et al., 2012; Zhu et al., 2017)         |
| L1423F (Maternal)  | DIIS5-S6 | Missense          | DS                                                 | NR                                                  | (Zuberi et al., 2011)                         |
| L1426R (De novo)   | DIIS5-S6 | Missense          | DS                                                 | NR                                                  | (Riva et al., 2009)                           |
| Q1427cfsX16        | DIIS5-S6 | FrameShift        | SME                                                | NR                                                  | (Verbeek et al., 2013)                        |
| Q1427X (De novo)   | DIIS5-S6 | Nonsense          | SMEB                                               | NR                                                  | (Harkin et al., 2007)                         |
| Q1427P (De novo)   | DIIS5-S6 | Missense          | DS                                                 | NR                                                  | (Wang et al., 2012)                           |
| V1428A             | DIIS5-S6 | Missense          | GEFS+                                              | Febrile seizures<br>Right-temporal spike-wave (EEG) | (Sugawara et al., 2002; Perucca et al., 2017) |
| A1429del (De novo) | DIIS5-S6 | In-frame Deletion | DS                                                 | NR                                                  | (Zuberi et al., 2011)                         |
| A1429S (Paternal)  | DIIS5-S6 | Missense          | Autosomal dominant nocturnal frontal lobe epilepsy | NR                                                  | (Sone et al., 2012)                           |



|                          |          |            |                      |                                                            |                         |
|--------------------------|----------|------------|----------------------|------------------------------------------------------------|-------------------------|
| A1429T                   | DIIS5-S6 | Missense   | Epilepsy             | NR                                                         | (Lindy et al., 2018)    |
| A1429D                   | DIIS5-S6 | Missense   | Intractable epilepsy | NR                                                         | (Wang et al., 2012)     |
| A1429DfsX<br>15          | DIIS5-S6 | FrameShift | SMEB                 | NR                                                         | (Ohmori et al., 2002)   |
| A1429V<br>(De novo)      | DIIS5-S6 | Missense   | GEFS+                | MRI reveals a Pineal cyst<br>FS+ with focal motor seizures | (Myers et al., 2017a)   |
| F1431I                   | DIIS5-S6 | Missense   | DS                   | NR                                                         | (Depienne et al., 2008) |
| K1432R                   | DIIS5-S6 | Missense   | SME                  | Generalized spikes<br>(Ictal EEG)                          | (Lee et al., 2014)      |
| K1432KfsX<br>6 (De novo) | DIIS5-S6 | FrameShift | DS                   | NR                                                         | (Lim et al., 2011)      |
| G1433R<br>(De novo)      | DIIS5-S6 | Missense   | DS                   | NR                                                         | (Nicita et al., 2010)   |
| G1433V<br>(Paternal)     | DIIS5-S6 | Missense   | DS                   | NR                                                         | (Zuberi et al., 2011)   |

## Supplementary Material

|                     |          |            |           |                                                                                                       |                                                            |
|---------------------|----------|------------|-----------|-------------------------------------------------------------------------------------------------------|------------------------------------------------------------|
| G1433E<br>(De novo) | DIIS5-S6 | Missense   | DS<br>SME | Rare multifocal spikes<br>(EEG)<br>Hemiclonic seizures                                                | (Sun et al., 2008a; Verbeek et al., 2013; Xu et al., 2014) |
| W1434R<br>(De novo) | DIIS5-S6 | Missense   | DS<br>SME | Myoclonic seizures<br>Severe regression of all skills after seizures<br>Severe psychomotor disability | (Claes et al., 2003; Gaily et al., 2013)                   |
| W1434X<br>(De novo) | DIIS5-S6 | Nonsense   | DS        | Hemiclonic seizures                                                                                   | (Zucca et al., 2008) (Xu et al., 2015)                     |
| M1435K              | DIIS5-S6 | Missense   | Epilepsy  | NR                                                                                                    | (Lindy et al., 2018)                                       |
| M1435R              | DIIS5-S6 | Missense   | Epilepsy  | NR                                                                                                    | (Lindy et al., 2018)                                       |
| I1437M (De novo)    | DIIS5-S6 | Missense   | DS        | NR                                                                                                    | (Depienne et al., 2008)                                    |
| M1438 (De novo)     | DIIS5-S6 | Missense   | DS        | NR                                                                                                    | (Do et al., 2017)                                          |
| A1440QfsX<br>36     | DIIS5-S6 | FrameShift | Epilepsy  | NR                                                                                                    | (Lindy et al., 2018)                                       |
| A1440E<br>(De novo) | DIIS5-S6 | Missense   | SME       | NR                                                                                                    | (Gaily et al., 2013)                                       |

|                        |          |            |                             |                                                         |                                            |
|------------------------|----------|------------|-----------------------------|---------------------------------------------------------|--------------------------------------------|
| A1440G                 | DIIS5-S6 | Missense   | Juvenile myoclonic epilepsy | NR                                                      | (Lee et al., 2018)                         |
| A1440V                 | DIIS5-S6 | Missense   | Autism spectrum disorder    | Tonic-clonic and potentially myoclonic seizures         | (D’Gama et al., 2015)                      |
| A1441T                 | DIIS5-S6 | Missense   | SME                         | Focal spikes; generalized epileptiform discharges (EEG) | (Lee et al., 2014)                         |
| A1441P (De novo)       | DIIS5-S6 | Missense   | DS                          | NR                                                      | (Harkin et al., 2007; Mulley et al., 2013) |
| Q1450K (De novo)       | DIIS5-S6 | Missense   | DS                          | NR                                                      | (Zuberi et al., 2011)                      |
| Q1450P (De novo)       | DIIS5-S6 | Missense   | SME                         | Slow background (EEG)                                   | (Lin et al., 2013; Lee et al., 2014)       |
| Q1450R (De novo)       | DIIS5-S6 | Missense   | SMEB                        | NR                                                      | (Ohmori et al., 2002)                      |
| P1451S (De novo)       | DIIS5-S6 | Missense   | DS                          | NR                                                      | (Zuberi et al., 2011)                      |
| P1451L (De novo)       | DIIS5-S6 | Missense   | DS                          | NR                                                      | (Riva et al., 2009)                        |
| Y1451CfsX 22 (De novo) | DIIS5-S6 | FraneShift | DS                          | Multifocal discharges (EEG)                             | (Liu et al., 2018)                         |

|                              |          |            |            |                                                                                                                                 |                                          |
|------------------------------|----------|------------|------------|---------------------------------------------------------------------------------------------------------------------------------|------------------------------------------|
| Y1453C                       | DIIS5-S6 | Missense   | SMEB       | NR                                                                                                                              | (Wang et al., 2012)                      |
| Y1453X<br>(De novo)          | DIIS5-S6 | Nonsense   | DS         | NR                                                                                                                              | (Zuberi et al., 2011)                    |
| E1454K(De<br>novo)           | DIIS5-S6 | Missense   | DS         | NR                                                                                                                              | (Depienne et al., 2008)                  |
| Leu1461Ile<br>(Paternal)     | DIIS6    | Missense   | DS         | NR                                                                                                                              | (Nabbout et al., 2003)                   |
| Y1462H<br>(De novo)          | DIIS6    | Missense   | DS<br>SMEB | NR                                                                                                                              | (Zuberi et al., 2011; Wang et al., 2012) |
| Y1462LfsX<br>24 (De<br>novo) | DIIS6    | FrameShift | Epilepsy   | NR                                                                                                                              | (Staněk et al., 2018)                    |
| Y1462C                       | DIIS6    | Missense   | DS         | Absence and<br>hemiplegic seizures                                                                                              | (Zucca et al., 2008)                     |
| Y1462CfsX<br>22 (De<br>novo) | DIIS6    | FrameShift | DS         | NR                                                                                                                              | (Depienne et al., 2008)                  |
| F1463L (De<br>novo)          | DIIS6    | Missense   | DS         | Afebrile unilateral<br>clonic seizure<br>Generalized tonic-<br>clonic<br>Generalized and focal<br>epileptic discharges<br>(EEG) | (Reyes et al., 2011)                     |

|                    |       |                   |          |    |                                             |
|--------------------|-------|-------------------|----------|----|---------------------------------------------|
| F1463S (De novo)   | DIIS6 | Missense          | DS       | NR | (Nabbout et al., 2003) (Lindy et al., 2018) |
| I1467L             | DIIS6 | Missense          | DS       | NR | (Cetica et al., 2017)                       |
| G1470W (De novo)   | DIIS6 | Missense          | DS       | NR | (Marini et al., 2007)                       |
| S1471F             | DIIS6 | Missense          | DS       | NR | (Xu et al., 2015)                           |
| F1472S (De novo)   | DIIS6 | Missense          | SMEB     | NR | (Wang et al., 2012)                         |
| F1473del (De novo) | DIIS6 | In-frame Deletion | DS       | NR | (Depienne et al., 2008)                     |
| L1475S (De novo)   | DIIS6 | Missense          | DS       | NR | (Riva et al., 2009)                         |
| N1476K (De novo)   | DIIS6 | Missense          | SMEB     | NR | (Zuberi et al., 2011)                       |
| F1478C             | DIIS6 | Missense          | Epilepsy | NR | (Lindy et al., 2018)                        |
| G1480C             | DIIS6 | Missense          | Epilepsy | NR | (Lindy et al., 2018)                        |

|                           |          |                      |                                  |                                                                                                                                 |                                             |
|---------------------------|----------|----------------------|----------------------------------|---------------------------------------------------------------------------------------------------------------------------------|---------------------------------------------|
| G1480V<br>(De novo)       | DIIS6    | Missense             | Myoclonic<br>astatic<br>epilepsy | NR                                                                                                                              | (Harkin et al., 2007)                       |
| I1483del                  | DIIS6    | In-frame<br>Deletion | DS                               | NR                                                                                                                              | (Depienne et al., 2008)                     |
| D1484IfsX1<br>6 (De novo) | DIII-DIV | FrameShift           | Intractable<br>epilepsy          | NR                                                                                                                              | (Wang et al., 2012)                         |
| D1484G                    | DIII-DIV | Missense             | SMEB                             | NR                                                                                                                              | (Depienne et al., 2008)                     |
| N1485D<br>(De novo)       | DIII-DIV | Missense             | SME                              | NR                                                                                                                              | (Carvill et al., 2013)                      |
| N1485Y                    | DIII-DIV | Missense             | DS                               | NR                                                                                                                              | (Wang et al., 2012)                         |
| Q1489K<br>(Maternal)      | DIII-DIV | Missense             | FHM                              | Shift steady state<br>activation to more<br>negative values<br><br>Faster recovery from<br>inactivation at negative<br>voltages | (Dichgans et al., 2005)                     |
| K1491X                    | DIII-DIV | Nonsense             | DS                               | NR                                                                                                                              | (Zuberi et al., 2011; Wang et<br>al., 2012) |
| K1492EfsX<br>18           | DIII-DIV | FrameShift           | DS                               | NR                                                                                                                              | (Ishii et al., 2017)                        |

|                       |          |            |          |                                                                                                                                                    |                         |
|-----------------------|----------|------------|----------|----------------------------------------------------------------------------------------------------------------------------------------------------|-------------------------|
| K1492N(De novo)       | DIII-DIV | Missense   | DS       | NR                                                                                                                                                 | (Yang et al., 2017)     |
| G1495Dfs7             | DIII-DIV | FrameShift | DS       | Afebrile seizures                                                                                                                                  | (Haginoya et al., 2018) |
| G1495VfsX 6 (De novo) | DIII-DIV | FrameShift | DS       | NR                                                                                                                                                 | (Yang et al., 2017)     |
| Q1496KfsX 5 (De novo) | DIII-DIV | FrameShift | DS       | NR                                                                                                                                                 | (Riva et al., 2009)     |
| I1498N                | DIII-DIV | Missense   | Epilepsy | NR                                                                                                                                                 | (Lindy et al., 2018)    |
| I1498M (Parternal)    | DIII-DIV | Missense   | FHM      | Hemiplegic attacks were usually preceded by flashing lights or scotoma, speech problems and/or unilateral sensory symptoms                         | (Weller et al., 2014)   |
| F1499LfsX 2           | DIII-DIV | FrameShift | SME      | Generalized tonic-clonic convulsion;<br>Epileptic attack after photic stimulation with associated ictal discharges and temporal spikes waves (EEG) | (Lam et al., 2015)      |
| F1499LfsX 2           | DIII-DIV | FrameShift | DS       | NR                                                                                                                                                 | (Zuberi et al., 2011)   |
| T1501fs               | DIII-DIV | FrameShift | DS       | NR                                                                                                                                                 | (Do et al., 2017)       |

## Supplementary Material

|                             |          |                      |          |                                                                              |                                                            |
|-----------------------------|----------|----------------------|----------|------------------------------------------------------------------------------|------------------------------------------------------------|
| E1503K<br>(De novo)         | DIII-DIV | Missense             | SMEB     | NR                                                                           | (Shi et al., 2009; Zuberi et al., 2011; Wang et al., 2012) |
| E1503del<br>(De novo)       | DIII-DIV | In-frame<br>Deletion | SMEB     | NR                                                                           | (Wang et al., 2012)                                        |
| E1503G                      | DIII-DIV | Missense             | SME      | Background with theta activity and focal left-frontal focal discharges (EEG) | (Moehring et al., 2013)                                    |
| Q1504L                      | DIII-DIV | Missense             | Epilepsy | NR                                                                           | (Lindy et al., 2018)                                       |
| K1506NfsX<br>9 (De novo)    | DIII-DIV | FrameShift           | DS       | NR                                                                           | (Depienne et al., 2008)                                    |
| Y1507D                      | DIII-DIV | Missense             | DS       | NR                                                                           | (Ishii et al., 2017)                                       |
| Y1507X                      | DIII-DIV | Nonsense             | DS       | NR                                                                           | (Farwell et al., 2015; Helbig et al., 2016)                |
| Y1508X                      | DIII-DIV | Nonsense             | DS       | NR                                                                           | (Zuberi et al., 2011)                                      |
| D1509Mfs<br>X3 (De<br>novo) | DIII-DIV | FrameShift           | DS       | NR                                                                           | (Harkin et al., 2007)                                      |



|                           |          |            |                      |    |                                                                                                             |
|---------------------------|----------|------------|----------------------|----|-------------------------------------------------------------------------------------------------------------|
| Me511K                    | DIII-DIV | Missense   | Intractable epilepsy | NR | (Wang et al., 2012)                                                                                         |
| M1511R                    | DIII-DIV | Missense   | Epilepsy             | NR | (Lindy et al., 2018)                                                                                        |
| K1513NfsX<br>2            | DIII-DIV | FrameShift | DS                   | NR | (Wang et al., 2012)                                                                                         |
| L1514IfsX2<br>3 (De novo) | DIII-DIV | FrameShift | DS                   | NR | (Depienne et al., 2008)                                                                                     |
| L1514S(Ma<br>ternal)      | DIII-DIV | Missense   | DS                   | NR | (Depienne et al., 2008)                                                                                     |
| G1515R                    | DIII-DIV | Missense   | Epilepsy             | NR | (Lindy et al., 2018)                                                                                        |
| S1516X (De<br>novo)       | DIII-DIV | Nonsense   | DS                   | NR | (Sugawara et al., 2002; Harkin et al., 2007; Depienne et al., 2008; Riva et al., 2009; Zuberi et al., 2011) |
| S1516W                    | DIII-DIV | Missense   | DS                   | NR | (Xu et al., 2015)                                                                                           |
| S1516L                    | DIII-DIV | Missense   | Epilepsy             | NR | (Lindy et al., 2018)                                                                                        |
| K1518NfsX<br>21           | DIII-DIV | FrameShift | Epilepsy             | NR | (Depienne et al., 2008)                                                                                     |

|                              |          |            |          |                                                                                                                                                                              |                                             |
|------------------------------|----------|------------|----------|------------------------------------------------------------------------------------------------------------------------------------------------------------------------------|---------------------------------------------|
| K1517X                       | DIII-DIV | Nonsense   | DS       | NR                                                                                                                                                                           | (Xu et al., 2015)                           |
| K1518NfsX<br>21 (De<br>novo) | DIII-DIV | FrameShift | DS       | NR                                                                                                                                                                           | (Depienne et al., 2008)                     |
| P1519TfsX<br>18              | DIII-DIV | FrameShift | DS       | NR                                                                                                                                                                           | (Hesse et al., 2018)                        |
| P1519T                       | DIII-DIV | Missense   | SME      | Bilateral deactivation in the posterior cingulate cortex associated with the interictal epileptiform discharges together with deactivated areas in both parietal lobes (EEG) | (Moehring et al., 2013; Lindy et al., 2018) |
| P1519S                       | DIII-DIV | Missense   | Epilepsy | NR                                                                                                                                                                           | (Hesse et al., 2018)                        |
| P1519L                       | DIII-DIV | Missense   | Epilepsy | NR                                                                                                                                                                           | (Lindy et al., 2018)                        |
| Q1520KfsX<br>19 (De<br>novo) | DIII-DIV | FrameShift | DS       | Febrile Seizures<br>Partial Seizures                                                                                                                                         | (Kwong et al., 2012)                        |
| K1521SfsX<br>18              | DIII-DIV | FrameShift | Epilepsy | NR                                                                                                                                                                           | (Hesse et al., 2018)                        |
| I1523T                       | DIII-DIV | Missense   | SME      | Generalized tonic-clonic seizures<br>Febrile seizures                                                                                                                        | (Catarino et al., 2011)                     |

|                     |          |            |                                                |                                                                                           |                                                                                                                                                           |
|---------------------|----------|------------|------------------------------------------------|-------------------------------------------------------------------------------------------|-----------------------------------------------------------------------------------------------------------------------------------------------------------|
|                     |          |            |                                                | Austistic features<br>Behavioural problems                                                |                                                                                                                                                           |
| R1525X<br>(De novo) | DIII-DIV | Nonsense   | DS<br>SMEB<br>Myoclonic<br>astatic<br>epilepsy | Febrile seizures<br>Tonic-clonic seizures                                                 | (Kearney et al., 2006; Harkin et al., 2007; Depienne et al., 2008; Orrico et al., 2009; Vadlamudi et al., 2010; Zuberi et al., 2011; Djémié et al., 2016) |
| R1525Q              | DIII-DIV | Missense   | DS                                             | Shift steady state activation to more negative values                                     | (Binini et al., 2017; Cetica et al., 2017)                                                                                                                |
| P1526QfsX<br>13     | DIII-DIV | FrameShift | DS                                             | NR                                                                                        | (Zuberi et al., 2011)                                                                                                                                     |
| N1528K              | DIII-DIV | Missense   | DS                                             | NR                                                                                        | (Ishii et al., 2017)                                                                                                                                      |
| K1529NfsX<br>9      | DIII-DIV | FrameShift | DS                                             | Generalized tonic-clonic seizures<br>Mental retardation;<br>Obsessive-compulsive disorder | (Skjei et al., 2015)                                                                                                                                      |
| F1535fs             | DIII-DIV | FrameShift | SME                                            | NR                                                                                        | (Marini et al., 2007)                                                                                                                                     |
| V1538I              | DIVS1    | Missense   | SME<br>Acute<br>encephalopathy                 | NR                                                                                        | (Depienne et al., 2008)                                                                                                                                   |
| T1539P              | DIVS1    | Missense   | SME                                            | NR                                                                                        | (Verbeek et al., 2013)                                                                                                                                    |

## Supplementary Material

|                      |       |            |                                          |    |                                                                  |
|----------------------|-------|------------|------------------------------------------|----|------------------------------------------------------------------|
| F1543S(Ma<br>ternal) | DIVS1 | Missense   | Cyptogenic<br>focal<br>epilepsy<br>PEFS+ | NR | (Harkin et al., 2007; Kim et<br>al., 2014)                       |
| F1543fsX2            | DIVS1 | FrameShift | DS                                       | NR | (Zuberi et al., 2011)                                            |
| D1544H               | DIVS1 | Missense   | Epilepsy                                 | NR | (Lindy et al., 2018)                                             |
| D1544G<br>(De novo)  | DIVS1 | Missense   | DS                                       | NR | (Zuberi et al., 2011)                                            |
| D1544A<br>(De novo)  | DIVS1 | Missense   | DS                                       | NR | (Depienne et al., 2008)                                          |
| I1545V (De<br>novo)  | DIVS1 | Missense   | DS                                       | NR | (Harkin et al., 2007; Wang et<br>al., 2012; Cetica et al., 2017) |
| S1546fsX15<br>48     | DIVS1 | FrameShift | Intractable<br>epilepsy                  | NR | (Wang et al., 2012)                                              |
| M1548K               | DIVS1 | Missense   | DS                                       | NR | (Cetica et al., 2017)                                            |
| C1552Y               | DIVS1 | Misesense  | DS                                       | NR | (Wu et al., 2015)                                                |

|                                 |       |                      |          |                                                        |                         |
|---------------------------------|-------|----------------------|----------|--------------------------------------------------------|-------------------------|
| L1553HfsX<br>8                  | DIVS1 | FrameShift           | DS       | NR                                                     | (Zuberi et al., 2011)   |
| L1553_N15<br>54delinsHis<br>Ile | DIVS1 | In-frame<br>Deletion | DS       | NR                                                     | (Cetica et al., 2017)   |
| N1554KfsX<br>4                  | DIVS1 | FrameShift           | DS       | NR                                                     | (Lim et al., 2011)      |
| M1555R                          | DIVS1 | Missense             | DS       | NR                                                     | (Wang et al., 2012)     |
| M1558del                        | DIVS1 | In-frame<br>Deletion | DS       | NR                                                     | (Wang et al., 2012)     |
| M1558I                          | DIVS1 | Missense             | Epilepsy | NR                                                     | (Lindy et al., 2018)    |
| M1559K                          | DIVS1 | Missense             | DS       | Hemiclonic and<br>generalized tonic clonic<br>seizures | (Kumar et al., 2018)    |
| V1560EfsX<br>5                  | DIVS1 | FrameShift           | DS       | NR                                                     | (Wang et al., 2012)     |
| E1561K                          | DIVS2 | Missense             | DS       | NR                                                     | (Depienne et al., 2008) |
| E1561X                          | DIVS2 | Nonsense             | Epilepsy | NR                                                     | (Lindy et al., 2018)    |

|                                               |       |            |          |                                                                          |                                                                                                     |
|-----------------------------------------------|-------|------------|----------|--------------------------------------------------------------------------|-----------------------------------------------------------------------------------------------------|
| Q1565X                                        | DIVS2 | Nonsense   | Epilepsy | NR                                                                       | (Lindy et al., 2018)                                                                                |
| T1571TfsX<br>20                               | DIVS2 | FrameShift | SMEB     | NR                                                                       | (Wang et al., 2012)                                                                                 |
| S1574HfsX<br>17                               | DIVS2 | FrameShift | DS       | NR                                                                       | (Depienne et al., 2008)                                                                             |
| R1575C<br>(De novo;<br>Maternal;<br>Paternal) | DIVS2 | Missense   | DS       | Focal seizures<br>Mental deterioration<br>Enhanced persistent<br>current | (Depienne et al., 2008;<br>Ohmori et al., 2008; Lim et al.,<br>2011; Saitoh et al., 2012,<br>2015a) |
| I1576T                                        | DIVS2 | Missense   | DS       | NR                                                                       | (Tuncer et al., 2015)                                                                               |
| V1579E                                        | DIVS2 | Missense   | DS       | NR                                                                       | (Depienne et al., 2008)                                                                             |
| H1583R                                        | DIVS2 | Missense   | GEFS+    | Generalized tonic-<br>clonic seizures                                    | (Hattori et al., 2008) (Tan et<br>al., 2012)                                                        |
| T1585fsX6                                     | DIVS2 | FrameShift | DS       | NR                                                                       | (Wang et al., 2012)                                                                                 |
| G1586E<br>(De novo)                           | DIVS2 | Missense   | DS       | NR                                                                       | (Depienne et al., 2008; Sun et<br>al., 2010; Zuberi et al., 2011)                                   |

|                           |       |            |          |    |                                                                              |
|---------------------------|-------|------------|----------|----|------------------------------------------------------------------------------|
| C1588R<br>(De novo)       | DIVS2 | Missense   | DS       | NR | (Marini et al., 2007; Zuberi et al., 2011; Mercimek-Mahmutoglu et al., 2015) |
| C1588LfsX<br>21 (De novo) | DIVS2 | FrameShift | DS       | NR | (Orrico et al., 2009)                                                        |
| C1588X                    | DIVS2 | Nonsense   | DS       | NR | (Cetica et al., 2017)                                                        |
| Val1589Gly                | DIVS2 | Missense   | DS       | NR | (Xu et al., 2015)                                                            |
| Leu1590Pro                | DIVS2 | Missense   | EE       | NR | (Ostrander et al., 2018)                                                     |
| Lys1591X                  | DIVS2 | Nonsense   | DS       | NR | (Wang et al., 2012)                                                          |
| Leu1592His                | DIVS2 | Missense   | SMEB     | NR | (Zuberi et al., 2011)                                                        |
| Leu1592Pro                | DIVS2 | Missense   | DS       | NR | (Zuberi et al., 2011)                                                        |
| Ile1593LeufsX15           | DIVS2 | FrameShift | Epilepsy | NR | (Lindy et al., 2018)                                                         |
| Ile1593Asn                | DIVS2 | Missense   | DS       | NR | (Cho et al., 2018)                                                           |

|                                      |          |            |           |                                                         |                                                       |
|--------------------------------------|----------|------------|-----------|---------------------------------------------------------|-------------------------------------------------------|
| Ser1594Tyr<br>fsX14                  | DIVS2    | FrameShift | DS        | NR                                                      | (Wang et al., 2012)                                   |
| Leu1595Thr<br>fsX13                  | DIVS2    | FrameShift | DS        | NR                                                      | (Wang et al., 2012)                                   |
| Arg1596Cys<br>(De novo;<br>Paternal) | DIVS2-S3 | Missense   | FS+<br>DS | Myoclonic seizures<br>Generalized tonic-clonic seizures | (Dlugos et al., 2007; Hoffman-Zacharska et al., 2015) |
| Arg1596His<br>(Paternal)             | DIVS2-S3 | Missense   | GEFS+     | NR                                                      | (Hoffman-Zacharska et al., 2015)                      |
| R1596L                               | DIVS2-S3 | Missense   | DS        | NR                                                      | (Depienne et al., 2008)                               |
| Y1598F                               | DIVS2-S3 | Missense   | GEFS+     | NR                                                      | (Lindy et al., 2018)                                  |
| Y1598X                               | DIVS2-S3 | Nonsense   | DS        | NR                                                      | (Harkin et al., 2007)                                 |
| I1602LfsX16<br>(De novo)             | DIVS2-S3 | FrameShift | DS        | NR                                                      | (Yang et al., 2017)                                   |
| W1604X                               | DIVS3    | Nonsense   | DS        | NR                                                      | (Xu et al., 2015)                                     |



|                             |       |            |          |    |                                             |
|-----------------------------|-------|------------|----------|----|---------------------------------------------|
| N1605S (De novo)            | DIVS3 | Missense   | SMEB     | NR | (Zuberi et al., 2011)                       |
| N1605I                      | DIVS3 | Missense   | DS       | NR | (Parrini et al., 2017)                      |
| F1607X                      | DIVS3 | Nonsense   | DS       | NR | (Harkin et al., 2007; Parrini et al., 2017) |
| F1607LfsX<br>11             | DIVS3 | FrameShift | Epilepsy | NR | (Lindy et al., 2018)                        |
| D1608Y<br>(De novo)         | DIVS3 | Missense   | DS       | NR | (Marini et al., 2007; Xu et al., 2014)      |
| D1608VfsX<br>10 (De novo)   | DIVS3 | FrameShift | DS       | NR | (Sun et al., 2010)                          |
| D1608G<br>(De novo)         | DIVS3 | Missense   | DS       | NR | (Wang et al., 2012)                         |
| F1609LfsX<br>1610 (De novo) | DIVS3 | FrameShift | DS       | NR | (Depienne et al., 2008)                     |
| V1610fsX3<br>3              | DIVS3 | FrameShift | DS       | NR | (Xu et al., 2014)                           |
| 11611WfsX<br>8              | DIVS3 | FrameShift | DS       | NR | (Xu et al., 2015)                           |

|                                   |       |            |                      |                                                                                                                                                                                        |                                                               |
|-----------------------------------|-------|------------|----------------------|----------------------------------------------------------------------------------------------------------------------------------------------------------------------------------------|---------------------------------------------------------------|
| V1611F<br>(Maternal)              | DIVS3 | Missense   | GEFS+<br>ICEGTC      | Generalized tonic-clonic seizure<br><br>Enhanced persistent current<br><br>Shift steady state activation and inactivation to more negative values                                      | (Fujiwara, 2003; Rhodes et al., 2005)                         |
| V1612I<br>(Paternal;<br>Maternal) | DIVS3 | Missense   | DS                   | Febrile Seizures<br>Partial and generalized tonic-clonic seizures<br><br>Absence seizure<br><br>Moderate Intellectual disability<br><br>Focal sharp waves; spike-wave discharges (EEG) | (Depienne et al., 2008; Kwong et al., 2012; Lee et al., 2014) |
| L1614PfsX4<br>(De novo)           | DIVS3 | FrameShift | DS                   | NR                                                                                                                                                                                     | (Zuberi et al., 2011)                                         |
| S1615fs                           | DIVS3 | FrameShift | SME                  | Focal spikes (EEG)                                                                                                                                                                     | (Lee et al., 2014)                                            |
| I1616T<br>(Paternal)              | DIVS3 | Missense   | PEFS+                | NR                                                                                                                                                                                     | (Hattori et al., 2008; Shi et al., 2012)                      |
| M1619V<br>(Maternal)              | DIVS3 | Missense   | Intractable Epilepsy | NR                                                                                                                                                                                     | (Wang et al., 2012)                                           |
| F1620V                            | DIVS3 | Missense   | GEFS+                | NR                                                                                                                                                                                     | (Cetica et al., 2017)                                         |

|                   |          |          |                       |                                                                                                                                                          |                                           |
|-------------------|----------|----------|-----------------------|----------------------------------------------------------------------------------------------------------------------------------------------------------|-------------------------------------------|
| L1624Q(Maternal)  | DIVS3    | Missense | Focal Family Epilepsy | NR                                                                                                                                                       | (Oates et al., 2018)                      |
| L1624P (Maternal) | DIVS3    | Missense | FHM                   | Enhanced persistent current<br>Delayed fast inactivation<br>Faster recovery from inactivation<br>Shift steady state inactivation to more positive values | (Fan et al., 2016)                        |
| T1628X (De novo)  | DIVS3    | Nonsense | DS                    | NR                                                                                                                                                       | (Sun et al., 2010)                        |
| V1630M (Familial) | DIVS3-S4 | Missense | DS                    | NR                                                                                                                                                       | (Marini et al., 2007)                     |
| V1630L (Maternal) | DIVS3-S4 | Missense | SMEB                  | Acute encephalopathy<br>Moderate neurologic sequelae                                                                                                     | (Okumura et al., 2012; Wang et al., 2012) |
| V1630G            | DIVS3-S4 | Missense | DS                    | NR                                                                                                                                                       | (Djémié et al., 2016)                     |
| S1631C            | DIVS3-S4 | Missense | DS                    | Multifocal spikes (EEG)                                                                                                                                  | (Haginoya et al., 2018)                   |
| P1632S            | DIVS3-S4 | Missense | ICEGTC                | Generalizes tonic-clonic<br>Severe mental delay                                                                                                          | (Fujiwara, 2003)                          |

|                      |          |            |                                                 |                                                                                    |                                                                                 |
|----------------------|----------|------------|-------------------------------------------------|------------------------------------------------------------------------------------|---------------------------------------------------------------------------------|
| T1633YfsX<br>10      | DIVS3-S4 | FrameShift | Epilepsy                                        | NR                                                                                 | (Lindy et al., 2018)                                                            |
| L1634CfsX<br>4       | DIVS3-S4 | FrameShift | DS                                              | Generalized tonic-clonic seizures<br><br>Focal tonic and myoclonic seizures        | (Rilstone et al., 2012)                                                         |
| F1635L<br>(Maternal) | DIVS4    | Missense   | GEFS+                                           | NR                                                                                 | (Zhang et al., 2015)                                                            |
| R1636X<br>(De novo)  | DIVS4    | Nonsense   | SMEB<br>DS                                      | NR                                                                                 | (Lim et al., 2011; Zuberi et al., 2011; Cetica et al., 2017; Tsai et al., 2018) |
| R1636Q(De novo)      | DIVS4    | Missense   | DS<br>LGS                                       | Epileptic encephalopathy<br><br>Myoclonic seizures<br><br>Dystonia, and spasticity | (Harkin et al., 2007; Butler et al., 2017b)                                     |
| R1636P (De novo)     | DIVS4    | Missense   | Malignant migrating partial seizures of infancy | NR                                                                                 | (Gokben et al., 2017)                                                           |
| V1637E<br>(De novo)  | DIVS4    | Missense   | DS                                              | Episodes of status epilepticus triggered by fever- unresponsive to medications     | (Nishri et al., 2010; Zuberi et al., 2011)                                      |
| I1638VfsX1<br>1      | DIVS4    | FrameShift | DS                                              | NR                                                                                 | (Depienne et al., 2008)                                                         |

|                      |       |            |          |                                   |                         |
|----------------------|-------|------------|----------|-----------------------------------|-------------------------|
| I1638T (De novo)     | DIVS4 | Missense   | DS       | NR                                | (Zuberi et al., 2011)   |
| I1638N (De novo)     | DIVS4 | Missense   | DS       | NR                                | (Wang et al., 2012)     |
| R1639G               | DIVS4 | Missense   | DS       | NR                                | (Depienne et al., 2008) |
| R1639VfsX11          | DIVS4 | FrameShift | DS       | NR                                | (Kumar et al., 2018)    |
| R1639P               | DIVS4 | Missense   | Epilepsy | NR                                | (Lindy et al., 2018)    |
| A1641T (Mosaic)      | DIVS4 | Missense   | DS       | NR                                | (Yang et al., 2017)     |
| R1642M               | DIVS4 | Missense   | SME      | Generalized tonic-clonic seizures | (Lee et al., 2014)      |
| R1642S (De novo)     | DIVS4 | Missense   | DS       | NR                                | (Wang et al., 2012)     |
| I1643LfsX7 (De novo) | DIVS4 | FrameShift | SME      | NR                                | (Gaily et al., 2013)    |
| R1642S               | DIVS4 | Missense   | Epilepsy | NR                                | (Lindy et al., 2018)    |

## Supplementary Material

|                      |       |          |          |                                                                                                                                              |                                                                                                                                                |
|----------------------|-------|----------|----------|----------------------------------------------------------------------------------------------------------------------------------------------|------------------------------------------------------------------------------------------------------------------------------------------------|
| G1644D               | DIVS4 | Missense | Epilepsy | NR                                                                                                                                           | (Lindy et al., 2018)                                                                                                                           |
| R1645X<br>(De novo)  | DIVS4 | Nonsense | DS       | Generalized spike and wave, polyspike and wave discharges with photosensitivity (EEG)                                                        | (Fukuma et al., 2004; Harkin et al., 2007; Marini et al., 2007; Gökben et al., 2009; Zuberi et al., 2011; Wang et al., 2012; Cho et al., 2018) |
| R1645Q<br>(De novo)  | DIVS4 | Missense | DS       | NR                                                                                                                                           | (Harkin et al., 2007; Oates et al., 2018)                                                                                                      |
| R1645P               | DIVS4 | Missense | DS       | NR                                                                                                                                           | (Xu et al., 2015)                                                                                                                              |
| R1648C               | DIVS4 | Missense | DS       | Increase current density<br>Shift steady state activation to more positive values<br>Shift steady state inactivation to more negative values | (Ohmori et al., 2002; Rhodes et al., 2005; Orrico et al., 2009; Zuberi et al., 2011)                                                           |
| R1648H<br>(Paternal) | DIVS4 | Missense | GEFS+    | Enhanced persistent current<br>Delayed inactivation                                                                                          | (Alekov et al., 2000; Escayg et al., 2000; Spampinato et al., 2001; Rhodes et al., 2004; Depienne et al., 2008)                                |
| R1648L               | DIVS4 | Missense | Epilepsy | NR                                                                                                                                           | (Lindy et al., 2018)                                                                                                                           |
| L1649Q(Paternal)     | DIVS4 | Missense | FHM      | NR                                                                                                                                           | (Vanmolkot et al., 2007)                                                                                                                       |

|                                  |          |            |            |                                                                                                                                         |                                                 |
|----------------------------------|----------|------------|------------|-----------------------------------------------------------------------------------------------------------------------------------------|-------------------------------------------------|
| K1651QfsX<br>22 (De<br>novo)     | DIVS4    | FrameShift | SMEB       | NR                                                                                                                                      | (Harkin et al., 2007)                           |
| G1652X                           | DIVS4    | Nonsense   | DS         | NR                                                                                                                                      | (Depienne et al., 2008)                         |
| A1653E                           | DIVS4    | Missense   | SMEB       | NR                                                                                                                                      | (Zuberi et al., 2011)                           |
| I1656S (De<br>novo)              | DIVS4    | Missense   | DS         | NR                                                                                                                                      | (Usluer et al., 2016)                           |
| I1656M<br>(Maternal)             | DIVS4    | Missense   | GEFS+      | Shift steady state<br>activation to more<br>positive values                                                                             | (Lossin et al., 2003)                           |
| R1657C<br>(Maternal)             | DIVS4    | Missense   | DS         | Decrease current<br>density<br>Shift steady state<br>activation to more<br>positive values<br>Faster recovery from<br>slow inactivation | (Lossin et al., 2003)                           |
| R1657H                           | DIVS4    | Missense   | GEFS+      | Febrile seizures<br>Focal seizures<br>Generalized tonic-<br>clonic seizures                                                             | (Harkin et al., 2007; Catarino<br>et al., 2011) |
| T1658R (De<br>novo;<br>Maternal) | DIVS4-S5 | Missense   | SMEB<br>DS | NR                                                                                                                                      | (Marini et al., 2007; Depienne<br>et al., 2008) |
| T1658M<br>(Maternal)             | DIVS4-S5 | Missense   | DS<br>SME  | NR                                                                                                                                      | (Depienne et al., 2008)                         |

|                             |          |                    |           |                                                                                          |                                             |
|-----------------------------|----------|--------------------|-----------|------------------------------------------------------------------------------------------|---------------------------------------------|
| L1659M                      | DIVS4-S5 | Missense           | DS        | NR                                                                                       | (Cetica et al., 2017)                       |
| L1660P                      | DIVS4-S5 | Missense           | SME<br>DS | NR                                                                                       | (Zuberi et al., 2011; Rodda et al., 2012)   |
| F1661L<br>(Maternal)        | DIVS4-S5 | Missense           | FHM       | NR                                                                                       | (Weller et al., 2014)                       |
| F1661S (De novo)            | DIVS4-S5 | Missense           | DS        | Reduce current density<br>Enhanced persistent current                                    | (Claes et al., 2003; Rhodes et al., 2004)   |
| A1662V                      | DIVS4-S5 | Missense           | SMEB      | NR                                                                                       | (Wang et al., 2012)                         |
| L1663FfsX<br>10 (De novo)   | DIVS4-S5 | FrameShift         | DS        | NR                                                                                       | (Zuberi et al., 2011)                       |
| M1664K<br>(Maternal)        | DIVS4-S5 | Missense           | DS        | Reduced current density (92%) associated with reduction of cell surface expression (95%) | (Depienne et al., 2008; Bechi et al., 2015) |
| S1666fsX7                   | DIVS4-S5 | FrameShift         | SME       | NR                                                                                       | (Xu et al., 2014)                           |
| M1665_S1666insIle (De novo) | DIVS4-S5 | In-frame Insertion | DS        | NR                                                                                       | (Yang et al., 2017)                         |



|                   |          |            |                                                 |                                                                                                     |                                          |
|-------------------|----------|------------|-------------------------------------------------|-----------------------------------------------------------------------------------------------------|------------------------------------------|
| M1665I            | DIVS4-S5 | Missense   | Epilepsy                                        | NR                                                                                                  | (Lindy et al., 2018)                     |
| S1666F            | DIVS4-S5 | Missense   | DS                                              | NR                                                                                                  | (Xu et al., 2015)                        |
| L1667P (De novo)  | DIVS4-S5 | Missense   | DS                                              | NR                                                                                                  | (Zuberi et al., 2011; Wang et al., 2012) |
| P1668A (Maternal) | DIVS4-S5 | Missense   | DS                                              | NR                                                                                                  | (Nabbout et al., 2003)                   |
| P1668R (Maternal) | DIVS4-S5 | Missense   | SME                                             | NR                                                                                                  | (Huang et al., 2014)                     |
| P1668fsX12        | DIVS4-S5 | FrameShift | SME                                             | NR                                                                                                  | (Xu et al., 2014)                        |
| P1668L            | DIVS4-S5 | Missense   | SMEB                                            | NR                                                                                                  | (Zuberi et al., 2011)                    |
| A1669T            | DIVS4-S5 | Missense   | NR                                              | Moderate/Severe developmental delay<br>Epilepsy with continuous spikes and waves during sleep (EEG) | (Fry et al., 2016)                       |
| A1669E            | DIVS4-S5 | Missense   | Malignant migrating partial seizures of infancy | Left arm clonic activity<br>Microcephaly (autopsy)                                                  | (Freilich et al., 2011)                  |

|                        |          |            |                                                  |                                                                                                                                                                                                                              |                                                                                       |
|------------------------|----------|------------|--------------------------------------------------|------------------------------------------------------------------------------------------------------------------------------------------------------------------------------------------------------------------------------|---------------------------------------------------------------------------------------|
| L1670W<br>(Maternal)   | DIVS4-S5 | Missense   | FHM3                                             | Reduced current density<br>Shift steady state activation and inactivation to more positive values<br>Incomplete inactivation<br>faster recovery from fast inactivation<br>Resistance to entry into closed state inactivation | (Zhang et al., 2017; Dhifallah et al., 2018; Bertelli et al., 2019)                   |
| F1671fsX8<br>(De novo) | DIVS4-S5 | FrameShift | DS                                               | Generalized tonic-clonic seizures<br>Severe mental retardation                                                                                                                                                               | (Claes et al., 2001; Sugawara et al., 2002; Depienne et al., 2008; Riva et al., 2009) |
| N1672H                 | DIVS4-S5 | Missense   | SME                                              | NR                                                                                                                                                                                                                           | (Xu et al., 2014)                                                                     |
| N1672I                 | DIVS4-S5 | Missense   | DS                                               | NR                                                                                                                                                                                                                           | (Zuberi et al., 2011)                                                                 |
| I1673T                 | DIVS5    | Missense   | DS<br>GEFS+                                      | Generalized tonic-clonic seizure with fever                                                                                                                                                                                  | (Skjei et al., 2015)                                                                  |
| I1673N                 | DIVS5    | Missense   | DS                                               | NR                                                                                                                                                                                                                           | (Cetica et al., 2017)                                                                 |
| G1674S<br>(Maternal)   | DIVS5    | Missense   | FS+<br>Hemiconvulsions<br>hemiplegia<br>epilepsy | Febrile seizure<br>Hemiconvulsion                                                                                                                                                                                            | (Saitoh et al., 2015a)                                                                |
| G1674R(De novo)        | DIVS5    | Missense   | DS                                               | NR                                                                                                                                                                                                                           | (Ohmori et al., 2002; Depienne et al., 2008)                                          |

|                       |       |             |                         |                                                      |                                                              |
|-----------------------|-------|-------------|-------------------------|------------------------------------------------------|--------------------------------------------------------------|
| Leu1675P<br>(De novo) | DIVS5 | Missense    | DS                      | NR                                                   | (Yang et al., 2017)                                          |
| L1677F                | DIVS5 | Missense    | DS                      | NR                                                   | (Depienne et al., 2008; Lim et al., 2011; Wang et al., 2012) |
| M1681CfsX<br>34       | DIVS5 | FrameShift  | DS                      | NR                                                   | (Depienne et al., 2008)                                      |
| M1681Kfs<br>X35       | DIVS5 | Frame Shift | DS                      | NR                                                   | (Riva et al., 2009)                                          |
| F1682S                | DIVS5 | Missense    | DS                      | Severe psycomotor<br>retardation                     | (Fukuma et al., 2004)                                        |
| I1683T (De<br>novo)   | DIVS5 | Missense    | DS<br>SMEB              | NR                                                   | (Zuberi et al., 2011; Wang et al., 2012; Lee et al., 2014)   |
| Y1684D                | DIVS5 | Missense    | DS                      | NR                                                   | (Zuberi et al., 2011)                                        |
| Y1684S                | DIVS5 | Missense    | Intractable<br>Epilepsy | NR                                                   | (Wang et al., 2012)                                          |
| Y1684X<br>(De novo)   | DIVS5 | Nonsense    | SMEB                    | NR                                                   | (Zuberi et al., 2011)                                        |
| A1685D(De<br>novo)    | DIVS5 | Missense    | DS                      | Spike-wave complex<br>(EEG)<br>Non-fuctional channel | (Fujiwara, 2003) (Sugiura et al., 2012)                      |

## Supplementary Material

|                              |       |            |                                           |                                                                                                                                  |                                                               |
|------------------------------|-------|------------|-------------------------------------------|----------------------------------------------------------------------------------------------------------------------------------|---------------------------------------------------------------|
| A1685V                       | DIVS5 | Missense   | PEFS+                                     | Frequent seizures, both febrile and afebrile, during infancy and subsequently developed epilepsies<br><br>Non functional channel | (Sugawara et al., 2001)<br>(Sugiura et al., 2012)             |
| F1687S<br>(Familial)         | DIVS5 | Missense   | Myoclonic<br>astatic<br>epilepsy<br>GEFS+ | NR                                                                                                                               | (Marini et al., 2007; Cetica et al., 2017)                    |
| G1688W<br>(De novo)          | DIVS5 | Missense   | DS                                        | NR                                                                                                                               | (Zuberi et al., 2011)                                         |
| G1688V                       | DIVS5 | Missense   | DS                                        | NR                                                                                                                               | (Xu et al., 2015)                                             |
| M1689R                       | DIVS5 | Missense   | DS                                        | NR                                                                                                                               | (Ishii et al., 2017)                                          |
| S1690AfsX<br>25              | DIVS5 | FrameShift | DS                                        | NR                                                                                                                               | (Ream and Mikati, 2014)                                       |
| F1692S (De<br>novo)          | DIVS5 | Missense   | DS                                        | NR                                                                                                                               | (Wang et al., 2012)                                           |
| Y1694YfsX<br>22 (De<br>novo) | DIVS5 | FrameShift | DS                                        | NR                                                                                                                               | (Zuberi et al., 2011)                                         |
| Y1694C<br>(De novo)          | DIVS5 | Missense   | DS                                        | Myoclonic seizures<br>Atypical absence                                                                                           | (Fukuma et al., 2004; Wang et al., 2012; Cetica et al., 2017) |

|                           |          |            |          | Severe psychomotor retardation |                         |
|---------------------------|----------|------------|----------|--------------------------------|-------------------------|
| Y1694X                    | DIVS5    | Nonsense   | DS       | NR                             | (Xu et al., 2015)       |
| V1695LfsX<br>20 (De novo) | DIVS5    | FrameShift | DS       | NR                             | (Depienne et al., 2008) |
| K1696EfsX<br>6 (De novo)  | DIVS5    | FrameShift | DS       | NR                             | (Orrico et al., 2009)   |
| I1701DfsX3<br>(De novo)   | DIVS5-S6 | FrameShift | DS       | NR                             | (Wang et al., 2012)     |
| D1702H                    | DIVS5-S6 | Missense   | DS       | NR                             | (Cetica et al., 2017)   |
| D1702Y                    | DIVS5-S6 | Missense   | Epilepsy | NR                             | (Lindy et al., 2018)    |
| D1702E                    | DIVS5-S6 | Missense   | SME      | NR                             | (Xu et al., 2014)       |
| D1703Y                    | DIVS5-S6 | Missense   | DS       | NR                             | (Ishii et al., 2017)    |
| D1703V                    | DIVS5-S6 | Missense   | SME      | NR                             | (Xu et al., 2014)       |

## Supplementary Material

|                      |          |          |          |                                                                                                               |                                           |
|----------------------|----------|----------|----------|---------------------------------------------------------------------------------------------------------------|-------------------------------------------|
| F1707V               | DIVS5-S6 | Missense | DS       | NR                                                                                                            | (Harkin et al., 2007; Rodda et al., 2012) |
| F1707L               | DIVS5-S6 | Missense | Epilepsy | NR                                                                                                            | (Lindy et al., 2018)                      |
| T1709P               | DIVS5-S6 | Missense | DS       | NR                                                                                                            | (Haginoya et al., 2018)                   |
| T1709I<br>(Maternal) | DIVS5-S6 | Missense | ICEGTC   | Spike-wave complex and multifocal spikes (EEG)<br>Non-functional channel                                      | (Fujiwara, 2003) (Rhodes et al., 2005)    |
| T1709N               | DIVS5-S6 | Missense | DS       | NR                                                                                                            | (Cetica et al., 2017)                     |
| G1711S               | DIVS5-S6 | Missense | Epilepsy | NR                                                                                                            | (Lindy et al., 2018)                      |
| N1712K               | DIVS5-S6 | Missense | DS       | NR                                                                                                            | (Ishii et al., 2017)                      |
| S1713N               | DIVS5-S6 | Missense | DS       | Focal spikes in the right parietal region; sharp waves over the left frontal region in the sleep record (EEG) | (Kimura et al., 2005)                     |
| A1713D<br>(De novo)  | DIVS5-S6 | Missense | DS       | Febrile seizures, Hemiclonic, generalized tonic clonic seizures<br>Focal spike-waves complex (EEG)            | (Liu et al., 2018)                        |

|                      |          |            |                                |                                                                                                    |                                             |
|----------------------|----------|------------|--------------------------------|----------------------------------------------------------------------------------------------------|---------------------------------------------|
| M1714V<br>(Maternal) | DIVS5-S6 | Missense   | GEFS+                          | NR                                                                                                 | (Tsai et al., 2018)                         |
| M1714R<br>(De novo)  | DIVS5-S6 | Missense   | DS                             | NR                                                                                                 | (Riva et al., 2009; Zuberi et al., 2011)    |
| M1714K               | DIVS5-S6 | Missense   | DS                             | NR                                                                                                 | (Depienne et al., 2008)                     |
| C1716R<br>(De novo)  | DIVS5-S6 | Missense   | SMEB<br>Epilepsy<br>and/or NDD | Febril convulsions<br>Afebril concussions<br>Parcial seizures<br>Generalized spikes-<br>wave (EEG) | (Marini et al., 2007; Lindy et al., 2018)   |
| L1717P<br>(De novo)  | DIVS5-S6 | Missense   | SME                            | Generalized tonic clonic<br>seizure                                                                | (Verbeek et al., 2013)                      |
| T1721R<br>(De novo)  | DIVS5-S6 | Missense   | DS                             | NR                                                                                                 | (Harkin et al., 2007)                       |
| T1721K               | DIVS5-S6 | Missense   | Ep and/or<br>NDD               | Seizures                                                                                           | (Retterer et al., 2016; Lindy et al., 2018) |
| I1722FfsX4<br>6      | DIVS5-S6 | Frameshift | DS                             | Not reported                                                                                       | (Ko et al., 2018)                           |
| T1722A<br>(De novo)  | DIVS5-S6 | Missense   | DS                             | Myoclonic, hemiclonic<br>Focal seizures                                                            | (Wu et al., 2015)                           |

|                     |          |            |                         |    |                         |
|---------------------|----------|------------|-------------------------|----|-------------------------|
| S1723F              | DIVS5-S6 | Missense   | Ep and/or<br>NDD        | NR | (Lindy et al., 2018)    |
| A1724P              | DIVS5-S6 | Missense   | Intractable<br>Epilepsy | NR | (Wang et al., 2012)     |
| A1724T<br>(De novo) | DIVS5-S6 | Missense   | DS                      | NR | (Ishii et al., 2017)    |
| G1725C<br>(De novo) | DIVS5-S6 | Missense   | DS                      | NR | (Depienne et al., 2008) |
| W1726R<br>(De novo) | DIVS5-S6 | Missense   | DS                      | NR | (Harkin et al., 2007)   |
| W1726X              | DIVS5-S6 | Nonsense   | DS                      | NR | (Zuberi et al., 2011)   |
| G1728S.fsX<br>4     | DIVS5-S6 | Frameshift | Ep and/or<br>NDD        | NR | (Lindy et al., 2018)    |
| D1727G<br>(De novo) | DIVS5-S6 | Missense   | DS                      | NR | (Wang et al., 2012)     |
| L1729W<br>(De novo) | DIVS5-S6 | Missense   | DS                      | NR | (Ishii et al., 2017)    |



|                             |          |            |                                                      |                                                                                        |                         |
|-----------------------------|----------|------------|------------------------------------------------------|----------------------------------------------------------------------------------------|-------------------------|
| L1730P                      | DIVS5-S6 | Missense   | Ep and/or<br>NDD                                     | NR                                                                                     | (Lindy et al., 2018)    |
| A1731P<br>(De novo)         | DIVS5-S6 | Missense   | DS                                                   | NR                                                                                     | (Ishii et al., 2017)    |
| I1733FfsX4<br>6             | DIVS5-S6 | Frameshift | DS                                                   | Generalized tonic clonic<br>seizure<br>Atonic, complex partial<br>and absence seizures | (de Lange et al., 2018) |
| L1729FfsX<br>9<br>(De novo) | DIVS5-S6 | Frameshift | DS                                                   | NR                                                                                     | (Depienne et al., 2008) |
| P1732L<br>(De novo)         | DIVS5-S6 | Missense   | DS                                                   | NR                                                                                     | (Djémié et al., 2016)   |
| N1733D                      | DIVS5-S6 | Missense   | DS<br>GEFS+                                          | Generalized tonic clonic<br>seizure                                                    | (Tan et al., 2012)      |
| L1734P                      | DIVS5-S6 | Missense   | Ep and/or<br>NDD                                     | NR                                                                                     | (Lindy et al., 2018)    |
| P1739L                      | DIVS5-S6 | Missense   | GEFS+<br>FS+                                         | NR                                                                                     | (Zuberi et al., 2011)   |
| D1740N                      | DIVS5-S6 | Missense   | FS+/FS+<br>and focal<br>seizures<br>Ep and/or<br>NDD | NR                                                                                     | (Lindy et al., 2018)    |

## Supplementary Material

|                     |          |            |                        |                                                                                              |                                           |
|---------------------|----------|------------|------------------------|----------------------------------------------------------------------------------------------|-------------------------------------------|
| C1741R<br>(De novo) | DIVS5-S6 | Missense   | DS                     | NR                                                                                           | (Wang et al., 2012)                       |
| C1741S<br>(De novo) | DIVS5-S6 | Missense   | TLT-MTS                | Febrile status epilepticus                                                                   | (Tiefes et al., 2019)                     |
| C1741S<br>(De novo) | DIVS5-S6 | Missense   | LGS                    | NR                                                                                           | (Allen et al., 2013)                      |
| C1741Y              | DIVS5-S6 | Missense   | DS<br>Ep and/or<br>NDD | NR                                                                                           | (Xu et al., 2015; Lindy et al., 2018)     |
| D1742G              | DIVS5-S6 | Missense   | PEFS+                  | Myoclonic atstatic seizures<br>Febrile seizures<br>Generalized tonic-clonic seizure          | (Pineda-Trujillo et al., 2005)            |
| G1746W              | DIVS5-S6 | Missense   | DS                     | NR                                                                                           | (Esterhuizen et al., 2018)                |
| 1747Nfs177<br>9X    | DIVS5-S6 | Frameshift | DS                     | NR                                                                                           | (Margherita Mancardi et al., 2006)        |
| G1749E<br>(De novo) | DIVS5-S6 | Missense   | DS                     | Generalized tonic-clonic seizures<br>Complex partial seizures<br><br>Reduced current density | (Claes et al., 2003; Rhodes et al., 2005) |

|                               |          |                              |                  |                                                              |                         |
|-------------------------------|----------|------------------------------|------------------|--------------------------------------------------------------|-------------------------|
| S1750fsX17<br>78<br>(De novo) | DIVS5-S6 | Deletion<br>and<br>insertion | DS               | NR                                                           | (Sun et al., 2010)      |
| S1751GfsX<br>29               | DIVS5-S6 | Frameshift                   | DS               | NR                                                           | (Xu et al., 2015)       |
| G1754V                        | DIVS5-S6 | Missense                     | Ep and/or<br>NDD | NR                                                           | (Lindy et al., 2018)    |
| G1754R<br>(De novo)           | DIVS5-S6 | Missense                     | DS               | Focal seizures<br>Hemiconvulsions                            | (Petrelli et al., 2012) |
| D1755G                        | DIVS5-S6 | Missense                     | SME              | NR                                                           | (Xu et al., 2014)       |
| C1756G                        | DIVS5-S6 | Missense                     | SMEB             | Febrile seizures with<br>generalized tonic clonic<br>seizure | (Herini et al., 2010)   |
| G1757R<br>(De novo)           | DIVS5-S6 | Missense                     | DS               | NR                                                           | (Djémié et al., 2016)   |
| G1757E                        | DIVS5-S6 | Missense                     | Ep and/or<br>NDD | NR                                                           | (Lindy et al., 2018)    |
| N1758IfsX3<br>5               | DIVS5-S6 | Frameshift                   | Ep and/or<br>NDD | NR                                                           | (Lindy et al., 2018)    |

## Supplementary Material

|                                  |       |            |                  |                                                              |                                    |
|----------------------------------|-------|------------|------------------|--------------------------------------------------------------|------------------------------------|
| F1764fsX17                       | DIVS6 | Frameshift | SME              | NR                                                           | (Xu et al., 2014)                  |
| G1762E<br>(De novo)              | DIVS6 | Missense   | DS               | NR                                                           | (Margherita Mancardi et al., 2006) |
| I1763F<br><br>De novo            | DIVS6 | Missense   | DS               | NR                                                           | (Zuberi et al., 2011)              |
| I1763N<br><br>De novo            | DIVS6 | Missense   | DS               | NR                                                           | (Zuberi et al., 2011)              |
| F1764Y                           | DIVS6 | Missense   | Ep and/or<br>NDD | NR                                                           | (Lindy et al., 2018)               |
| F1765fsX17<br>94                 | DIVS6 | Frameshift | DS               | Generalized tonic-clonic seizures<br>Multifocal spikes (EEG) | (Fujiwara, 2003)                   |
| F1765L<br>De novo                | DIVS6 | Missense   | PEFS+            | Complete absence of sodium current                           | (Liao et al., 2010)                |
| F1765delX1<br>777<br><br>De novo | DIVS6 | Frameshift | DS               | Febrile convulsions<br>Generalized spike-wave (EEG)          | (Marini et al., 2007)              |

|                       |       |                   |                              |                                                                               |                            |
|-----------------------|-------|-------------------|------------------------------|-------------------------------------------------------------------------------|----------------------------|
| F1756del              | DIVS6 | In-frame deletion | SMEB                         | NR                                                                            | (Fukuma et al., 2004)      |
| F1766CfsX28           | DIVS6 | Frameshift        | DS                           | NR                                                                            | (Xu et al., 2015)          |
| S1768R<br><br>De novo | DIVS6 | Missense          | DS                           | Absences and tonic-clonic seizures                                            | (Willemsen et al., 2012)   |
| I1770F                | DIVS6 | Missense          | DS                           | NR                                                                            | (Zuberi et al., 2011)      |
| I1770HfsX24           | DIVS6 | Frameshift        | Ep and/or NDD                | NR                                                                            | (Lindy et al., 2018)       |
| I1770N                | DIVS6 | Missense          | DS<br><br>Secondary epilepsy | Encephalopathic<br>Movement disorder<br>Cognitive regression                  | (Tang et al., 2011)        |
| I1770T                | DIVS6 | Missense          | SMEB                         | NR                                                                            | (Zuberi et al., 2011)      |
| I1771N                | DIVS6 | Missense          | DS                           | NR                                                                            | (Depienne et al., 2008)    |
| A1772T<br><br>De novo | DIVS6 | Missense          | DS                           | Febrile seizures<br>Focal to bilateral tonic-clonic<br>Focal spike wave (EEG) | (Esterhuizen et al., 2018) |

## Supplementary Material

|                   |       |          |     |                            |                                               |
|-------------------|-------|----------|-----|----------------------------|-----------------------------------------------|
| S1773F<br>De novo | DIVS6 | Missense | DS  | NR                         | (Margherita Mancardi et al., 2006)            |
| F1774S            | DIVS6 | Missense | HM3 | Enhanced persintet current | (Chastan et al., 2016; Bertelli et al., 2019) |
| L1775P            | DIVS6 | Missense | DS  | NR                         | (Jiménez-Arredondo et al., 2017)              |
| V1776F            | DIVS6 | Missense | DS  | NR                         | (Ishii et al., 2017)                          |
| M1780T<br>De novo | DIVS6 | Missense | DS  | NR                         | (Nabbout et al., 2003)                        |
| Y1781H<br>De novo | DIVS6 | Missense | DS  | NR                         | (Depienne et al., 2008)                       |
| Y1771C            | DIVS6 | Missense | DS  | NR                         | (Fukuma et al., 2004)                         |
| I1782S            | DIVS6 | Missense | DS  | NR                         | (Depienne et al., 2008)                       |

|                   |            |                          |                               |                                                                                                                                |                                                                                                             |
|-------------------|------------|--------------------------|-------------------------------|--------------------------------------------------------------------------------------------------------------------------------|-------------------------------------------------------------------------------------------------------------|
| I1782M            | DIVS6      | Missense                 | DS<br>SME                     | Febrile and hemiclonic seizures                                                                                                | (Villeneuve et al., 2014)                                                                                   |
| A1783T<br>De novo | DIVS6      | Missense                 | DS<br>SME<br>DS               | Generalized tonic-clonic seizures<br>Myoclonic seizures<br>Complex partial seizures<br>Clonic seizures                         | (Sun et al., 2010; Klassen et al., 2011; Petrelli et al., 2012; Moehring et al., 2013; Lindy et al., 2018)  |
| A1783V<br>De novo | DIVS6      | Missense                 | DS<br><br>Epilepsy and/or NDD | Febril convulsions<br>Afebril convulsions<br>Myoclonic seizures<br>Parcial seizures<br>Generalized spikes-wave and focal (EEG) | (Marini et al., 2007; Klassen et al., 2011; Petrelli et al., 2012; Wang et al., 2012; Butler et al., 2017a) |
| I1785fsX11        | DIVS6      | Frameshift               | SME                           | NR                                                                                                                             | (Xu et al., 2014)                                                                                           |
| E1787K            | DIVS6      | Missense                 | DS                            | Febril convulsions<br>Generalized spikes-wave and multifocal (EEG)                                                             | (Marini et al., 2007)                                                                                       |
| E1787D            | DIVS6      | Missense                 | Ep and/or NDD                 | NR                                                                                                                             | (Lindy et al., 2018)                                                                                        |
| N1788fsX1796      | C-terminal | Frameshift               | DS                            | NR                                                                                                                             | (Wallace et al., 2003)                                                                                      |
| N1788K(;)H939P    | C-terminal | Missense<br><br>Compound | DS                            | NR                                                                                                                             | (Depienne et al., 2008)                                                                                     |

|                   |            |            |                                         |                                    |                        |
|-------------------|------------|------------|-----------------------------------------|------------------------------------|------------------------|
| F1789LfsX<br>5    | C-terminal | Frameshift | DS                                      | NR                                 | (Marini et al., 2007)  |
| A1792T<br>De novo | C-terminal | Missense   | DS                                      | NR                                 | (Wang et al., 2012)    |
| A1792D            | C-terminal | Missense   | Ep and/or<br>NDD                        | NR                                 | (Lindy et al., 2018)   |
| E1795Q            | C-terminal | Missense   | Ep and/or<br>NDD                        | NR                                 | (Lindy et al., 2018)   |
| E1795G<br>De novo | C-terminal | Missense   | Epilepsy                                | NR                                 | (Staněk et al., 2018)  |
| A1797P            | C-terminal | Missense   | Tonic-<br>clonic +<br>focal<br>seizures | Tonic-clonic and focal<br>seizures | (Butler et al., 2017a) |
| A1797EfsX<br>4    | C-terminal | Frameshift | DS                                      | NR                                 | (Cho et al., 2018)     |
| S1801RfsX<br>56   | C-terminal | Frameshift | Ep and/or<br>NDD                        | NR                                 | (Lindy et al., 2018)   |



|                   |            |                      |                                  |                                                                                                            |                                                             |
|-------------------|------------|----------------------|----------------------------------|------------------------------------------------------------------------------------------------------------|-------------------------------------------------------------|
| E1802X            | C-terminal | Nonsense             | DS                               | NR                                                                                                         | (Xu et al., 2015)                                           |
| F1805X<br>De novo | C-terminal | Frameshift           | DS                               | NR                                                                                                         | (Nabbout et al., 2003)                                      |
| E1806X            | C-terminal | Nonsense             | Ep and/or<br>NDD                 | NR                                                                                                         | (Lindy et al., 2018)                                        |
| 1807delMF<br>YE   | C-terminal | In-frame<br>deletion | DS                               | Generalized tonic clonic<br>seizures                                                                       | (Fujiwara, 2003)                                            |
| F1808L            | C-terminal | Missense             | ICEGTC                           | Reduced current density<br>Shift steady state<br>activation and<br>inactivation to more<br>negative values | (Fujiwara, 2003; Rhodes et al.,<br>2005)                    |
| F1808I<br>De novo | C-terminal | Missense             | SME                              | NR                                                                                                         | (Depienne et al., 2008)                                     |
| W1812G<br>De novo | C-terminal | Missense             | DS<br><br>Epilepsy<br>and/or NDD | Generalized tonic clonic<br>seizures<br><br>Multifocal spikes<br>(EEG)                                     | (Fujiwara, 2003; Skjei et al.,<br>2015; Lindy et al., 2018) |
| W1812R            | C-terminal | Missense             | Ep and/or<br>NDD                 | NR                                                                                                         | (Lindy et al., 2018)                                        |

|                                           |            |                      |       |                                                                                                                   |                                       |
|-------------------------------------------|------------|----------------------|-------|-------------------------------------------------------------------------------------------------------------------|---------------------------------------|
| W1812S<br>De novo                         | C-terminal | Missense             | DS    | NR                                                                                                                | (Depienne et al., 2008)               |
| W1812X<br>De novo                         | C-terminal | Nonsense             | GEFS+ | NR                                                                                                                | (Cetica et al., 2017)                 |
| W1812C (;)<br>1813–<br>1815EFK<br>De novo | C-terminal | In-frame<br>deletion | DS    | NR                                                                                                                | (Nabbout et al., 2003)                |
| E1813_F18<br>15del<br>De novo             | C-terminal | In-frame<br>deletion | SME   | NR                                                                                                                | (Depienne et al., 2008)               |
| Q1815K<br>De novo                         | C-terminal | Missense             | EE    | Febrile and afebrile<br>seizures<br>Generalized tonic clonic<br>seizures<br>Generalized spikes and<br>waves (EEG) | (Mercimek-Mahmutoglu et al.,<br>2015) |
| A1819S                                    | C-terminal | Missense             | GEFS+ | NR                                                                                                                | (Cetica et al., 2017)                 |
| Q1821X<br>De novo                         | C-terminal | Nonsense             | SME   | NR                                                                                                                | (Djémié et al., 2016)                 |
| M1823R<br><br>(De novo)                   | C-terminal | Missense             | DS    | NR                                                                                                                | (Ishii et al., 2017)                  |

|                    |            |                   |                                               |                                                                                                                 |                                                              |
|--------------------|------------|-------------------|-----------------------------------------------|-----------------------------------------------------------------------------------------------------------------|--------------------------------------------------------------|
| E1824X             | C-terminal | Nonsense          | SME                                           | NR                                                                                                              | (Xu et al., 2014)                                            |
| L1828S             | C-terminal | Missense          | Neurodevelopmental disorder, epilepsy-related | NR                                                                                                              | (Stosser et al., 2018)                                       |
| Q1830X<br>De novo  | C-terminal | Nonsense          | DS                                            | NR                                                                                                              | (Zuberi et al., 2011)                                        |
| F1831S<br>De novo  | C-terminal | Missense          | DS                                            | Generalized tonic clonic seizures<br>Ataxia<br><br>Severe mental decline<br><br>Small current density reduction | (Sugawara et al., 2002; Fujiwara, 2003; Le Gal et al., 2014) |
| F1831Lfx2<br>7     | C-terminal | Frameshift        | DS                                            | NR                                                                                                              | (Depienne et al., 2008)                                      |
| A1832P             | C-terminal | Missense          | DS                                            | NR                                                                                                              | (Zuberi et al., 2011)                                        |
| L1835F<br>De novo  | C-terminal | Missense          | DS                                            | NR                                                                                                              | (Depienne et al., 2008)                                      |
| L1835_P18<br>37del | C-terminal | In-frame deletion | Ep and/or NDD                                 | NR                                                                                                              | (Lindy et al., 2018)                                         |

|                             |            |            |            |                                                                    |                                                                                                                                                                                     |
|-----------------------------|------------|------------|------------|--------------------------------------------------------------------|-------------------------------------------------------------------------------------------------------------------------------------------------------------------------------------|
| E1836GfsX<br>25             | C-terminal | Frameshift | DS         | NR                                                                 | (Depienne et al., 2008)                                                                                                                                                             |
| Q1837X                      | C-terminal | Nonsense   | DS         | NR                                                                 | (Wang et al., 2012)                                                                                                                                                                 |
| L1839V                      | C-terminal | Missense   | SME        | NR                                                                 | (Xu et al., 2014)                                                                                                                                                                   |
| L1839P<br>De novo           | C-terminal | Missense   | DS         | Generalized tonic-clonic seizures<br>Hemiclonic and focal seizures | (Wu et al., 2015)                                                                                                                                                                   |
| L1841P                      | C-terminal | Missense   | DS         | Focal seizures                                                     | (Kumar et al., 2018)                                                                                                                                                                |
| M1845Hfs<br>X5              | C-terminal | Frameshift | DS         | NR                                                                 | (Ko et al., 2018)                                                                                                                                                                   |
| K1846S.fsX<br>11<br>De novo | C-terminal | Frameshift | DS<br>SMEB | Generalized tonic clonic seizures                                  | (Wallace et al., 2003; Margherita Mancardi et al., 2006; Zucca et al., 2008; Nicita et al., 2010; Sun et al., 2010; Petrelli et al., 2012; Lee et al., 2014; Haginoya et al., 2018) |
| K1846X                      | C-terminal | Nonsense   | DS         | NR                                                                 | (Sun et al., 2010)                                                                                                                                                                  |
| Q1848X                      | C-terminal | Nonsense   | DS         | NR                                                                 | (Ishii et al., 2017)                                                                                                                                                                |

|                   |            |            |                                   |                                                             |                         |
|-------------------|------------|------------|-----------------------------------|-------------------------------------------------------------|-------------------------|
| M1852K            | C-terminal | Missense   | DS                                | NR                                                          | (Zuberi et al., 2011)   |
| M1852T            | C-terminal | Missense   | DS<br>GEFS+                       | Reduced current density                                     | (Xu et al., 2015)       |
| M1852IfsX<br>9    | C-terminal | Frameshift | Intractable<br>Epilepsy           | NR                                                          | (Wang et al., 2012)     |
| P1855S            | C-terminal | Missense   | Epilepsy                          | NR                                                          | (Butler et al., 2017a)  |
| P1855L<br>De novo | C-terminal | Missense   | DS                                | NR                                                          | (Zuberi et al., 2011)   |
| M1856T            | C-terminal | Missense   | FS+<br><br>Epilepsy<br>and/or NDD | NR                                                          | (Lindy et al., 2018)    |
| M1856K            | C-terminal | Missense   | Ep and/or<br>NDD                  | NR                                                          | (Lindy et al., 2018)    |
| V1857L            | C-terminal | Missense   | GEFS+                             | Febrile seizures<br>Generalized tonic-<br>clonic convulsion | (Nagao et al., 2005)    |
| G1859Wfs<br>X2    | C-terminal | Frameshift | DS                                | NR                                                          | (Depienne et al., 2008) |

|                            |            |            |                      |                                                                                        |                         |
|----------------------------|------------|------------|----------------------|----------------------------------------------------------------------------------------|-------------------------|
| R1861W                     | C-terminal | Missense   | Intractable Epilepsy | NR                                                                                     | (Wang et al., 2012)     |
| R1861P                     | C-terminal | Missense   | Ep and/or NDD        | NR                                                                                     | (Lindy et al., 2018)    |
| D1866Y                     | C-terminal | Missense   | GEFS+                | Shift steady state inactivation to more positive values<br>Enhanced persistent current | (Spampanato, 2004)      |
| D1866G<br><br>(De novo)    | C-terminal | Missense   | DS                   | NR                                                                                     | (Ishii et al., 2017)    |
| I1867NfsX7<br>8            | C-terminal | Frameshift | DS                   | NR                                                                                     | (Depienne et al., 2008) |
| I1867T                     | C-terminal | Missense   | GEFS+                | Generalized tonic-clonic seizures                                                      | (Hindocha et al., 2008) |
| I1867TfsX1<br>0<br>De novo | C-terminal | Frameshift | DS                   | NR                                                                                     | (Depienne et al., 2008) |
| T1872fsX                   | C-terminal | Frameshift | DS                   | Secondary generalized tonic-clonic seizures<br>Focal tonic seizures                    | (Rilstone et al., 2012) |

|                       |            |            |                              |                                                                                                                         |                                            |
|-----------------------|------------|------------|------------------------------|-------------------------------------------------------------------------------------------------------------------------|--------------------------------------------|
| L1876P                | C-terminal | Missense   | DS<br>Epilepsy<br>and/or NDD | NR                                                                                                                      | (Lindy et al., 2018)                       |
| D1876X                | C-terminal | Frameshift | DS                           | NR                                                                                                                      | (Zuberi et al., 2011)                      |
| G1877V                | C-terminal | Missense   | GEFS+                        | Febrile convulsions<br>with non-febrile<br>seizures<br>Psychomotor delay<br>Generalize tonic<br>clonic/complex seizures | (Kim and Lee, 2017)                        |
| S1879fsX31<br>De novo | C-terminal | Frameshift | SME                          | Febrile seizures<br>Generalized tonic-<br>clonic seizures                                                               | (Verbeek et al., 2013)                     |
| G1880E                | C-terminal | Missense   | DS                           | NR                                                                                                                      | (Zuberi et al., 2011)                      |
| E1881K                | C-terminal | Missense   | DS                           | Focal seizures                                                                                                          | (Petrelli et al., 2012)                    |
| E1881X<br>De novo     | C-terminal | Nonsense   | DS<br>SMEB                   | Febrile and generalized<br>seizures                                                                                     | (Villeneuve et al., 2014)                  |
| E1881D<br>De novo     | C-terminal | Missense   | DS<br>SME                    | NR                                                                                                                      | (Wallace et al., 2003; Rodda et al., 2012) |

## Supplementary Material

|                             |            |            |          |                                                      |                                                                                  |
|-----------------------------|------------|------------|----------|------------------------------------------------------|----------------------------------------------------------------------------------|
| R1886X<br>De novo           | C-terminal | Nonsense   | DS       | Febrile and hemiclonic seizures                      | (Margherita Mancardi et al., 2006; Villeneuve et al., 2014; Djémié et al., 2016) |
| R1886fsX1<br>910<br>De novo | C-terminal | Frameshift | DS       | NR                                                   | (Nabbout et al., 2003)                                                           |
| R1886Q                      | C-terminal | Missense   | SME      | Generalized tonic-clonic seizures<br>Atypic absences | (Moehring et al., 2013)                                                          |
| E1890fsX1<br>910<br>De novo | C-terminal | Frameshift | DS       | NR                                                   | (Nabbout et al., 2003)                                                           |
| F1893AfsX<br>53             | C-terminal | Frameshift | DS       | Febrile and generalized seizures                     | (Villeneuve et al., 2014)                                                        |
| R1892X<br>De novo           | C-terminal | Nonsense   | DS       | Reduced current density                              | (Sugawara et al., 2002; Nicita et al., 2010)                                     |
| R1892G                      | C-terminal | Missense   | Epilepsy | NR                                                   | (Afawi et al., 2016)                                                             |
| P1894L<br>De novo           | C-terminal | Missense   | EP+ASD   | NR                                                   | (O’Roak et al., 2011)                                                            |



|                            |            |                   |                               |                                                                                          |                         |
|----------------------------|------------|-------------------|-------------------------------|------------------------------------------------------------------------------------------|-------------------------|
| P1898LfsX<br>13<br>De novo | C-terminal | Frameshift        | DS                            | Febrile and myoclonic seizures<br>Secondary generalized tonic-clonic seizures            | (Zhou et al., 2018)     |
| Q1904X                     | C-terminal | Nonsense          | DS<br><br>Epilepsy and/or NDD | NR                                                                                       | (Lindy et al., 2018)    |
| Q1904fsX4<br>2             | C-terminal | Frameshift        | DS                            | NR                                                                                       | (Sugawara et al., 2002) |
| T1907fsX4                  | C-terminal | Frameshift        | SME                           | NR                                                                                       | (Xu et al., 2014)       |
| T1909I                     | C-terminal | Missense          | DS                            | Reduced current density<br>Enhanced persistent current                                   | (Ohmori et al., 2006)   |
| T1909del<br>De novo        | C-terminal | In-frame deletion | DS                            | NR                                                                                       | (Zuberi et al., 2011)   |
| R1912KfsX<br>32<br>De novo | C-terminal | Frameshift        | DS                            | NR                                                                                       | (Zuberi et al., 2011)   |
| R1912X<br>De novo          | C-terminal | Nonsense          | DS                            | Generalized tonic-clonic seizures<br>Absence, myoclonic, partial and hemiclonic seizures | (Ozmen et al., 2011)    |

|                             |            |                      |                                     |                                                                                                          |                           |
|-----------------------------|------------|----------------------|-------------------------------------|----------------------------------------------------------------------------------------------------------|---------------------------|
| K1913X                      | C-terminal | Nonsense             | Ep and/or<br>NDD                    | NR                                                                                                       | (Lindy et al., 2018)      |
| p.1914_1914del<br>De novo   | C-terminal | In-frame<br>deletion | DS                                  | Febrile seizures<br>Myoclonic seizures<br>Focal to bilateral tonic-clonic<br>Multifocal discharges (EEG) | (Liu et al., 2018)        |
| Q1914del<br>De novo         | C-terminal | In-frame<br>deletion | Pediatric<br>refractory<br>epilepsy | NR                                                                                                       | (Liu et al., 2018)        |
| Q1914RfsX<br>30<br>De novo  | C-terminal | Frameshift           | ICEGTC                              | NR                                                                                                       | (Harkin et al., 2007)     |
| E1915X                      | C-terminal | Frameshift           | DS                                  | Febrile and hemiclonic<br>seizures                                                                       | (Villeneuve et al., 2014) |
| E1915K                      | C-terminal | Missense             | Ep and/or<br>NDD                    | NR                                                                                                       | (Lindy et al., 2018)      |
| E1915G.fsX<br>28<br>De novo | C-terminal | Frameshift           | DS                                  | NR                                                                                                       | (Ream and Mikati, 2014)   |
| E1916KfsX<br>16             | C-terminal | Frameshift           | Ep and/or<br>NDD                    | NR                                                                                                       | (Lindy et al., 2018)      |

|                                       |            |            |                  |                                                                                                                             |                                                                |
|---------------------------------------|------------|------------|------------------|-----------------------------------------------------------------------------------------------------------------------------|----------------------------------------------------------------|
| E1916X                                | C-terminal | Nonsense   | Ep and/or<br>NDD | NR                                                                                                                          | (Lindy et al., 2018)                                           |
| S1918F                                | C-terminal | Missense   | Ep and/or<br>NDD | NR                                                                                                                          | (Lindy et al., 2018)                                           |
| I1922T                                | C-terminal | Missense   | DS               | NR                                                                                                                          | (Harkin et al., 2007; Mulley et al., 2013; Lindy et al., 2018) |
| Q1923R                                | C-terminal | Missense   | PEFS+            | Secondarily generalized tonic-clonic and complex partial seizures<br><br>Focal spike-waves and generalized spike-wave (EEG) | (Shi et al., 2012)                                             |
| R1924LfsX<br>8<br>De novo             | C-terminal | Frameshift | DS               | NR                                                                                                                          | (Djémié et al., 2016)                                          |
| A1925T                                | C-terminal | Missense   | FS+              | NR                                                                                                                          | (Møller et al., 2016)                                          |
| Y1926X                                | C-terminal | Nonsense   | DS               | NR                                                                                                                          | (Zuberi et al., 2011)                                          |
| R1927delin<br>sIle,Ile,Gln<br>De novo | C-terminal | Frameshift | DS               | NR                                                                                                                          | (Zuberi et al., 2011)                                          |
| R1927T                                | C-terminal | Missense   | DS               | NR                                                                                                                          | (Xu et al., 2015)                                              |

|                           |            |                                      |                                  |                                                                                                                         |                                                     |
|---------------------------|------------|--------------------------------------|----------------------------------|-------------------------------------------------------------------------------------------------------------------------|-----------------------------------------------------|
| R1928G                    | C-terminal | Missense                             | DS                               | NR                                                                                                                      | (Zucca et al., 2008)                                |
| L1930FfsX<br>2<br>De novo | C-terminal | Frameshift                           | SMEB                             | NR                                                                                                                      | (Zuberi et al., 2011)                               |
| K1936E                    | C-terminal | Missense                             | Ep and/or<br>NDD                 | NR                                                                                                                      | (Lindy et al., 2018)                                |
| A1951S                    | C-terminal | Missense                             | DS                               | NR                                                                                                                      | (Cetica et al., 2017)                               |
| E1957G                    | C-terminal | Missense                             | Infantile<br>spasms<br>DS        | NR                                                                                                                      | (Wallace et al., 2003;<br>Cherepanova et al., 2013) |
| M1977L                    | C-terminal | Missense                             | GEFS+                            | Generalized<br>convulsions<br>Afebrile seizures<br>Bilateral frontal spike-<br>waves (EEG)                              | (Saitoh et al., 2012)                               |
| R1988W                    | C-terminal | Missense                             | Epilepsy-<br>aphasia with<br>FS+ | NR                                                                                                                      | (Carvill et al., 2013)                              |
| del SCN1A<br><br>De novo  | 5'UTR      | Partial gene<br>deletion<br>(73.8Kb) | DS                               | Generalized tonic clonic<br>seizures<br>Myoclonic seizures<br>Atypical absences<br>Focal seizures<br>Status epilepticus | (Nakayama et al., 2010)                             |

|                      |            |                                        |           |                                                                                                               |                          |
|----------------------|------------|----------------------------------------|-----------|---------------------------------------------------------------------------------------------------------------|--------------------------|
| del SCN1A,7A,9A      | 5'UTR      | Partial gene deletion                  | SMEB      | Generalized tonic clonic seizures<br>Focal seizures<br>Status epilepticus<br>Secondary generalization         | (Nakayama et al., 2010)  |
| del SCN1A            | N-terminal | Partial gene deletion                  | DS        | NR                                                                                                            | (Zuberi et al., 2011)    |
| del SCN1A            | Chromosome | Partial gene deletion<br>(Exon 12-14)  | DS        | Febrile convulsions<br>Absence seizures<br>Multifocal spike-waves (EEG)                                       | (Altarescu et al., 2012) |
| del SCN1A            | Chromosome | Partial gene deletion<br>(Exon 1 a 20) | SMEB      | NR                                                                                                            | (Lim et al., 2011)       |
| del SCN1A            | Chromosome | Whole gene deletion<br>(0.2 Mb)        | DS        | Tonic-clonic seizure<br>Hemiclonic seizure                                                                    | (Lim et al., 2015)       |
| del SCN1A            | Chromosome | Partial gene deletion<br>(Exons 2-4)   | DS<br>FS+ | Febrile seizures<br>Febrile seizures plus<br>Generalized clonic seizures<br>Generalized tonic-clonic seizures | Guerrini R.2010          |
| del SCN1A            | Chromosome | Partial gene deletion<br>(Exons 2-16)  | SFE       | Focal seizures<br>Status epilepticus<br>Secondary generalization                                              | (Nakayama et al., 2010)  |
| del SCN1A<br>De novo | Chromosome | Partial gene deletion<br>(exon 8-26)   | DS        | NR                                                                                                            | (Wang et al., 2008)      |

|           |                      |                                           |     |                                                                                     |                               |
|-----------|----------------------|-------------------------------------------|-----|-------------------------------------------------------------------------------------|-------------------------------|
|           |                      |                                           |     |                                                                                     |                               |
| del SCN1A | Chromosome           | Partial gene deletion<br>(Exons 7 - 9)    | DS  | NR                                                                                  | (Depienne et al., 2008)       |
| del SCN1A | Chromosome           | Partial gene deletion<br>(Exon 9)         | DS  | NR                                                                                  | (Depienne et al., 2008)       |
| del SCN1A | Chromosome           | Partial gene deletion<br>(Exons 14 – 20)  | DS  | NR                                                                                  | (Depienne et al., 2008)       |
| del SCN1A | Chromosome           | Partial gene deletion<br>(Exons 22 - 26)  | DS  | NR                                                                                  | (Depienne et al., 2008)       |
| del SCN1A | Chromosome           | Partial gene deletion<br>(Exons 24)       | DS  | NR                                                                                  | (Depienne et al., 2008)       |
| dup SCN1A | Chromosome           | Partial gene duplication<br>(Exons 2- 21) | DS  | NR                                                                                  | (Depienne et al., 2008)       |
| del SCN1A | Chromosome<br>DI-DII | Partial gene deletion                     | SME | NR                                                                                  | <u>(Hattori et al., 2008)</u> |
| del SCN1A | Chromosome           | Partial gene deletion                     | DS  | Generalized tonic–<br>clonic seizures<br>Absence, myoclonic<br>and partial seizures | <u>(Ekici et al., 2011)</u>   |

|                      |            |                                              |      |                                                                                                                                                    |                         |
|----------------------|------------|----------------------------------------------|------|----------------------------------------------------------------------------------------------------------------------------------------------------|-------------------------|
| del<br>De novo       | Chromosome | Partial gene deletion<br>(exons 3 and 17–26) | DS   | Tonic clonic seizures<br>Myoclonic seizures<br>Atypical absences<br>Focal seizures<br>Status epilepticus<br>Seizures provoked by fever             | (Nakayama et al., 2010) |
| del SCN1A            | Chromosome | Partial gene deletion<br>(Exons 17-20)       | DS   | Focal myoclonus seizures<br>Generalized tonic–clonic seizures                                                                                      | (Skjei et al., 2015)    |
| del SCN1A<br>De novo | Chromosome | Partial gene deletion<br>(Exons 14–16)       | DS   | Generalized tonic clonic seizures<br>Myoclonic seizures<br>Atypical absences<br>Focal seizures<br>Status epilepticus<br>Seizures provoked by fever | (Nakayama et al., 2010) |
| del SCN1A            | Chromosome | Partial gene deletion<br>(Exon 20)           | SMEB | Generalized tonicclonic seizures<br>Focal seizures<br>Status epilepticus<br>Secondary generalization                                               | (Nakayama et al., 2010) |
| del SCN1A<br>De novo | Chromosome | Partial gene deletion<br>(Exons 17-26)       | DS   | NR                                                                                                                                                 | (Wang et al., 2008)     |
| del SCN1A<br>De novo | Chromosome | Partial gene deletion<br>(Exons 20-26)       | DS   | NR                                                                                                                                                 | (Wang et al., 2008)     |

|                      |            |                                   |       |                                                                              |                      |
|----------------------|------------|-----------------------------------|-------|------------------------------------------------------------------------------|----------------------|
| del SCN1A<br>De novo | Chromosome | Partial gene deletion             | DS    | NR                                                                           | (Sun et al., 2010)   |
| del SCN1A<br>De novo | Chromosome | Whole gene deletion<br>(607 kb)   | DS    | Febrile and afebrile myoclonic seizures<br>Generalized spike-waves (EEG)     | (Madia et al., 2006) |
| del SCN1A            | Chromosome | Whole gene deletion<br>(0.750 Mb) | DS    | NR                                                                           | (Wang et al., 2008)  |
| del SCN1A            | Chromosome | Whole gene deletion<br>(1.139 Mb) | DS    | NR                                                                           | (Wang et al., 2008)  |
| del SCN1A<br>De novo | Chromosome | Whole gene deletion<br>(1.277 Mb) | DS    | NR                                                                           | (Wang et al., 2008)  |
| del SCN1A            | Chromosome | Whole gene deletion<br>(1.5 Mb)   | MMPSI | Focal clonic seizure                                                         | (Lim et al., 2015)   |
| del SCN1A            | Chromosome | Whole gene deletion<br>(1.549 Mb) | DS    | NR                                                                           | (Wang et al., 2008)  |
| del SCN1A<br>De novo | Chromosome | Whole gene deletion<br>(3.1 Mb)   | DS    | Unilateral febrile clonic seizure<br>Febrile and afebrile myoclonic seizures | (Madia et al., 2006) |



|                                                                |            |                                                                       |                       |                                                                                                                                                                                                                                          |                         |
|----------------------------------------------------------------|------------|-----------------------------------------------------------------------|-----------------------|------------------------------------------------------------------------------------------------------------------------------------------------------------------------------------------------------------------------------------------|-------------------------|
|                                                                |            |                                                                       |                       | Generalized spike-waves (EEG)                                                                                                                                                                                                            |                         |
| del SCN1A<br>De novo                                           | Chromosome | Whole gene deletion<br>(4 Mb)                                         | DS                    | Myoclonic seizure<br>Light sensitivity                                                                                                                                                                                                   | (Suls et al., 2006)     |
| del SCN1A<br>De novo                                           | Chromosome | Whole gene deletion<br>(4.5 Mb)                                       | DS                    | Generalized tonic-clonic seizure                                                                                                                                                                                                         | (Suls et al., 2006)     |
| del SCN1A<br>De novo                                           | Chromosome | Whole gene deletion<br>(4.7 Mb)                                       | DS                    | Myoclonic or hemiclonic seizures<br>Generalized spike-waves (EEG)                                                                                                                                                                        | (Madia et al., 2006)    |
| del SCN1A                                                      | Chromosome | Whole gene deletion<br>(5 Mb)                                         | DS and Leigh syndrome | Generalized tonic-clonic seizure                                                                                                                                                                                                         | (Suls et al., 2006)     |
| Del SCN1A,<br>SCN2A,<br>SCN1A,<br>SCN3A,<br>SCN9A and<br>SCN7A | Chromosome | Deletion<br>(10.29 - 10.58 Mb)<br><br>(De novo interstitial deletion) | Severe epilepsy       | Focal and generalized seizures<br><br>Lack of eye contact<br><br>Stereotypic and repetitive hand movements<br><br>Slow background with high amplitude delta waves mixed with spikes and sharp waves on the temporo-occipital areas (EEG) | (Pescucci et al., 2007) |

|                                                         |            |                                      |                    |                                                                                                                                                                                  |                              |
|---------------------------------------------------------|------------|--------------------------------------|--------------------|----------------------------------------------------------------------------------------------------------------------------------------------------------------------------------|------------------------------|
| Del<br>SCN1A,<br>SCN2A,<br>SCN3A,<br>SCN7A and<br>SCN9A | Chromosome | Deletion<br>(10.4-Mb)                | Severe<br>epilepsy | Epileptic seizure with<br>pale, atonic periods<br>followed by a spas-<br>m-like out-throwing of<br>both arms<br><br>Predominantly right-<br>sided epileptiform<br>activity (EEG) | (Davidsson et al., 2008)     |
| del SCN1A<br>(De novo)                                  | Chromosome | Whole gene<br>deletion<br>(11.06 Mb) | MMPSI              | Multifocal seizures<br>Status epilepticus                                                                                                                                        | (Carranza Rojo et al., 2011) |
| del SCN1A,<br>9A,<br>ABCB11<br>and LRP2<br>(De novo)    | Chromosome | partial gene<br>deletion             | DS                 | NR                                                                                                                                                                               | (Ma et al., 2016)            |
| del SCN1A,<br>9A                                        | Chromosome | whole gene<br>deletion<br>(0.2 Mb)   | DS                 | Tonic-clonic seizure<br>Hemiclonic seizure                                                                                                                                       | (Lim et al., 2015)           |
| del SCN1A,<br>2A, 3A, 7A,<br>9A                         | Chromosome | partial gene<br>deletion<br>(8.4 Mb) | MMPSI              | Tonic—clonic seizure<br>Multifocal seizures                                                                                                                                      | (Lim et al., 2015)           |
| del SCN1A<br>De novo                                    | Chromosome | partial gene<br>deletion<br>(Exon 7) | DS                 | >10 seizures/month                                                                                                                                                               | (Do et al., 2017)            |
| del SCN1A,<br>2A, 3A, 7A,<br>9A                         | Chromosome | whole gene<br>deletion<br>(4.3 Mb)   | MMPSI              | Multifocal seizures<br>Hemiclonic seizure                                                                                                                                        | (Lim et al., 2015)           |

|                        |            |                                         |    |    |                            |
|------------------------|------------|-----------------------------------------|----|----|----------------------------|
| del SCN1A<br>(De novo) | Chromosome | partial gene deletion<br>(Exon 8 – 26)  | DS | NR | (Ishii et al., 2017)       |
| del SCN1A<br>(De novo) | Chromosome | partial gene deletion<br>(Exon 17 – 26) | DS | NR | (Ishii et al., 2017)       |
| del SCN1A<br>(De novo) | Chromosome | partial gene deletion<br>(Exon 20 – 26) | DS | NR | (Ishii et al., 2017)       |
| del SCN1A<br>(De novo) | Chromosome | partial gene deletion<br>(Exon 1)       | DS | NR | (Ishii et al., 2017)       |
| del SCN1A<br>De novo   | Chromosome | partial gene deletion<br>(Exon 5-8)     | DS | NR | (Esterhuizen et al., 2018) |
| del SCN1A<br>(De novo) | Chromosome | partial gene deletion<br>(Exon 2-3)     | DS | NR | (Ishii et al., 2017)       |
| del SCN1A<br>(De novo) | Chromosome | partial gene deletion<br>(Exon 1-26)    | DS | NR | (Ishii et al., 2017)       |
| del SCN1A<br>(De novo) | Chromosome | partial gene deletion<br>(Exon 7)       | DS | NR | (Ishii et al., 2017)       |
| del SCN1A              | Chromosome | partial gene deletion<br>(Exon 1 a 13)  | DS | NR | (Cetica et al., 2017)      |

|                          |            |                                          |          |                                                                                                                                        |                         |
|--------------------------|------------|------------------------------------------|----------|----------------------------------------------------------------------------------------------------------------------------------------|-------------------------|
| del SCN1A                | Chromosome | partial gene deletion<br>(Exon 2 a 4)    | DS<br>FS | NR                                                                                                                                     | (Cetica et al., 2017)   |
| del SCN1A                | Chromosome | partial gene deletion<br>(Exon 1 a 26)   | DS       | NR                                                                                                                                     | (Cetica et al., 2017)   |
| del SCN1A                | Chromosome | partial gene deletion<br>(Exon 17 e 18)  | DS       | NR                                                                                                                                     | (Cetica et al., 2017)   |
| del SCN1A                | Chromosome | partial gene deletion<br>(Exons 2-23)    | DS       | Generalized tonic clonic seizure<br>Focal, complex partial and tonic seizures                                                          | (de Lange et al., 2018) |
| dup SCN1A                | Chromosome | Partial gene duplication                 | SME      | NR                                                                                                                                     | (Xu et al., 2014)       |
| dup SCN1A                | Chromosome | Partial gene duplication<br>(Exons 2–16) | DS       | Tonic clonic seizures<br>Myoclonic seizures<br>Atypical absences<br>Focal seizures<br>Status epilepticus<br>Seizures provoked by fever | (Nakayama et al., 2010) |
| dup SCN1A<br><br>De novo | Chromosome | Partial gene duplication                 | DS       | NR                                                                                                                                     | (Sun et al., 2010)      |

|                      |            |                                            |                                         |                                                                              |                                                           |
|----------------------|------------|--------------------------------------------|-----------------------------------------|------------------------------------------------------------------------------|-----------------------------------------------------------|
| dup SCN1A            | Chromosome | Partial gene duplication                   | SME                                     | Generalized tonic clonic seizures                                            | (Petrelli et al., 2012)                                   |
| dup SCN1A<br>De novo | Chromosome | Partial gene duplication<br>(Exon 17 a 20) | DS                                      | Afebrile seizures<br>Generalized tonic clonic seizures                       | (Verbeek et al., 2013)                                    |
| Del SCN1A and SCN2A  | Chromosome | whole gene deletion                        | IEE                                     | NR                                                                           | (Kwong et al., 2015)                                      |
| dup SCN1A<br>De novo | Chromosome | Whole gene duplication                     | Neonatal seizure                        | Abnormal back- ground activities with spiky transients (EEG)                 | (Okumura et al., 2011)                                    |
| dup SCN1A<br>De novo | Chromosome | Whole gene duplication<br>(6.7 Mb)         | Epilepsy                                | Focal tonic seizures                                                         | (Goeggel Simonetti et al., 2012)                          |
| dup SCN1A<br>De novo | Chromosome | Whole gene duplication<br>(10.1 Mb)        | Epilepsy                                | Multifocal clonic seizures                                                   | (Goeggel Simonetti et al., 2012)                          |
| dup SCN1A            | Chromosome | Whole gene duplication                     | NIE                                     | Facial flushing<br>Focal tonic seizures<br>Generalized tonic clonic seizures | (Raymond et al., 2011;<br>Goeggel Simonetti et al., 2012) |
| dup SCN1A<br>De novo | Chromosome | Whole gene duplication<br>(11.19 Mb)       | Epilepsy with cognitive impairment /ASD | NR                                                                           | (Nicholl et al., 2013)                                    |

|                                     |            |                          |                                                            |                                                              |                       |
|-------------------------------------|------------|--------------------------|------------------------------------------------------------|--------------------------------------------------------------|-----------------------|
| dup SCN1A                           | Chromosome | Partial gene duplication | GEFS+                                                      | NR                                                           | (Cetica et al., 2017) |
| translocation<br>De novo            | Chromosome | t(2;5)(q24.3,q34)        | DS                                                         | Afebrile epileptic seizure<br>Generalized convulsive seizure | (Møller et al., 2008) |
| unbalanced translocation<br>De novo | Chromosome | t(2;15)                  | Epilepsy, apnoea, mental retardation & dysmorphic features | Epileptic seizures accompanied by severe central apnea       | (Langer et al., 2006) |

Epilepsy (Ep); Generalized epilepsy with febrile seizures plus (GEFS+); Febrile seizures (FS); Febrile seizures plus (FS+); Lennox-Gastaut syndrome (LGS); Dravet syndrome (DS); Epileptic encephalopathy (EE); Borderline severe myoclonic epilepsy (SMEB); Severe myoclonic epilepsy (SME); Familial hemiplegic migraine (FHM); Partial epilepsy with antecedent FS (PEFS+); neurodevelopmental disorders (NDD); Intractable childhood epilepsy with generalized tonic-clonic seizures (ICE-GTC); Malignant migrating partial seizures of infancy (MMPSI); Temporal lobe epilepsy (TLE); Mesial temporal sclerosis (MTS); Neonatal- infantile epilepsy (NIE); Symptomatic focal epilepsy (SFE); Autism spectrum disorders (ASD); Not Reported (NR); Electroencephalography (EEG); Magnetic resonance imaging (MRI).

Abou-Khalil, B., Ge, Q., Desai, R., Ryther, R., Bazyk, A., Bailey, R., et al. (2001). Partial and generalized epilepsy with febrile seizures plus and a novel SCN1A mutation. *Neurology* 57, 2265–2272. doi:10.1212/WNL.57.12.2265.

Afawi, Z., Oliver, K. L., Kivity, S., Mazarib, A., Blatt, I., Neufeld, M. Y., et al. (2016). Multiplex families with epilepsy: Success of clinical and molecular genetic characterization. *Neurology* 86, 713–722. doi:10.1212/WNL.0000000000002404.

Alekov, A. K., Masmudur Rahman, M. D., Mitrovic, N., Lehmann-Horn, F., and Lerche, H. (2001). Enhanced inactivation and acceleration of activation of the sodium channel associated with epilepsy in man. *Eur. J. Neurosci.* 13, 2171–2176. doi:10.1046/j.0953-816X.2001.01590.x.

Alekov, A. K., Rahman, M. M., Mitrovic, N., Lehmannhorn, F., and Lerche, H. (2000). A sodium channel mutation causing epilepsy in man exhibits subtle defects in fast inactivation and activation in vitro. *J. Physiol.* 529, 533–540. doi:10.1111/j.1469-7793.2000.00533.x.

Allen, A. S., Bellows, S. T., Berkovic, S. F., Bridgers, J., Burgess, R., Cavalleri, G., et al. (2017). Ultra-rare genetic variation in common epilepsies: a case-control sequencing study. *Lancet Neurol.* 16, 135–143. doi:10.1016/S1474-4422(16)30359-3.

- Allen, A. S., Berkovic, S. F., Cossette, P., Delanty, N., Dlugos, D., Eichler, E. E., et al. (2013). De novo mutations in epileptic encephalopathies. *Nature* 501, 217–221. doi:10.1038/nature12439.
- Allen, N. M., Conroy, J., Shahwan, A., Lynch, B., Correa, R. G., Pena, S. D. J., et al. (2016). Unexplained early onset epileptic encephalopathy: Exome screening and phenotype expansion. *Epilepsia* 57, e12–e17. doi:10.1111/epi.13250.
- Altarescu, G., Beerli, R., Eldar-Geva, T., Varshaver, I., Margalioth, E. J., Levy-Lahad, E., et al. (2012). PGD for germline mosaicism. *Reprod. Biomed. Online* 25, 390–395. doi:10.1016/j.rbmo.2012.07.003.
- Annesi, G., Gambardella, A., Carrideo, S., Incorpora, G., Labate, A., Pasqua, A. A., et al. (2003). Two Novel SCN1A Missense Mutations in Generalized Epilepsy with Febrile Seizures Plus. *Epilepsia* 44, 1257–1258. doi:10.1046/j.1528-1157.2003.22503.x.
- Arafat, A., Jing, P., Ma, Y., Pu, M., Nan, G., Fang, H., et al. (2017). Unexplained Early Infantile Epileptic Encephalopathy in Han Chinese Children: Next-Generation Sequencing and Phenotype Enriching. *Sci. Rep.* 7, 46227. doi:10.1038/srep46227.
- Arlier, Z., Bayri, Y., Kolb, L. E., Erturk, O., Ozturk, A. K., Bayrakli, F., et al. (2010). Four novel SCN1A mutations in turkish patients with severe myoclonic epilepsy of infancy (SMEI). *J. Child Neurol.* 25, 1265–1268. doi:10.1177/0883073809357241.
- Azmanov, D. N., Zhelyazkova, S., Dimova, P. S., Radionova, M., Bojinova, V., Florez, L., et al. (2010). Mosaicism of a missense SCN1A mutation and Dravet syndrome in a Roma/Gypsy family. *Epileptic Disord.* 12, 117–124. doi:10.1684/epd.2010.0311.
- Barba, C., Parrini, E., Coras, R., Galuppi, A., Craiu, D., Kluger, G., et al. (2014). Co-occurring malformations of cortical development and SCN1A gene mutations. *Epilepsia* 55, 1009–1019. doi:10.1111/epi.12658.
- Barela, A. J., Waddy, S. P., Lickfett, J. G., Hunter, J., Anido, A., Helmers, S. L., et al. (2006). An epilepsy mutation in the sodium channel SCN1A that decreases channel excitability. *J. Neurosci.* 26, 2714–2723. doi:10.1523/JNEUROSCI.2977-05.2006.
- Barros, J., Ferreira, A., Brandão, A. F., Lemos, C., Correia, F., Damásio, J., et al. (2014). Familial hemiplegic migraine due to L263V SCN1A mutation: Discordance for epilepsy between two kindreds from Douro Valley. *Cephalalgia* 34, 1015–1020. doi:10.1177/0333102414527015.
- Bechi, G., Rusconi, R., Cestè, S., Striano, P., Franceschetti, S., and Mantegazza, M. (2015). Rescuable folding defective NaV1.1 (SCN1A) mutants in epilepsy: Properties, occurrence, and novel rescuing strategy with peptides targeted to the endoplasmic reticulum. *Neurobiol. Dis.* 75, 100–114. doi:10.1016/j.nbd.2014.12.028.
- Bennett, C. A., Petrovski, S., Oliver, K. L., and Berkovic, S. F. (2017). ExACTly zero or once. *Neurol. Genet.* 3, e163. doi:10.1212/NXG.0000000000000163.
- Bertelli, S., Barbieri, R., Pusch, M., and Gavazzo, P. (2019). Gain of function of sporadic/familial hemiplegic migraine-causing SCN1A mutations: Use of an optimized cDNA. *Cephalalgia* 39, 477–488. doi:10.1177/0333102418788336.

- Binini, N., Sancini, G., Villa, C., Dal Magro, R., Sansoni, V., Rusconi, R., et al. (2017). Identification of two mutations in cis in the SCN1A gene in a family showing genetic epilepsy with febrile seizures plus (GEFS+) and idiopathic generalized epilepsy (IGE). *Brain Res.* 1677, 26–32. doi:10.1016/j.brainres.2017.09.023.
- Brunklaus, A., Ellis, R., Stewart, H., Aylett, S., Reavey, E., Jefferson, R., et al. (2015). Homozygous mutations in the SCN1A gene associated with genetic epilepsy with febrile seizures plus and Dravet syndrome in 2 families. *Eur. J. Paediatr. Neurol.* 19, 484–488. doi:10.1016/j.ejpn.2015.02.001.
- Buoni, S., Orrico, A., Galli, L., Zannolli, R., Burrioni, L., Hayek, J., et al. (2006). SCN1A (2528delG) novel truncating mutation with benign outcome of severe myoclonic epilepsy of infancy. *Neurology* 66, 606–607. doi:10.1212/01.WNL.0000198504.41315.B1.
- Butler, K. M., da Silva, C., Alexander, J. J., Hegde, M., and Escayg, A. (2017a). Diagnostic Yield From 339 Epilepsy Patients Screened on a Clinical Gene Panel. *Pediatr. Neurol.* 77, 61–66. doi:10.1016/j.pediatrneurol.2017.09.003.
- Butler, K. M., da Silva, C., Shafir, Y., Weisfeld-Adams, J. D., Alexander, J. J., Hegde, M., et al. (2017b). De novo and inherited SCN8A epilepsy mutations detected by gene panel analysis. *Epilepsy Res.* 129, 17–25. doi:10.1016/j.eplepsyres.2016.11.002.
- Cantarín Extremera, V., García Peñas, J. J., González Gutiérrez-Solana, L., García Fernández, M., Ruiz-Falcó Rojas, M. L., Duat Rodríguez, A., et al. (2011). Características clínicas, electroencefalográficas y genómicas de los pacientes con epilepsia con crisis febriles plus. *Rev. Neurol.* 52, 404. doi:10.33588/rn.5207.2010693.
- Carranza Rojo, D., Hamiwka, L., McMahon, J. M., Dibbens, L. M., Arsov, T., Suls, A., et al. (2011). De novo SCN1A mutations in migrating partial seizures of infancy. *Neurology* 77, 380–383. doi:10.1212/WNL.0b013e318227046d.
- Carvill, G. L., Heavin, S. B., Yendle, S. C., McMahon, J. M., O’Roak, B. J., Cook, J., et al. (2013). Targeted resequencing in epileptic encephalopathies identifies de novo mutations in CHD2 and SYNGAP1. *Nat. Genet.* 45, 825–830. doi:10.1038/ng.2646.
- Carvill, G. L., Weckhuysen, S., McMahon, J. M., Hartmann, C., Moller, R. S., Hjalgrim, H., et al. (2014). GABRA1 and STXBP1: Novel genetic causes of Dravet syndrome. *Neurology* 82, 1245–1253. doi:10.1212/WNL.0000000000000291.
- Castro, M.-J., Stam, A., Lemos, C., de Vries, B., Vanmolkot, K., Barros, J., et al. (2009). First Mutation in the Voltage-Gated Na<sup>v</sup> 1.1 Subunit Gene SCN1A with Co-Occurring Familial Hemiplegic Migraine and Epilepsy. *Cephalalgia* 29, 308–313. doi:10.1111/j.1468-2982.2008.01721.x.
- Catarino, C. B., Liu, J. Y. W., Liagkouras, I., Gibbons, V. S., Labrum, R. W., Ellis, R., et al. (2011). Dravet syndrome as epileptic encephalopathy: evidence from long-term course and neuropathology. *Brain* 134, 2982–3010. doi:10.1093/brain/awr129.
- Cestèle, S., Labate, A., Rusconi, R., Tarantino, P., Mumoli, L., Franceschetti, S., et al. (2013).



Divergent effects of the T1174S SCN1A mutation associated with seizures and hemiplegic migraine. *Epilepsia* 54, 927–935. doi:10.1111/epi.12123.

- Cetica, V., Chiari, S., Mei, D., Parrini, E., Grisotto, L., Marini, C., et al. (2017). Clinical and genetic factors predicting Dravet syndrome in infants with SCN1A mutations. *Neurology* 88, 1037–1044. doi:10.1212/WNL.0000000000003716.
- Ceulemans, B. P. G. M., Claes, L. R. F., and Lagae, L. G. (2004). Clinical correlations of mutations in the SCN1A gene: from febrile seizures to severe myoclonic epilepsy in infancy. *Pediatr. Neurol.* 30, 236–243. doi:10.1016/j.pediatrneurol.2003.10.012.
- Chastan, N., Lebas, A., Legoff, F., Parain, D., and Guyant-Marechal, L. (2016). Clinical and electroencephalographic abnormalities during the full duration of a sporadic hemiplegic migraine attack. *Neurophysiol. Clin. Neurophysiol.* 46, 307–311. doi:10.1016/j.neucli.2016.03.004.
- Cherepanova, N. S., Leslie, E., Ferguson, P. J., Bamshad, M. J., and Bassuk, A. G. (2013). Presence of Epilepsy-Associated Variants in Large Exome Databases. *J. Neurogenet.* 27, 1–4. doi:10.3109/01677063.2013.772176.
- Cho, M. J., Kwon, S. S., Ko, A., Lee, S.-T., Lee, Y. M., Kim, H. D., et al. (2018). Efficacy of Stiripentol in Dravet Syndrome with or without SCN1A Mutations. *J. Clin. Neurol.* 14, 22. doi:10.3988/jcn.2018.14.1.22.
- Choi, K. D., Kim, J. S., Kim, H. J., Jung, I., Jeong, S. H., Lee, S. H., et al. (2017). Genetic Variants Associated with Episodic Ataxia in Korea. *Sci. Rep.* 7, 13855. doi:10.1038/s41598-017-14254-7.
- Claes, L., Ceulemans, B., Audenaert, D., Smets, K., Löfgren, A., Del-Favero, J., et al. (2003). De novo SCN1A mutations are a major cause of severe myoclonic epilepsy of infancy. *Hum. Mutat.* 21, 615–621. doi:10.1002/humu.10217.
- Claes, L., Del-Favero, J., Ceulemans, B., Lagae, L., Van Broeckhoven, C., and De Jonghe, P. (2001). De novo mutations in the sodium-channel gene SCN1A cause severe myoclonic epilepsy of infancy. *Am. J. Hum. Genet.* 68, 1327–1332. doi:10.1086/320609.
- Claes, L. R. F., Deprez, L., Suls, A., Baets, J., Smets, K., Van Dyck, T., et al. (2009). The SCN1A variant database: a novel research and diagnostic tool. *Hum. Mutat.* 30, E904–E920. doi:10.1002/humu.21083.
- Coll, M., Striano, P., Ferrer-Costa, C., Campuzano, O., Matés, J., del Olmo, B., et al. (2017). Targeted next-generation sequencing provides novel clues for associated epilepsy and cardiac conduction disorder/SUDEP. *PLoS One* 12, e0189618. doi:10.1371/journal.pone.0189618.
- Colosimo, E., Gambardella, A., Mantegazza, M., Labate, A., Rusconi, R., Schiavon, E., et al. (2007). Electroclinical Features of a Family with Simple Febrile Seizures and Temporal Lobe Epilepsy Associated with SCN1A Loss-of-Function Mutation. *Epilepsia* 48, 1691–1696. doi:10.1111/j.1528-1167.2007.01153.x.
- Combi, R., Grioni, D., Contri, M., Redaelli, S., Redaelli, F., Bassi, M. T., et al. (2009). Clinical and

genetic familial study of a large cohort of Italian children with idiopathic epilepsy. *Brain Res. Bull.* 79, 89–96. doi:10.1016/j.brainresbull.2009.01.008.

- Cossette, P., Loukas, A., Lafrenière, R. G., Rochefort, D., Harvey-Girard, E., Ragsdale, D. S., et al. (2003). Functional characterization of the D188V mutation in neuronal voltage-gated sodium channel causing generalized epilepsy with febrile seizures plus (GEFS). *Epilepsy Res.* 53, 107–117. doi:10.1016/S0920-1211(02)00259-0.
- Craig, A. K., de Menezes, M. S., and Saneto, R. P. (2012). Dravet syndrome: Patients with co-morbid SCN1A gene mutations and mitochondrial electron transport chain defects. *Seizure* 21, 17–20. doi:10.1016/j.seizure.2011.08.010.
- Cui, X., Zeng, F., Liu, Y., Zhang, J., Archacki, S., Zhan, T., et al. (2011). A novel SCN1A missense mutation causes generalized epilepsy with febrile seizures plus in a Chinese family. *Neurosci. Lett.* 503, 27–30. doi:10.1016/j.neulet.2011.08.001.
- D’Gama, A. M., Pochareddy, S., Li, M., Jamuar, S. S., Reiff, R. E., Lam, A.-T. N., et al. (2015). Targeted DNA Sequencing from Autism Spectrum Disorder Brains Implicates Multiple Genetic Mechanisms. *Neuron* 88, 910–917. doi:10.1016/j.neuron.2015.11.009.
- Daoud, H., Luco, S. M., Li, R., Bareke, E., Beaulieu, C., Jarinova, O., et al. (2016). Next-generation sequencing for diagnosis of Rare diseases in the neonatal intensive care unit. *Cmaj* 188, E254–E260. doi:10.1503/cmaj.150823.
- de Kovel, C. G. F., Brilstra, E. H., Van Kempen, M. J. A., Van’t Slot, R., Nijman, I. J., Afawi, Z., et al. (2016). Targeted sequencing of 351 candidate genes for epileptic encephalopathy in a large cohort of patients. *Mol. Genet. Genomic Med.* 4, 568–580. doi:10.1002/mgg3.235.
- de Lange, I. M., Koudijs, M. J., van ’t Slot, R., Gunning, B., Sonsma, A. C. M., van Gemert, L. J. J. M., et al. (2018). Mosaicism of de novo pathogenic SCN1A variants in epilepsy is a frequent phenomenon that correlates with variable phenotypes. *Epilepsia* 59, 690–703. doi:10.1111/epi.14021.
- Depienne, C., Trouillard, O., Gourfinkel-An, I., Saint-Martin, C., Bouteiller, D., Graber, D., et al. (2010). Mechanisms for variable expressivity of inherited SCN1A mutations causing Dravet syndrome. *J. Med. Genet.* 47, 404–410. doi:10.1136/jmg.2009.074328.
- Depienne, C., Trouillard, O., Saint-Martin, C., Gourfinkel-An, I., Bouteiller, D., Carpentier, W., et al. (2008). Spectrum of SCN1A gene mutations associated with Dravet syndrome: analysis of 333 patients. *J. Med. Genet.* 46, 183–191. doi:10.1136/jmg.2008.062323.
- Dhamija, R., Erickson, M. K., St Louis, E. K., Wirrell, E., and Kotagal, S. (2014). Sleep Abnormalities in Children With Dravet Syndrome. *Pediatr. Neurol.* 50, 474–478. doi:10.1016/j.pediatrneurol.2014.01.017.
- Dhifallah, S., Lancaster, E., Merrill, S., Leroudier, N., Mantegazza, M., and Cestèle, S. (2018). Gain of function for the SCN1A/HNAv1.1-L1670W mutation responsible for familial hemiplegic migraine. *Front. Mol. Neurosci.* 11, 1–14. doi:10.3389/fnmol.2018.00232.

- Dichgans, M., Freilinger, T., Eckstein, G., Babini, E., Lorenz-Depiereux, B., Biskup, S., et al. (2005). Mutation in the neuronal voltage-gated sodium channel SCN1A in familial hemiplegic migraine. *Lancet* 366, 371–377. doi:10.1016/S0140-6736(05)66786-4.
- Dimova, P. S., Yordanova, I., Bojinova, V., Jordanova, A., and Kremenski, I. (2010). Generalized Epilepsy With Febrile Seizures plus: Novel SCN1A Mutation. *Pediatr. Neurol.* 42, 137–140. doi:10.1016/j.pediatrneurol.2009.09.007.
- Djémié, T., Weckhuysen, S., von Spiczak, S., Carvill, G. L., Jaehn, J., Anttonen, A.-K., et al. (2016). Pitfalls in genetic testing: the story of missed SCN1A mutations. *Mol. Genet. Genomic Med.* 4, 457–464. doi:10.1002/mgg3.217.
- Dlugos, D. J., Ferraro, T. N., and Buono, R. J. (2007). Novel De Novo Mutation of a Conserved SCN1A Amino-Acid Residue (R1596). *Pediatr. Neurol.* 37, 303–305. doi:10.1016/j.pediatrneurol.2007.06.008.
- Do, T. T. H., Vu, D. M., Huynh, T. T. K., Le, T. K. Van, Sohn, E.-H., Le, T. M. T., et al. (2017). SCN1A Gene Mutation and Adaptive Functioning in 18 Vietnamese Children with Dravet Syndrome. *J. Clin. Neurol.* 13, 62. doi:10.3988/jcn.2017.13.1.62.
- Doccini, S., Meschini, M. C., Mei, D., Guerrini, R., Sicca, F., and Santorelli, F. M. (2015). Mitochondrial respiratory chain defects in skin fibroblasts from patients with Dravet syndrome. *Neurol. Sci.* 36, 2151–2155. doi:10.1007/s10072-015-2324-9.
- Ebach, K., Joos, H., Doose, H., Stephani, U., Kurlemann, G., Fiedler, B., et al. (2005). SCN1A mutation analysis in myoclonic astatic epilepsy and severe idiopathic generalized epilepsy of infancy with generalized tonic-clonic seizures. *Neuropediatrics* 36, 210–213. doi:10.1055/s-2005-865607.
- Ebrahimi, A., Houshmand, M., Tonekaboni, S. H., Fallah Mahboob Passand, M. S., Zainali, S., and Moghadasi, M. (2010). Two Novel Mutations in SCN1A Gene in Iranian Patients with Epilepsy. *Arch. Med. Res.* 41, 207–214. doi:10.1016/j.arcmed.2010.04.007.
- Ekici, B., Dilber, C., Aydinli, N., Özmen, M., Tatli, B., and Çaliskan, M. (2011). Severe myoclonic epilepsy of infancy (Dravet syndrome): Clinical and genetic features of nine Turkish patients. *Ann. Indian Acad. Neurol.* 14, 178. doi:10.4103/0972-2327.85879.
- Escayg, A., Heils, A., MacDonald, B. T., Haug, K., Sander, T., and Meisler, M. H. (2001). A Novel SCN1A Mutation Associated with Generalized Epilepsy with Febrile Seizures Plus—and Prevalence of Variants in Patients with Epilepsy. *Am. J. Hum. Genet.* 68, 866–873. doi:10.1086/319524.
- Escayg, A., MacDonald, B. T., Meisler, M. H., Baulac, S., Huberfeld, G., An-Gourfinkel, I., et al. (2000). Mutations of SCN1A, encoding a neuronal sodium channel, in two families with GEFS+2. *Nat. Genet.* 24, 343–345. doi:10.1038/74159.
- Esterhuizen, A. I., Mefford, H. C., Ramesar, R. S., Wang, S., Carvill, G. L., and Wilmschurst, J. M. (2018). Dravet syndrome in South African infants: Tools for an early diagnosis. *Seizure* 62, 99–105. doi:10.1016/j.seizure.2018.09.010.

- Fan, C., Wolking, S., Lehmann-Horn, F., Hedrich, U. B. S., Freilinger, T., Lerche, H., et al. (2016). Early-onset familial hemiplegic migraine due to a novel SCN1A mutation. *Cephalalgia* 36, 1238–1247. doi:10.1177/0333102415608360.
- Farwell, K. D., Shahmirzadi, L., El-Khechen, D., Powis, Z., Chao, E. C., Tippin Davis, B., et al. (2015). Enhanced utility of family-centered diagnostic exome sequencing with inheritance model-based analysis: results from 500 unselected families with undiagnosed genetic conditions. *Genet. Med.* 17, 578–586. doi:10.1038/gim.2014.154.
- Fendri-Kriaa, N., Kammoun, F., Rebai, A., Kolsi, D., Hadj Salem, I., Fakhfakh, F., et al. (2009). Genetic screening of two Tunisian families with generalized epilepsy with febrile seizures plus. *Eur. J. Neurol.* 16, 697–704. doi:10.1111/j.1468-1331.2009.02570.x.
- Freilich, E. R., Jones, J. M., Gaillard, W. D., Conry, J. A., Tsuchida, T. N., Reyes, C., et al. (2011). Novel SCN1A mutation in a proband with malignant migrating partial seizures of infancy. *Arch. Neurol.* 68, 665–671. doi:10.1001/archneurol.2011.98.
- Fry, A. E., Rees, E., Thompson, R., Mantripragada, K., Blake, P., Jones, G., et al. (2016). Pathogenic copy number variants and SCN1A mutations in patients with intellectual disability and childhood-onset epilepsy. *BMC Med. Genet.* 17, 34. doi:10.1186/s12881-016-0294-2.
- Fujiwara, T. (2003). Mutations of sodium channel alpha subunit type 1 (SCN1A) in intractable childhood epilepsies with frequent generalized tonic-clonic seizures. *Brain* 126, 531–546. doi:10.1093/brain/awg053.
- Fukuma, G., Oguni, H., Shirasaka, Y., Watanabe, K., Miyajima, T., Yasumoto, S., et al. (2004). Mutations of Neuronal Voltage-gated Na<sup>+</sup> Channel alpha1 Subunit Gene SCN1A in Core Severe Myoclonic Epilepsy in Infancy (SMEI) and in Borderline SMEI (SMEB). *Epilepsia* 45, 140–148. doi:10.1111/j.0013-9580.2004.15103.x.
- Gaily, E., Anttonen, A.-K., Valanne, L., Liukkonen, E., Träskelin, A.-L., Polvi, A., et al. (2013). Dravet syndrome: New potential genetic modifiers, imaging abnormalities, and ictal findings. *Epilepsia* 54, 1577–1585. doi:10.1111/epi.12256.
- Gargus, J. J., and Tournay, A. (2007). Novel Mutation Confirms Seizure Locus SCN1A is Also Familial Hemiplegic Migraine Locus FHM3. *Pediatr. Neurol.* 37, 407–410. doi:10.1016/j.pediatrneurol.2007.06.016.
- Gauthier, A. C., Manganas, L. N., and Mattson, R. H. (2017). A novel inherited SCN1A mutation associated with GEFS+ in benign and encephalopathic epilepsy. *J. Clin. Neurosci.* 40, 82–84. doi:10.1016/j.jocn.2017.02.011.
- George, A. L. (2004). Molecular basis of inherited epilepsy. *Arch. Neurol.* 61, 473–478. doi:10.1001/archneur.61.4.473.
- Goeggel Simonetti, B., Rieubland, C., Courage, C., Strozzi, S., Tschumi, S., Gallati, S., et al. (2012). Duplication of the sodium channel gene cluster on 2q24 in children with early onset epilepsy. *Epilepsia* 53, 2128–2134. doi:10.1111/j.1528-1167.2012.03676.x.

- Gökben, S., Berdeli, A., and Serdarolu, G. (2009). An inherited nonsense R1645X mutation in neuronal sodium channel 1-subunit gene in a Turkish patient with severe myoclonic epilepsy of infancy. *Neuropediatrics* 40, 82–84. doi:10.1055/s-0029-1234083.
- Gokben, S., Onay, H., Yilmaz, S., Atik, T., Serdaroglu, G., Tekin, H., et al. (2017). Targeted next generation sequencing: the diagnostic value in early-onset epileptic encephalopathy. *Acta Neurol. Belg.* 117, 131–138. doi:10.1007/s13760-016-0709-z.
- Goldberg-Stern, H., Aharoni, S., Afawi, Z., Bennett, O., Appenzeller, S., Pendziwiat, M., et al. (2014). Broad Phenotypic Heterogeneity due to a Novel SCN1A Mutation in a Family With Genetic Epilepsy With Febrile Seizures Plus. *J. Child Neurol.* 29, 221–226. doi:10.1177/0883073813509016.
- Grosso, S., Orrico, A., Galli, L., Di Bartolo, R., Sorrentino, V., and Balestri, P. (2007). SCN1A mutation associated with atypical panayiotopoulos syndrome. *Neurology* 69, 609–611. doi:10.1212/01.wnl.0000266666.10404.53.
- Haginoya, K., Togashi, N., Kaneta, T., Hino-Fukuyo, N., Ishitobi, M., Kakisaka, Y., et al. (2018). [18F]fluorodeoxyglucose-positron emission tomography study of genetically confirmed patients with Dravet syndrome. *Epilepsy Res.* 147, 9–14. doi:10.1016/j.epilepsyres.2018.08.008.
- Halvorsen, M., Petrovski, S., Shellhaas, R., Tang, Y., Crandall, L., Goldstein, D., et al. (2016). Mosaic mutations in early-onset genetic diseases. *Genet. Med.* 18, 746–749. doi:10.1038/gim.2015.155.
- Hamdan, F. F., Myers, C. T., Cossette, P., Lemay, P., Spiegelman, D., Laporte, A. D., et al. (2017). High Rate of Recurrent De Novo Mutations in Developmental and Epileptic Encephalopathies. *Am. J. Hum. Genet.* 101, 664–685. doi:10.1016/j.ajhg.2017.09.008.
- Harkin, L. A., McMahon, J. M., Iona, X., Dibbens, L., Pelekanos, J. T., Zuberi, S. M., et al. (2007). The spectrum of SCN1A-related infantile epileptic encephalopathies. *Brain* 130, 843–852. doi:10.1093/brain/awm002.
- Hattori, J., Ouchida, M., Ono, J., Miyake, S., Maniwa, S., Mimaki, N., et al. (2008). A Screening test for the prediction of Dravet syndrome before one year of age. *Epilepsia* 49, 626–633. doi:10.1111/j.1528-1167.2007.01475.x.
- Helbig, K. L., Farwell Hagman, K. D., Shinde, D. N., Mroske, C., Powis, Z., Li, S., et al. (2016). Diagnostic exome sequencing provides a molecular diagnosis for a significant proportion of patients with epilepsy. *Genet. Med.* 18, 898–905. doi:10.1038/gim.2015.186.
- Herini, E. S., Gunadi, van Kempen, M. J. A., Yusoff, S., Sutaryo, Sunartini, et al. (2010). Novel SCN1A mutations in Indonesian patients with severe myoclonic epilepsy in infancy. *Pediatr. Int.* 52, 234–239. doi:10.1111/j.1442-200X.2009.02916.x.
- Hernández Chávez, M., Mesa Latorre, T., Pedraza Herrera, M., and Troncoso Schifferli, M. (2014). ¿Crisis febriles complejas o síndrome de Dravet?: Descripción de 3 casos clínicos. *Rev. Chil. pediatría* 85, 588–593. doi:10.4067/S0370-41062014000500010.
- Hesse, A. N., Bevilacqua, J., Shankar, K., and Reddi, H. V. (2018). Retrospective genotype-

phenotype analysis in a 305 patient cohort referred for testing of a targeted epilepsy panel. *Epilepsy Res.* 144, 53–61. doi:10.1016/j.epilepsyres.2018.05.004.

- Hildebrand, M. S., Myers, C. T., Carvill, G. L., Regan, B. M., Damiano, J. A., Mullen, S. A., et al. (2016). A targeted resequencing gene panel for focal epilepsy. *Neurology* 86, 1605–1612. doi:10.1212/WNL.0000000000002608.
- Hindocha, N., Nashef, L., Elmslie, F., Birch, R., Zuberi, S., Al-Chalabi, A., et al. (2008). Two cases of sudden unexpected death in epilepsy in a GEFS+ family with an SCN1A mutation. *Epilepsia* 49, 360–365. doi:10.1111/j.1528-1167.2007.01439\_2.x.
- Hoffman-Zacharska, D., Szczepanik, E., Terczynska, I., Goszczanska-Ciuchta, A., Zalewska-Miskurka, Z., Tataj, R., et al. (2015). From focal epilepsy to dravet syndrome –heterogeneity of the phenotype due to SCN1A mutations of the p.Arg1596 amino acid residue in the nav1.1 subunit. *Neurol. Neurochir. Pol.* 49, 258–266. doi:10.1016/j.pjnns.2015.06.006.
- Huang, A. Y., Xu, X., Ye, A. Y., Wu, Q., Yan, L., Zhao, B., et al. (2014). Postzygotic single-nucleotide mosaicisms in whole-genome sequences of clinically unremarkable individuals. *Cell Res.* 24, 1311–1327. doi:10.1038/cr.2014.131.
- Iannetti, P., Parisi, P., Spalice, A., Ruggieri, M., and Zara, F. (2009). Addition of verapamil in the treatment of severe myoclonic epilepsy in infancy. *Epilepsy Res.* 85, 89–95. doi:10.1016/j.epilepsyres.2009.02.014.
- Ishii, A., Watkins, J. C., Chen, D., Hirose, S., and Hammer, M. F. (2017). Clinical implications of SCN1A missense and truncation variants in a large Japanese cohort with Dravet syndrome. *Epilepsia* 58, 282–290. doi:10.1111/epi.13639.
- Jiao, J., Yang, Y., Shi, Y., Chen, J., Gao, R., Fan, Y., et al. (2013). Modeling Dravet syndrome using induced pluripotent stem cells (iPSCs) and directly converted neurons. *Hum. Mol. Genet.* 22, 4241–4252. doi:10.1093/hmg/ddt275.
- Jiménez-Arredondo, R. E., Brambila-Tapia, A. J. L., Mercado-Silva, F. M., Magaña-Torres, M. T., and Figuera, L. E. (2017). Determination of SCN1A genetic variants in Mexican patients with refractory epilepsy and Dravet syndrome. *Genet. Mol. Res.* 16, 1–5. doi:10.4238/gmr16029405.
- Jingami, N., Matsumoto, R., Ito, H., Ishii, A., Ihara, Y., Hirose, S., et al. (2014). A novel SCN1A mutation in a cytoplasmic loop in intractable juvenile myoclonic epilepsy without febrile seizures. *Epileptic Disord.* 16, 227–231. doi:10.1684/epd.2014.0657.
- Kahlig, K. M., Rhodes, T. H., Pusch, M., Freilinger, T., Pereira-Monteiro, J. M., Ferrari, M. D., et al. (2008). Divergent sodium channel defects in familial hemiplegic migraine. *Proc. Natl. Acad. Sci. U. S. A.* 105, 9799–9804. doi:10.1073/pnas.0711717105.
- Kearney, J. A., Yang, Y., Beyer, B., Bergren, S. K., Claes, L., DeJonghe, P., et al. (2006). Severe epilepsy resulting from genetic interaction between Scn2a and Kcnq2. *Hum. Mol. Genet.* 15, 1043–1048. doi:10.1093/hmg/ddl019.
- Kim, D. W., Lim, B. C., Kim, K. J., Chae, J. H., Lee, R., and Lee, S. K. (2013). Low incidence of

SCN1A genetic mutation in patients with hemiconvulsion–hemiplegia–epilepsy syndrome. *Epilepsy Res.* 106, 440–445. doi:10.1016/j.epilepsyres.2013.06.012.

- Kim, J., and Lee, C. G. (2017). Coinheritance of Novel Mutations in SCN1A Causing GEFS+ and in KDM6A Causing Kabuki Syndrome in a Family. *Ann. Clin. Lab. Sci.* 47, 229–235. Available at: <http://www.ncbi.nlm.nih.gov/pubmed/28442529>.
- Kim, Y. O., Bellows, S., McMahon, J. M., Iona, X., Damiano, J., Dibbens, L., et al. (2014). Atypical multifocal Dravet syndrome lacks generalized seizures and may show later cognitive decline. *Dev. Med. Child Neurol.* 56, 85–90. doi:10.1111/dmcn.12322.
- Kimura, K., Sugawara, T., Mazaki-Miyazaki, E., Hoshino, K., Nomura, Y., Tateno, A., et al. (2005). A missense mutation in SCN1A in brothers with severe myoclonic epilepsy in infancy (SMEI) inherited from a father with febrile seizures. *Brain Dev.* 27, 424–430. doi:10.1016/j.braindev.2004.11.005.
- Kivity, S., Oliver, K. L., Afawi, Z., Damiano, J. A., Arsov, T., Bahlo, M., et al. (2017). SCN1A clinical spectrum includes the self-limited focal epilepsies of childhood. *Epilepsy Res.* 131, 9–14. doi:10.1016/j.epilepsyres.2017.01.012.
- Klassen, T., Davis, C., Goldman, A., Burgess, D., Chen, T., Wheeler, D., et al. (2011). Exome Sequencing of Ion Channel Genes Reveals Complex Profiles Confounding Personal Risk Assessment in Epilepsy. *Cell* 145, 1036–1048. doi:10.1016/j.cell.2011.05.025.
- Ko, A., Youn, S. E., Kim, S. H., Lee, J. S., Kim, S., Choi, J. R., et al. (2018). Targeted gene panel and genotype-phenotype correlation in children with developmental and epileptic encephalopathy. *Epilepsy Res.* 141, 48–55. doi:10.1016/j.epilepsyres.2018.02.003.
- Kodera, H., Kato, M., Nord, A. S., Walsh, T., Lee, M., Yamanaka, G., et al. (2013). Targeted capture and sequencing for detection of mutations causing early onset epileptic encephalopathy. *Epilepsia* 54, 1262–1269. doi:10.1111/epi.12203.
- Kothur, K., Holman, K., Farnsworth, E., Ho, G., Lorentzos, M., Troedson, C., et al. (2018). Diagnostic yield of targeted massively parallel sequencing in children with epileptic encephalopathy. *Seizure* 59, 132–140. doi:10.1016/j.seizure.2018.05.005.
- Kumar, A., Juhász, C., Luat, A., Govil-Dalela, T., Behen, M. E., Hicks, M. A., et al. (2018). Evolution of Brain Glucose Metabolic Abnormalities in Children With Epilepsy and SCN1A Gene Variants. *J. Child Neurol.* 33, 832–836. doi:10.1177/0883073818796373.
- Kwong, A. K.-Y., Ho, A. C.-C., Fung, C.-W., and Wong, V. C.-N. (2015). Analysis of Mutations in 7 Genes Associated with Neuronal Excitability and Synaptic Transmission in a Cohort of Children with Non-Syndromic Infantile Epileptic Encephalopathy. *PLoS One* 10, e0126446. doi:10.1371/journal.pone.0126446.
- Kwong, A. K. Y., Fung, C. W., Chan, S. Y., and Wong, V. C. N. (2012). Identification of SCN1A and PCDH19 mutations in Chinese children with Dravet syndrome. *PLoS One* 7, e41802. doi:10.1371/journal.pone.0041802.
- Lal, D., Reinthaler, E. M., Dejanovic, B., May, P., Thiele, H., Lehesjoki, A.-E., et al. (2016).

Evaluation of Presumably Disease Causing SCN1A Variants in a Cohort of Common Epilepsy Syndromes. *PLoS One* 11, e0150426. doi:10.1371/journal.pone.0150426.

- Lam, C. W., Law, C. Y., Leung, K. F., Lai, C. K., Pak-lam Chen, S., Chan, B., et al. (2015). NMR-based urinalysis for rapid diagnosis of  $\beta$ -ureidopropionase deficiency in a patient with Dravet syndrome. *Clin. Chim. Acta* 440, 201–204. doi:10.1016/j.cca.2014.10.030.
- Langer, S., Geigl, J. B., Wagenstaller, J., Lederer, G., Hempel, M., Daumer-Haas, C., et al. (2006). Delineation of a 2q deletion in a girl with dysmorphic features and epilepsy. *Am. J. Med. Genet. Part A* 140A, 764–768. doi:10.1002/ajmg.a.31141.
- Le Gal, F., Korff, C. M., Monso-Hinard, C., Mund, M. T., Morris, M., Malafosse, A., et al. (2010). A case of SUDEP in a patient with Dravet syndrome with SCN1A mutation. *Epilepsia* 51, 1915–1918. doi:10.1111/j.1528-1167.2010.02691.x.
- Le Gal, F., Lebon, S., Ramelli, G. P., Datta, A. N., Mercati, D., Maier, O., et al. (2014). When is a child with status epilepticus likely to have Dravet syndrome? *Epilepsy Res.* 108, 740–747. doi:10.1016/j.eplepsyres.2014.02.019.
- Lee, C. G., Lee, J., and Lee, M. (2018). Multi-gene panel testing in Korean patients with common genetic generalized epilepsy syndromes. *PLoS One* 13, e0199321. doi:10.1371/journal.pone.0199321.
- Lee, H.-F., Chi, C.-S., Tsai, C.-R., Chen, C.-H., and Wang, C.-C. (2014). Electroencephalographic features of patients with SCN1A-positive Dravet syndrome. *Brain Dev.* 37, 599–611. doi:10.1016/j.braindev.2014.10.003.
- Lee, J. S., Jung, N. Y., Jang, Y. K., Kim, H. J., Seo, S. W., Lee, J., et al. (2017). Prognosis of patients with behavioral variant frontotemporal dementia who have focal versus diffuse frontal atrophy. *J. Clin. Neurol.* 13, 234–242. doi:10.3988/jcn.2017.13.3.234.
- Lemke, J. R., Riesch, E., Scheurenbrand, T., Schubach, M., Wilhelm, C., Steiner, I., et al. (2012). Targeted next generation sequencing as a diagnostic tool in epileptic disorders. *Epilepsia* 53, 1387–1398. doi:10.1111/j.1528-1167.2012.03516.x.
- Liao, W.-P., Shi, Y.-W., Long, Y.-S., Zeng, Y., Li, T., Yu, M.-J., et al. (2010). Partial epilepsy with antecedent febrile seizures and seizure aggravation by antiepileptic drugs: Associated with loss of function of Nav1.1. *Epilepsia* 51, 1669–1678. doi:10.1111/j.1528-1167.2010.02645.x.
- Lim, B. C., Hwang, H., Chae, J. H., Choi, J.-E., Hwang, Y. S., Kang, S.-H., et al. (2011). SCN1A mutational analysis in Korean patients with Dravet syndrome. *Seizure* 20, 789–794. doi:10.1016/j.seizure.2011.08.002.
- Lim, B. C., Hwang, H., Kim, H., Chae, J.-H., Choi, J., Kim, K. J., et al. (2015). Epilepsy phenotype associated with a chromosome 2q24.3 deletion involving SCN1A: Migrating partial seizures of infancy or atypical Dravet syndrome? *Epilepsy Res.* 109, 34–39. doi:10.1016/j.eplepsyres.2014.10.008.
- Lin, W.-D., Chang, K.-P., Wang, C.-H., Chen, S.-J., Fan, P.-C., Weng, W.-C., et al. (2013).



Molecular aspects of Dravet syndrome patients in Taiwan. *Clin. Chim. Acta* 421, 34–40. doi:10.1016/j.cca.2013.02.015.

- Lin, W.-D., Chou, I.-C., and Tsai, F.-J. (2010). Novel human pathological mutations. Gene symbol: SCN1A. Disease: generalized epilepsy with febrile seizures plus. *Hum. Genet.* 127, 478. Available at: <http://www.ncbi.nlm.nih.gov/pubmed/21488289>.
- Lindy, A. S., Stosser, M. B., Butler, E., Downtain-Pickersgill, C., Shanmugham, A., Retterer, K., et al. (2018). Diagnostic outcomes for genetic testing of 70 genes in 8565 patients with epilepsy and neurodevelopmental disorders. *Epilepsia* 59, 1062–1071. doi:10.1111/epi.14074.
- Liu, J., Tong, L., Song, S., Niu, Y., Li, J., Wu, X., et al. (2018). Novel and de novo mutations in pediatric refractory epilepsy. *Mol. Brain* 11, 48. doi:10.1186/s13041-018-0392-5.
- Liu, Y., Lopez-Santiago, L. F., Yuan, Y., Jones, J. M., Zhang, H., O'Malley, H. A., et al. (2013). Dravet syndrome patient-derived neurons suggest a novel epilepsy mechanism. *Ann. Neurol.* 74, 128–139. doi:10.1002/ana.23897.
- Livingston, J. H., Cross, J. H., Mcllellan, A., Birch, R., and Zuberi, S. M. (2009). A Novel Inherited Mutation in the Voltage Sensor Region of SCN1A Is Associated With Panayiotopoulos Syndrome in Siblings and Generalized Epilepsy With Febrile Seizures Plus. *J. Child Neurol.* 24, 503–508. doi:10.1177/0883073808324537.
- Lossin, C. (2009). A catalog of SCN1A variants. *Brain Dev.* 31, 114–130. doi:10.1016/j.braindev.2008.07.011.
- Lossin, C., Rhodes, T. H., Desai, R. R., Vanoye, C. G., Wang, D., Carniciu, S., et al. (2003). Epilepsy-Associated Dysfunction in the Voltage-Gated Neuronal Sodium Channel SCN1A. *J. Neurosci.* 23, 11289–11295. doi:10.1523/jneurosci.23-36-11289.2003.
- Ma, Y., Chen, C., Wang, Y., Wu, L., He, F., Chen, C., et al. (2016). Analysis copy number variation of Chinese children in early-onset epileptic encephalopathies with unknown cause. *Clin. Genet.* 90, 428–436. doi:10.1111/cge.12768.
- Madia, F., Striano, P., Gennaro, E., Malacarne, M., Paravidino, R., Biancheri, R., et al. (2006). Cryptic chromosome deletions involving SCN1A in severe myoclonic epilepsy of infancy. *Neurology* 67, 1230–1235. doi:10.1212/01.wnl.0000238513.70878.54.
- Mahdih, N., Mikaeeli, S., Bady, R. S., Shirazi, A. G., Maleki, M., and Rabbani, B. (2018). Pathogenic significance of SCN1A splicing variants causing Dravet syndrome: Improving diagnosis with targeted sequencing for variants by in silico analysis. *Clin. Neurol. Neurosurg.* 166, 80–90. doi:10.1016/j.clineuro.2018.01.030.
- Mahoney, K., Moore, S. J., Buckley, D., Alam, M., Parfrey, P., Penney, S., et al. (2009). Variable neurologic phenotype in a GEFS+ family with a novel mutation in SCN1A. *Seizure* 18, 492–497. doi:10.1016/j.seizure.2009.04.009.
- Mak, C. M., Chan, K. Y. W., Yau, E. K. C., Chen, S. P. L., Siu, W. K., Law, C. Y., et al. (2011). Genetic diagnosis of severe myoclonic epilepsy of infancy (Dravet syndrome) with SCN1A mutations in the Hong Kong Chinese patients. *Hong Kong Med. J. = Xianggang yi xue za zhi*

17, 500–2. Available at: <http://www.ncbi.nlm.nih.gov/pubmed/22147323>.

- Maksemous, N., Smith, R. A., Haupt, L. M., and Griffiths, L. R. (2016). Targeted next generation sequencing identifies novel NOTCH3 gene mutations in CADASIL diagnostics patients. *Hum. Genomics* 10, 38. doi:10.1186/s40246-016-0093-z.
- Mantegazza, M., Gambardella, A., Rusconi, R., Schiavon, E., Annesi, F., Cassulini, R. R., et al. (2005). Identification of an Nav1.1 sodium channel (SCN1A) loss-of-function mutation associated with familial simple febrile seizures. *Proc. Natl. Acad. Sci. U. S. A.* 102, 18177–18182. doi:10.1073/pnas.0506818102.
- Margherita Mancardi, M., Striano, P., Gennaro, E., Madia, F., Paravidino, R., Scapolan, S., et al. (2006). Familial Occurrence of Febrile Seizures and Epilepsy in Severe Myoclonic Epilepsy of Infancy (SMEI) Patients with SCN1A Mutations. *Epilepsia* 47, 1629–1635. doi:10.1111/j.1528-1167.2006.00641.x.
- Marini, C., Mei, D., Temudo, T., Ferrari, A. R., Buti, D., Dravet, C., et al. (2007). Idiopathic Epilepsies with Seizures Precipitated by Fever and SCN1A Abnormalities. *Epilepsia* 48, 1678–1685. doi:10.1111/j.1528-1167.2007.01122.x.
- Martin, P., Rautenstrauß, B., Abicht, A., Fahrbach, J., and Koster, S. (2010). Severe Myoclonic Epilepsy in Infancy – Adult Phenotype with Bradykinesia, Hypomimia, and Perseverative Behavior: Report of Five Cases. *Mol. Syndromol.* 1, 231–238. doi:10.1159/000326746.
- McArdle, E. J., Kunic, J. D., and George, A. L. (2008). Novel SCN1A frameshift mutation with absence of truncated Na V 1.1 protein in severe myoclonic epilepsy of infancy. *Am. J. Med. Genet. Part A* 146A, 2421–2423. doi:10.1002/ajmg.a.32448.
- Mercimek-Mahmutoglu, S., Patel, J., Cordeiro, D., Hewson, S., Callen, D., Donner, E. J., et al. (2015). Diagnostic yield of genetic testing in epileptic encephalopathy in childhood. *Epilepsia* 56, 707–716. doi:10.1111/epi.12954.
- Mhanni, A. A., Hartley, J. N., Sanger, W. G., Chudley, A. E., and Spriggs, E. L. (2011). Variable expressivity of a novel mutation in the SCN1A gene leading to an autosomal dominant seizure disorder. *Seizure* 20, 711–712. doi:10.1016/j.seizure.2011.06.014.
- Mina, E. Della, Ciccone, R., Brustia, F., Bayindir, B., Limongelli, I., Vetro, A., et al. (2015). Improving molecular diagnosis in epilepsy by a dedicated high-throughput sequencing platform. *Eur. J. Hum. Genet.* 23, 354–362. doi:10.1038/ejhg.2014.92.
- Miyama, S., Goto, T., Inoue, Y., and Yamakawa, K. (2008). Monozygotic Twins With Severe Myoclonic Epilepsy in Infancy Discordant for Clinical Features. *Pediatr. Neurol.* 39, 120–122. doi:10.1016/j.pediatrneurol.2008.04.003.
- Moehring, J., Von Spiczak, S., Moeller, F., Helbig, I., Wolff, S., Jansen, O., et al. (2013). Variability of EEG-fMRI findings in patients with SCN1A -positive Dravet syndrome. *Epilepsia* 54, 918–926. doi:10.1111/epi.12119.
- Møller, R. S., Larsen, L. H. G., Johannesen, K. M., Talvik, I., Talvik, T., Vaher, U., et al. (2016).

Gene panel testing in epileptic encephalopathies and familial epilepsies. *Mol. Syndromol.* 7, 210–219. doi:10.1159/000448369.

- Møller, R. S., Schneider, L. M., Hansen, C. P., Bugge, M., Ullmann, R., Tommerup, N., et al. (2008). Balanced translocation in a patient with severe myoclonic epilepsy of infancy disrupts the sodium channel gene SCN1A. *Epilepsia* 49, 1091–1094. doi:10.1111/j.1528-1167.2008.01550.x.
- Morimoto, M., Mazaki, E., Nishimura, A., Chiyonobu, T., Sawai, Y., Murakami, A., et al. (2006). SCN1A Mutation Mosaicism in a Family with Severe Myoclonic Epilepsy in Infancy. *Epilepsia* 47, 1732–1736. doi:10.1111/j.1528-1167.2006.00645.x.
- Mulley, J. C., Hodgson, B., McMahon, J. M., Iona, X., Bellows, S., Mullen, S. A., et al. (2013). Role of the sodium channel SCN9A in genetic epilepsy with febrile seizures plus and Dravet syndrome. *Epilepsia* 54, e122–e126. doi:10.1111/epi.12323.
- Muona, M., Berkovic, S. F., Dibbens, L. M., Oliver, K. L., Maljevic, S., Bayly, M. A., et al. (2015). A recurrent de novo mutation in KCNC1 causes progressive myoclonus epilepsy. *Nat. Genet.* 47, 39–46. doi:10.1038/ng.3144.
- Myers, K. A., Burgess, R., Afawi, Z., Damiano, J. A., Berkovic, S. F., Hildebrand, M. S., et al. (2017a). De novo SCN1A pathogenic variants in the GEFS+ spectrum: Not always a familial syndrome. *Epilepsia* 58, e26–e30. doi:10.1111/epi.13649.
- Myers, K. A., McMahon, J. M., Mandelstam, S. A., Mackay, M. T., Kalnins, R. M., Leventer, R. J., et al. (2017b). Fatal Cerebral Edema With Status Epilepticus in Children With Dravet Syndrome: Report of 5 Cases. *Pediatrics* 139, e20161933. doi:10.1542/peds.2016-1933.
- Nabbout, R., Gennaro, E., Dalla Bernardina, B., Dulac, O., Madia, F., Bertini, E., et al. (2003). Spectrum of SCN1A mutations in severe myoclonic epilepsy of infancy. *Neurology* 60, 1961–1967. doi:10.1212/01.WNL.0000069463.41870.2F.
- Nagao, Y., Mazaki-Miyazaki, E., Okamura, N., Takagi, M., Igarashi, T., and Yamakawa, K. (2005). A family of generalized epilepsy with febrile seizures plus type 2—a new missense mutation of SCN1A found in the pedigree of several patients with complex febrile seizures. *Epilepsy Res.* 63, 151–156. doi:10.1016/j.eplepsyres.2004.11.005.
- Nakayama, T., Ogiwara, I., Ito, K., Kaneda, M., Mazaki, E., Osaka, H., et al. (2010). Deletions of SCN1A 5' genomic region with promoter activity in Dravet syndrome. *Hum. Mutat.* 31, 820–829. doi:10.1002/humu.21275.
- Nicholl, J., Waters, W., Suwalski, S., Brown, S., Hull, Y., Harbord, M. G., et al. (2013). Epilepsy with cognitive deficit and autism spectrum disorders: Prospective diagnosis by array CGH. *Am. J. Med. Genet. Part B Neuropsychiatr. Genet.* 162, 24–35. doi:10.1002/ajmg.b.32114.
- Nicita, F., Spalice, A., Papetti, L., Ursitti, F., Parisi, P., Gennaro, E., et al. (2010). Genotype-phenotype correlations in a group of 15 SCN1A-mutated Italian patients with GEFS+ spectrum (seizures plus, classical and borderline severe myoclonic epilepsy of infancy). *J. Child Neurol.* 25, 1369–1376. doi:10.1177/0883073810365737.

- Nishri, D., Blumkin, L., Lev, D., Leshinsky-Silver, E., Abu-Rashid, M., Birch, R., et al. (2010). Hepatic coma culminating in severe brain damage in a child with a SCN1A mutation. *Eur. J. Paediatr. Neurol.* 14, 456–459. doi:10.1016/j.ejpn.2010.03.002.
- O’Roak, B. J., Deriziotis, P., Lee, C., Vives, L., Schwartz, J. J., Girirajan, S., et al. (2011). Exome sequencing in sporadic autism spectrum disorders identifies severe de novo mutations. *Nat. Genet.* 43, 585–589. doi:10.1038/ng.835.
- Oates, S., Tang, S., Rosch, R., Lear, R., Hughes, E. F., Williams, R. E., et al. (2018). Incorporating epilepsy genetics into clinical practice: A 360° evaluation. *npj Genomic Med.* 3, 1–11. doi:10.1038/s41525-018-0052-9.
- Ohashi, T., Akasaka, N., Kobayashi, Y., Magara, S., Kawashima, H., Matsumoto, N., et al. (2014). Infantile epileptic encephalopathy with a hyperkinetic movement disorder and hand stereotypies associated with a novel SCN1A mutation. *Epileptic Disord.* 16, 208–212. doi:10.1684/epd.2014.0649.
- Ohmori, I., Kahlig, K. M., Rhodes, T. H., Wang, D. W., and George, A. L. (2006). Nonfunctional SCN1A Is Common in Severe Myoclonic Epilepsy of Infancy. *Epilepsia* 47, 1636–1642. doi:10.1111/j.1528-1167.2006.00643.x.
- Ohmori, I., Ouchida, M., Kobayashi, K., Jitsumori, Y., Inoue, T., Shimizu, K., et al. (2008). Rasmussen encephalitis associated with SCN1A mutation. *Epilepsia* 49, 521–526. doi:10.1111/j.1528-1167.2007.01411.x.
- Ohmori, I., Ouchida, M., Ohtsuka, Y., Oka, E., and Shimizu, K. (2002). Significant correlation of the SCN1A mutations and severe myoclonic epilepsy in infancy. *Biochem. Biophys. Res. Commun.* 295, 17–23. doi:10.1016/S0006-291X(02)00617-4.
- Okumura, A., Uematsu, M., Imataka, G., Tanaka, M., Okanishi, T., Kubota, T., et al. (2012). Acute encephalopathy in children with Dravet syndrome. *Epilepsia* 53, 79–86. doi:10.1111/j.1528-1167.2011.03311.x.
- Okumura, A., Yamamoto, T., Shimojima, K., Honda, Y., Abe, S., Ikeno, M., et al. (2011). Refractory neonatal epilepsy with a de novo duplication of chromosome 2q24.2q24.3. *Epilepsia* 52, e66–e69. doi:10.1111/j.1528-1167.2011.03139.x.
- Orrico, A., Galli, L., Grosso, S., Buoni, S., Pianigiani, R., Balestri, P., et al. (2009). Mutational analysis of the SCN1A, SCN1B and GABRG2 genes in 150 Italian patients with idiopathic childhood epilepsies. *Clin. Genet.* 75, 579–581. doi:10.1111/j.1399-0004.2009.01155.x.
- Osaka, H., Ogiwara, I., Mazaki, E., Okamura, N., Yamashita, S., Iai, M., et al. (2007). Patients with a sodium channel alpha 1 gene mutation show wide phenotypic variation. *Epilepsy Res.* 75, 46–51. doi:10.1016/j.eplepsyres.2007.03.018.
- Ostrander, B. E. P., Butterfield, R. J., Pedersen, B. S., Farrell, A. J., Layer, R. M., Ward, A., et al. (2018). Whole-genome analysis for effective clinical diagnosis and gene discovery in early infantile epileptic encephalopathy. *npj Genomic Med.* 3, 22. doi:10.1038/s41525-018-0061-8.

- Ozmen, M., Dilber, C., Tatlı, B., Aydınli, N., Çalışkan, M., and Ekici, B. (2011). Severe myoclonic epilepsy of infancy (Dravet syndrome): Clinical and genetic features of nine Turkish patients. *Ann. Indian Acad. Neurol.* 14, 178–81. doi:10.4103/0972-2327.85879.
- Parrini, E., Marini, C., Mei, D., Galuppi, A., Cellini, E., Pucatti, D., et al. (2017). Diagnostic Targeted Resequencing in 349 Patients with Drug-Resistant Pediatric Epilepsies Identifies Causative Mutations in 30 Different Genes. *Hum. Mutat.* 38, 216–225. doi:10.1002/humu.23149.
- Pérez Delgado, R., Lafuente Hidalgo, M., López Pisón, J., Sebastián Torres, B., Torres Claveras, S., García Jiménez, M. C., et al. (2010). Epilepsia de inicio entre el mes y los tres meses de vida: nuestra experiencia de 11 años. *Neurología* 25, 90–95. doi:10.1016/S0213-4853(10)70032-3.
- Perucca, P., Scheffer, I. E., Harvey, A. S., James, P. A., Lunke, S., Thorne, N., et al. (2017). Real-world utility of whole exome sequencing with targeted gene analysis for focal epilepsy. *Epilepsy Res.* 131, 1–8. doi:10.1016/j.eplesyres.2017.02.001.
- Pescucci, C., Caselli, R., Grosso, S., Mencarelli, M. A., Mari, F., Farnetani, M. A., et al. (2007). 2q24–q31 Deletion: Report of a case and review of the literature. *Eur. J. Med. Genet.* 50, 21–32. doi:10.1016/j.ejmg.2006.09.001.
- Peters, C., Rosch, R. E., Hughes, E., and Ruben, P. C. (2016). Temperature-dependent changes in neuronal dynamics in a patient with an SCN1A mutation and hyperthermia induced seizures. *Sci. Rep.* 6, 31879. doi:10.1038/srep31879.
- Petrelli, C., Passamonti, C., Cesaroni, E., Mei, D., Guerrini, R., Zamponi, N., et al. (2012). Early clinical features in Dravet syndrome patients with and without SCN1A mutations. *Epilepsy Res.* 99, 21–27. doi:10.1016/j.eplesyres.2011.10.010.
- Pineda-Trujillo, N., Carrizosa, J., Cornejo, W., Arias, W., Franco, C., Cabrera, D., et al. (2005). A novel SCN1A mutation associated with severe GEFS+ in a large South American pedigree. *Seizure* 14, 123–128. doi:10.1016/j.seizure.2004.12.007.
- Pippucci, T., Licchetta, L., Baldassari, S., Palombo, F., Menghi, V., D’Aurizio, R., et al. (2015). Epilepsy with auditory features. *Neurol. Genet.* 1, e5. doi:10.1212/NXG.0000000000000005.
- Poryo, M., Clasen, O., Oehl-Jaschkowitz, B., Christmann, A., Gortner, L., and Meyer, S. (2017). Dravet syndrome: a new causative SCN1A mutation? *Clin. Case Reports* 5, 613–615. doi:10.1002/ccr3.787.
- Posey, J. E., Harel, T., Liu, P., Rosenfeld, J. A., James, R. A., Coban Akdemir, Z. H., et al. (2017). Resolution of Disease Phenotypes Resulting from Multilocus Genomic Variation. *N. Engl. J. Med.* 376, 21–31. doi:10.1056/NEJMoa1516767.
- Raymond, G., Wohler, E., Dinsmore, C., Cox, J., Johnston, M., Batista, D., et al. (2011). An interstitial duplication at 2q24.3 involving the SCN1A, SCN2A, SCN3A genes associated with infantile epilepsy. *Am. J. Med. Genet. Part A* 155, 920–923. doi:10.1002/ajmg.a.33929.
- Ream, M. A., and Mikati, M. A. (2014). Clinical utility of genetic testing in pediatric drug-resistant epilepsy: A pilot study. *Epilepsy Behav.* 37, 241–248. doi:10.1016/j.yebeh.2014.06.018.

- Retterer, K., Juusola, J., Cho, M. T., Vitazka, P., Millan, F., Gibellini, F., et al. (2016). Clinical application of whole-exome sequencing across clinical indications. *Genet. Med.* 18, 696–704. doi:10.1038/gim.2015.148.
- Reyes, I. S., Hsieh, D. T., Laux, L. C., and Wilfong, A. A. (2011). Alleged Cases of Vaccine Encephalopathy Rediagnosed Years Later as Dravet Syndrome. *Pediatrics* 128. doi:10.1542/peds.2010-0887.
- Rhodes, T. H., Lossin, C., Vanoye, C. G., Wang, D. W., and George, A. L. (2004). Noninactivating voltage-gated sodium channels in severe myoclonic epilepsy of infancy. *Proc. Natl. Acad. Sci. U. S. A.* 101, 11147–11152. doi:10.1073/pnas.0402482101.
- Rhodes, T. H., Vanoye, C. G., Ohmori, I., Ogiwara, I., Yamakawa, K., and George, A. L. (2005). Sodium channel dysfunction in intractable childhood epilepsy with generalized tonic-clonic seizures. *J. Physiol.* 569, 433–445. doi:10.1113/jphysiol.2005.094326.
- Rilstone, J. J., Coelho, F. M., Minassian, B. A., and Andrade, D. M. (2012). Dravet syndrome: Seizure control and gait in adults with different SCN1A mutations. *Epilepsia* 53, 1421–1428. doi:10.1111/j.1528-1167.2012.03583.x.
- Riva, D., Vago, C., Pantaleoni, C., Bulgheroni, S., Mantegazza, M., and Franceschetti, S. (2009). Progressive neurocognitive decline in two children with Dravet syndrome, de novo SCN1A truncations and different epileptic phenotypes. *Am. J. Med. Genet. Part A* 149A, 2339–2345. doi:10.1002/ajmg.a.33029.
- Rocca, F. E., De Marco, E. V., Annesi, F., Civitelli, D., Provenzano, G., Sproviero, W., et al. (2010). Novel human pathological mutations. *Hum. Genet.* 127, 463–490. doi:10.1007/s00439-010-0788-5.
- Rodda, J. M., Scheffer, I. E., McMahon, J. M., Berkovic, S. F., and Graham, H. K. (2012). Progressive Gait Deterioration in Adolescents With Dravet Syndrome. *Arch. Neurol.* 69, 873–878. doi:10.1001/archneurol.2011.3275.
- Saitoh, M., Ishii, A., Ihara, Y., Hoshino, A., Terashima, H., Kubota, M., et al. (2015a). Missense mutations in sodium channel SCN1A and SCN2A predispose children to encephalopathy with severe febrile seizures. *Epilepsy Res.* 117, 1–6. doi:10.1016/j.eplesyres.2015.08.001.
- Saitoh, M., Shinohara, M., Hoshino, H., Kubota, M., Amemiya, K., Takanashi, J., et al. (2012). Mutations of the SCN1A gene in acute encephalopathy. *Epilepsia* 53, 558–564. doi:10.1111/j.1528-1167.2011.03402.x.
- Saitoh, M., Shinohara, M., Ishii, A., Ihara, Y., Hirose, S., Shiomi, M., et al. (2015b). Clinical and genetic features of acute encephalopathy in children taking theophylline. *Brain Dev.* 37, 463–470. doi:10.1016/j.braindev.2014.07.010.
- Sanchez-Carpintero, R., Patiño-García, A., and Urrestarazu, E. (2013). Musicogenic seizures in Dravet syndrome. *Dev. Med. Child Neurol.* 55, 668–670. doi:10.1111/dmcn.12138.
- Selmer, K., Eriksson, A.-S., Brandal, K., Egeland, T., Tallaksen, C., and Undlien, D. (2009). Parental

- SCN1A mutation mosaicism in familial Dravet syndrome. *Clin. Genet.* 76, 398–403. doi:10.1111/j.1399-0004.2009.01208.x.
- Selmer, K. K., Egeland, T., Solaas, M. H., Nakken, K. O., Kjeldsen, M. J., Friis, M. L., et al. (2008). Genetic screening of Scandinavian families with febrile seizures and epilepsy or GEFS+. *Acta Neurol. Scand.* 117, 289–292. doi:10.1111/j.1600-0404.2007.00941.x.
- Sharkia, R., Hengel, H., Schöls, L., Athamna, M., Bauer, P., and Mahajnah, M. (2016). Parental mosaicism in another case of Dravet syndrome caused by a novel SCN1A deletion: A case report. *J. Med. Case Rep.* 10, 67. doi:10.1186/s13256-016-0854-2.
- Shi, X., Yasumoto, S., Nakagawa, E., Fukasawa, T., Uchiya, S., and Hirose, S. (2009). Missense mutation of the sodium channel gene SCN2A causes Dravet syndrome. *Brain Dev.* 31, 758–762. doi:10.1016/j.braindev.2009.08.009.
- Shi, Y. W., Yu, M. J., Long, Y. S., Qin, B., He, N., Meng, H., et al. (2012). Mosaic SCN1A mutations in familial partial epilepsy with antecedent febrile seizures. *Genes, Brain Behav.* 11, 170–176. doi:10.1111/j.1601-183X.2011.00756.x.
- Singh, N. A., Pappas, C., Dahle, E. J., Claes, L. R. F., Pruess, T. H., De Jonghe, P., et al. (2009). A Role of SCN9A in Human Epilepsies, As a Cause of Febrile Seizures and As a Potential Modifier of Dravet Syndrome. *PLoS Genet.* 5, e1000649. doi:10.1371/journal.pgen.1000649.
- Skjei, K. L., Church, E. W., Harding, B. N., Santi, M., Holland-Bouley, K. D., Clancy, R. R., et al. (2015). Clinical and histopathological outcomes in patients with SCN1A mutations undergoing surgery for epilepsy. *J. Neurosurg. Pediatr.* 16, 668–674. doi:10.3171/2015.5.PEDS14551.
- Sone, D., Sugawara, T., Sakakibara, E., Tomioka, Y., Taniguchi, G., Murata, Y., et al. (2012). A case of autosomal dominant nocturnal frontal lobe epilepsy (ADNFLE) coexisting with pervasive developmental disorder harboring SCN1A mutation in addition to CHRN2 mutation. *Epilepsy Behav.* 25, 192–195. doi:10.1016/j.yebeh.2012.07.027.
- Spampanato, J. (2004). A Novel Epilepsy Mutation in the Sodium Channel SCN1A Identifies a Cytoplasmic Domain for Subunit Interaction. *J. Neurosci.* 24, 10022–10034. doi:10.1523/JNEUROSCI.2034-04.2004.
- Spampanato, J., Escayg, A., Meisler, M. H., and Goldin, A. L. (2001a). Functional effects of two voltage-gated sodium channel mutations that cause generalized epilepsy with febrile seizures plus type 2. *J. Neurosci.* 21, 7481–7490. doi:10.1523/jneurosci.21-19-07481.2001.
- Spampanato, J., Escayg, A., Meisler, M. H., and Goldin, A. L. (2003). Generalized epilepsy with febrile seizures plus type 2 mutation W1204R alters voltage-dependent gating of Nav1.1 sodium channels. *Neuroscience* 116, 37–48. doi:10.1016/S0306-4522(02)00698-X.
- Specchio, N., Trivisano, M., Balestri, M., Gennaro, E., Specchio, L. M., Fusco, L., et al. (2010). A novel de novo SCN1A missense mutation in Severe Myoclonic Epilepsy Borderland. *Acta Neurol. Belg.* 110, 281–3. Available at: <http://www.ncbi.nlm.nih.gov/pubmed/21114141>.
- Staněk, D., Laššuthová, P., Štěrbová, K., Vlčková, M., Neupauerová, J., Krůtová, M., et al. (2018). Detection rate of causal variants in severe childhood epilepsy is highest in patients with seizure

- onset within the first four weeks of life. *Orphanet J. Rare Dis.* 13, 71. doi:10.1186/s13023-018-0812-8.
- Stefanaki, E., Aggelakou, V., Orfanou, M., Kokori, E., and Boutoufianakis, S. (2006). Epilepsy with a de novo missense mutation in the sodium channel  $\alpha 1$  subunit: A case report. *Acta Paediatr.* 95, 1703–1706. doi:10.1080/08035250600778628.
- Stosser, M. B., Lindy, A. S., Butler, E., Retterer, K., Piccirillo-Stosser, C. M., Richard, G., et al. (2018). High frequency of mosaic pathogenic variants in genes causing epilepsy-related neurodevelopmental disorders. *Genet. Med.* 20, 403–410. doi:10.1038/gim.2017.114.
- Sugawara, T., Mazaki-Miyazaki, E., Fukushima, K., Shimomura, J., Fujiwara, T., Hamano, S., et al. (2002). Frequent mutations of SCN1A in severe myoclonic epilepsy in infancy. *Neurology* 58, 1122–1124. doi:10.1212/WNL.58.7.1122.
- Sugawara, T., Mazaki-Miyazaki, E., Ito, M., Nagafuji, H., Fukuma, G., Mitsudome, A., et al. (2001). Nav1.1 mutations cause febrile seizures associated with afebrile partial seizures. *Neurology* 57, 703–705. doi:10.1212/WNL.57.4.703.
- Sugawara, T., Tsurubuchi, Y., Fujiwara, T., Mazaki-Miyazaki, E., Nagata, K., Montal, M., et al. (2003). Nav1.1 channels with mutations of severe myoclonic epilepsy in infancy display attenuated currents. *Epilepsy Res.* 54, 201–207. doi:10.1016/S0920-1211(03)00084-6.
- Sugiura, Y., Ogiwara, I., Hoshi, A., Yamakawa, K., and Ugawa, Y. (2012). Different degrees of loss of function between GEFS+ and SMEI Na v1.1 missense mutants at the same residue induced by rescuable folding defects. *Epilepsia* 53, 111–114. doi:10.1111/j.1528-1167.2012.03467.x.
- Suls, A., Claeys, K. G., Goossens, D., Harding, B., Luijk, R. Van, Scheers, S., et al. (2006). Microdeletions involving the SCN1A gene may be common in SCN1A-mutation-negative SMEI patients. *Hum. Mutat.* 27, 914–920. doi:10.1002/humu.20350.
- Sun, H., Zhang, Y., Liang, J., Liu, X., Ma, X., Qin, J., et al. (2008a). Seven novel SCN1A mutations in Chinese patients with severe myoclonic epilepsy of infancy. *Epilepsia* 49, 1104–1107. doi:10.1111/j.1528-1167.2008.01549\_2.x.
- Sun, H., Zhang, Y., Liang, J., Liu, X., Ma, X., Wu, H., et al. (2008b). SCN1A, SCN1B, and GABRG2 gene mutation analysis in Chinese families with generalized epilepsy with febrile seizures plus. *J. Hum. Genet.* 53, 769–774. doi:10.1007/s10038-008-0306-y.
- Sun, H., Zhang, Y., Liu, X., Ma, X., Yang, Z., Qin, J., et al. (2010). Analysis of SCN1A mutation and parental origin in patients with Dravet syndrome. *J. Hum. Genet.* 55, 421–427. doi:10.1038/jhg.2010.39.
- Sun, L., Gilligan, J., Staber, C., Schutte, R. J., Nguyen, V., O'Dowd, D. K., et al. (2012). A Knock-In Model of Human Epilepsy in Drosophila Reveals a Novel Cellular Mechanism Associated with Heat-Induced Seizure. *J. Neurosci.* 32, 14145–14155. doi:10.1523/JNEUROSCI.2932-12.2012.
- Surovy, M., Soltysova, A., Kolnikova, M., Sykora, P., Ilencikova, D., Ficek, A., et al. (2016). Novel SCN1A variants in Dravet syndrome and evaluating a wide approach of patient selection. *Gen.*



*Physiol. Biophys.* 35, 333–342. doi:10.4149/gpb\_2016002.

- Takayanagi, M., Haginoya, K., Umehara, N., Kitamura, T., Numata, Y., Wakusawa, K., et al. (2010). Acute encephalopathy with a truncation mutation in the SCN1A gene: A case report. *Epilepsia* 51, 1886–1888. doi:10.1111/j.1528-1167.2010.02600.x.
- Tan, E. H., Razak, S. A., Abdullah, J. M., and Mohamed Yusoff, A. A. (2012). De-novo mutations and genetic variation in the SCN1A gene in Malaysian patients with generalized epilepsy with febrile seizures plus (GEFS+). *Epilepsy Res.* 102, 210–215. doi:10.1016/j.eplepsyres.2012.08.004.
- Tang, S., Lin, J. P., Hughes, E., Siddiqui, A., Lim, M., and Lascelles, K. (2011). Encephalopathy and SCN1A mutations. *Epilepsia* 52, e26–e30. doi:10.1111/j.1528-1167.2011.03019.x.
- Tiefes, A. M., Hartlieb, T., Tacke, M., von Stülpnagel-Steinbeis, C., Larsen, L. H. G., Hao, Q., et al. (2019). Mesial Temporal Sclerosis in SCN1A -Related Epilepsy: Two Long-Term EEG Case Studies. *Clin. EEG Neurosci.* 50, 267–272. doi:10.1177/1550059418794347.
- Tonekaboni, S. H., Ebrahimi, A., Bakhshandeh Bali, M. K., Taheri Otaghsara, S. M., Houshmand, M., Nasehi, M. M., et al. (2013). Sodium channel gene mutations in Children with GEFS+ and Dravet syndrome: A cross sectional study. *Iran. J. Child Neurol.* 7, 31–36. doi:10.22037/ijcn.v7i2.4074.
- Trujillano, D., Bertoli-Avella, A. M., Kumar Kandaswamy, K., Weiss, M. E., Köster, J., Marais, A., et al. (2017). Clinical exome sequencing: results from 2819 samples reflecting 1000 families. *Eur. J. Hum. Genet.* 25, 176–182. doi:10.1038/ejhg.2016.146.
- Trump, N., McTague, A., Brittain, H., Papandreou, A., Meyer, E., Ngoh, A., et al. (2016). Improving diagnosis and broadening the phenotypes in early-onset seizure and severe developmental delay disorders through gene panel analysis. *J. Med. Genet.* 53, 310–317. doi:10.1136/jmedgenet-2015-103263.
- Tsai, M.-H., Chan, C.-K., Chang, Y.-C., Lin, C.-H., Liou, C.-W., Chang, W.-N., et al. (2018). Molecular Genetic Characterization of Patients With Focal Epilepsy Using a Customized Targeted Resequencing Gene Panel. *Front. Neurol.* 9. doi:10.3389/fneur.2018.00515.
- Tsuji, M., Mazaki, E., Ogiwara, I., Wada, T., Iai, M., Okumura, A., et al. (2011). Acute Encephalopathy in a Patient with Dravet Syndrome. *Neuropediatrics* 42, 78–81. doi:10.1055/s-0031-1279725.
- Tuncer, F. N., Gormez, Z., Calik, M., Altiocka Uzun, G., Sagiroglu, M. S., Yuceturk, B., et al. (2015). A clinical variant in SCN1A inherited from a mosaic father cosegregates with a novel variant to cause Dravet syndrome in a consanguineous family. *Epilepsy Res.* 113, 5–10. doi:10.1016/j.eplepsyres.2015.02.020.
- Usluer, S., Salar, S., Arslan, M., Yiş, U., Kara, B., Tektürk, P., et al. (2016). SCN1A gene sequencing in 46 Turkish epilepsy patients disclosed 12 novel mutations. *Seizure* 39, 34–43. doi:10.1016/j.seizure.2016.05.008.
- Vadlamudi, L., Dibbens, L. M., Lawrence, K. M., Iona, X., McMahon, J. M., Murrell, W., et al.

- (2010). Timing of De Novo Mutagenesis — A Twin Study of Sodium-Channel Mutations. *N. Engl. J. Med.* 363, 1335–1340. doi:10.1056/NEJMoa0910752.
- Vanmolkot, K. R. J., Babini, E., de Vries, B., Stam, A. H., Freilinger, T., Terwindt, G. M., et al. (2007). The novel p.L1649Q mutation in the SCN1A epilepsy gene is associated with familial hemiplegic migraine: genetic and functional studies. *Hum. Mutat.* 28, 522–522. doi:10.1002/humu.9486.
- Veeramah, K. R., Johnstone, L., Karafet, T. M., Wolf, D., Sprissler, R., Salogiannis, J., et al. (2013). Exome sequencing reveals new causal mutations in children with epileptic encephalopathies. *Epilepsia* 54, 1270–1281. doi:10.1111/epi.12201.
- Verbeek, N. E., van der Maas, N. A. T., Jansen, F. E., van Kempen, M. J. A., Lindhout, D., and Brilstra, E. H. (2013). Prevalence of SCN1A-Related Dravet Syndrome among Children Reported with Seizures following Vaccination: A Population-Based Ten-Year Cohort Study. *PLoS One* 8, e65758. doi:10.1371/journal.pone.0065758.
- Verbeek, N. E., van Kempen, M., Gunning, W. B., Renier, W. O., Westland, B., Lindhout, D., et al. (2011). Adults with a history of possible Dravet syndrome: An illustration of the importance of analysis of the SCN1A gene. *Epilepsia* 52, e23–e25. doi:10.1111/j.1528-1167.2011.02982.x.
- Villeneuve, N., Laguitton, V., Viellard, M., Lépine, A., Chabrol, B., Dravet, C., et al. (2014). Cognitive and adaptive evaluation of 21 consecutive patients with Dravet syndrome. *Epilepsy Behav.* 31, 143–148. doi:10.1016/j.yebeh.2013.11.021.
- Volkers, L., Kahlig, K. M., Verbeek, N. E., Das, J. H. G., van Kempen, M. J. A., Stroink, H., et al. (2011). Na v1.1 dysfunction in genetic epilepsy with febrile seizures-plus or Dravet syndrome. *Eur. J. Neurosci.* 34, 1268–1275. doi:10.1111/j.1460-9568.2011.07826.x.
- Wallace, R. H., Hodgson, B. L., Grinton, B. E., Gardiner, R. M., Robinson, R., Rodriguez-Casero, V., et al. (2003). Sodium channel 1-subunit mutations in severe myoclonic epilepsy of infancy and infantile spasms. *Neurology* 61, 765–769. doi:10.1212/01.WNL.0000086379.71183.78.
- Wallace, R. H., Scheffer, I. E., Barnett, S., Richards, M., Dibbens, L., Desai, R. R., et al. (2001). Neuronal sodium-channel  $\beta$ 1-subunit mutations in generalized epilepsy with febrile seizures plus. *Am. J. Hum. Genet.* 68, 859–865. doi:10.1086/319516.
- Wang, J., Kurahashi, H., Ishii, A., Kojima, T., Ohfu, M., Inoue, T., et al. (2008). Microchromosomal deletions involving SCN1A and adjacent genes in severe myoclonic epilepsy in infancy. *Epilepsia* 49, 1528–1534. doi:10.1111/j.1528-1167.2008.01609.x.
- Wang, J. W., Shi, X. Y., Kurahashi, H., Hwang, S. K., Ishii, A., Higurashi, N., et al. (2012). Prevalence of SCN1A mutations in children with suspected Dravet syndrome and intractable childhood epilepsy. *Epilepsy Res.* 102, 195–200. doi:10.1016/j.epilepsyres.2012.06.006.
- Wang, Y., Du, X., Bin, R., Yu, S., Xia, Z., Zheng, G., et al. (2017). Genetic Variants Identified from Epilepsy of Unknown Etiology in Chinese Children by Targeted Exome Sequencing. *Sci. Rep.* 7, 40319. doi:10.1038/srep40319.

- Wei, C.-M., Xia, G.-Z., and Ren, R.-N. (2018). [Gene mutations in unexplained infantile epileptic encephalopathy: an analysis of 47 cases]. *Zhongguo Dang Dai Er Ke Za Zhi* 20, 125–129. doi:10.7499/j.issn.1008-8830.2018.02.009.
- Weiss, L. A., Escayg, A., Kearney, J. A., Trudeau, M., MacDonald, B. T., Mori, M., et al. (2003). Sodium channels SCN1A, SCN2A and SCN3A in familial autism. *Mol. Psychiatry* 8, 186–194. doi:10.1038/sj.mp.4001241.
- Weller, C. M., Pelzer, N., de Vries, B., López, M. A., De Fàbregues, O., Pascual, J., et al. (2014). Two novel SCN1A mutations identified in families with familial hemiplegic migraine. *Cephalalgia* 34, 1062–1069. doi:10.1177/0333102414529195.
- Willemsen, M. H., Rensen, J. H. M., van Schrojenstein-Lantman de Valk, H. M. J., Hamel, B. C. J., and Kleefstra, T. (2012). Adult Phenotypes in Angelman- and Rett-Like Syndromes. *Mol. Syndromol.* 2, 217–234. doi:10.1159/000335661.
- Wu, Y. W., Sullivan, J., McDaniel, S. S., Meisler, M. H., Walsh, E. M., Li, S. X., et al. (2015). Incidence of dravet syndrome in a US population. *Pediatrics* 136, e1310–e1315. doi:10.1542/peds.2015-1807.
- Xiong, H. Y., Alipanahi, B., Lee, L. J., Bretschneider, H., Merico, D., Yuen, R. K. C., et al. (2015). The human splicing code reveals new insights into the genetic determinants of disease. *Science* (80-. ). 347, 1254806–1254806. doi:10.1126/science.1254806.
- Xu, X., Yang, X., Wu, Q., Liu, A., Yang, X., Ye, A. Y., et al. (2015). Amplicon Resequencing Identified Parental Mosaicism for Approximately 10% of “de novo” SCN1A Mutations in Children with Dravet Syndrome. *Hum. Mutat.* 36, 861–872. doi:10.1002/humu.22819.
- Xu, X., Zhang, Y., Sun, H., Liu, X., Yang, X., Xiong, H., et al. (2014). Early clinical features and diagnosis of Dravet syndrome in 138 Chinese patients with SCN1A mutations. *Brain Dev.* 36, 676–681. doi:10.1016/j.braindev.2013.10.004.
- Yang, X., Liu, A., Xu, X., Yang, X., Zeng, Q., Ye, A. Y., et al. (2017). Genomic mosaicism in paternal sperm and multiple parental tissues in a Dravet syndrome cohort. *Sci. Rep.* 7, 15677. doi:10.1038/s41598-017-15814-7.
- Yordanova, I., Todorov, T., Dimova, P., Hristova, D., Tincheva, R., Litvinenko, I., et al. (2011). One novel Dravet syndrome causing mutation and one recurrent MAE causing mutation in SCN1A gene. *Neurosci. Lett.* 494, 180–183. doi:10.1016/j.neulet.2011.03.008.
- Yu, M.-J., Shi, Y.-W., Gao, M.-M., Deng, W.-Y., Liu, X.-R., Chen, L., et al. (2010). Milder phenotype with SCN1A truncation mutation other than SMEI. *Seizure* 19, 443–445. doi:10.1016/j.seizure.2010.06.010.
- Zhang, Y., Chen, N., Zhou, M., Guo, J., Guo, J., and He, L. (2017). A novel SCN1A mutation identified in a Chinese family with familial hemiplegic migraine: A case report. *Cephalalgia* 37, 1294–1298. doi:10.1177/0333102416677049.
- Zhang, Y., Kong, W., Gao, Y., Liu, X., Gao, K., Xie, H., et al. (2015). Gene Mutation Analysis in 253 Chinese Children with Unexplained Epilepsy and Intellectual/Developmental Disabilities.

*PLoS One* 10, e0141782. doi:10.1371/journal.pone.0141782.

- Zhou, P., He, N., Zhang, J. W., Lin, Z. J., Wang, J., Yan, L. M., et al. (2018). Novel mutations and phenotypes of epilepsy-associated genes in epileptic encephalopathies. *Genes, Brain Behav.* 17, e12456. doi:10.1111/gbb.12456.
- Zhu, X., Padmanabhan, R., Copeland, B., Bridgers, J., Ren, Z., Kamalakaran, S., et al. (2017). A case-control collapsing analysis identifies epilepsy genes implicated in trio sequencing studies focused on de novo mutations. *PLoS Genet.* 13, e1007104. doi:10.1371/journal.pgen.1007104.
- Zuberi, S. M., Brunklaus, A., Birch, R., Reavey, E., Duncan, J., and Forbes, G. H. (2011). Genotype-phenotype associations in SCN1A-related epilepsies. *Neurology* 76, 594–600. doi:10.1212/WNL.0b013e31820c309b.
- Zucca, C., Redaelli, F., Epifanio, R., Zanotta, N., Romeo, A., Lodi, M., et al. (2008). Cryptogenic Epileptic Syndromes Related to SCN1A. *Arch. Neurol.* 65, 489. doi:10.1001/archneur.65.4.489.
